# Supplementary material for: Catalytic asymmetric [3+2] cycloaddition of isomünchnones with methyleneindolinones
Source: Royal Society of Chemistry journal article supplement (doi:10.1039/d1cc03685h), 2021-01-01

# Catalytic asymmetric [3+2] cycloaddition of isomünchnones with methyleneindolinones

Kaixuan Wang, Chaoran Xu, Xinyue Hu, Yuqiao Zhou,\* Lin Lili and Xiaoming Feng\*

Key Laboratory of Green Chemistry and Technology Ministry of Education, College of Chemistry, Sichuan University,  
Chengdu 610064 (China)

E-mail: xmfeng@scu.edu.cn

## Electronic Supporting Information

### CONTENT

|                                                                                                  |    |
|--------------------------------------------------------------------------------------------------|----|
| Catalytic asymmetric [3+2] cycloaddition of isomünchnones with methyleneindolinones .....        | 1  |
| 1. General Information .....                                                                     | 2  |
| 2. General Procedure for the Preparation of Substrates.....                                      | 2  |
| 2.1 General Procedure for the Preparation of Methyleneindolinones .....                          | 2  |
| 2.2 General Procedure for the Preparation of Diazoimides.....                                    | 3  |
| 3. Characters of diazo compounds <b>2f</b> , <b>2g</b> , <b>2i</b> , <b>2k</b> , <b>2m</b> ..... | 4  |
| 4. General Procedure for the Preparation of Racemic Products .....                               | 5  |
| 5. General Procedure for the Catalytic Asymmetric Reaction.....                                  | 5  |
| 6. The Optimization of Reaction Conditions.....                                                  | 6  |
| 7. The List of the Substrate Scope.....                                                          | 10 |
| 8. Experimental Procedures for Gram-Scale Synthesis and Derivatizations of <b>3ca</b> .....      | 11 |
| 8.1 Experimental Procedure for Gram-Scale Synthesis of <b>3ca</b> .....                          | 11 |
| 8.2 Experimental Procedures for Derivatizations of <b>3ca</b> .....                              | 12 |
| 9. Operando IR experiments.....                                                                  | 13 |
| 10. Crystal Data of Products.....                                                                | 15 |
| 10.1 Crystal Data of Product <b>3aa</b> .....                                                    | 15 |
| 10.2 Crystal Data of Product <b>4ca</b> .....                                                    | 16 |
| 11. Characterization of Products .....                                                           | 19 |
| 12. Reference.....                                                                               | 46 |
| 13. Copies of NMR-Spectra of Products.....                                                       | 47 |
| 14. Copies of CD Spectra for the Products.....                                                   | 86 |

## 1. General Information

**NMR characterization data** were collected on Bruker ASCEND™ 400M and 600M. <sup>1</sup>H NMR and <sup>13</sup>C{<sup>1</sup>H} NMR: chemical shifts  $\delta$  were recorded in ppm relative to tetramethylsilane and internally referenced to the residual solvent signal (for <sup>1</sup>H NMR: CDCl<sub>3</sub> = 7.26 ppm; for <sup>13</sup>C NMR: CDCl<sub>3</sub> = 77.16 ppm). Data were reported as follows: chemical shift, multiplicity (s = singlet, d = doublet, t = triplet, q = quartet, dd = doublet of doublets, td = triplet of doublets, dt = doublet of triplets, ddd = doublet of doublet of doublets, m = multiplet), coupling constants (Hz), integration.

**Enantiomeric excesses (ee)** were determined by HPLC (High performance liquid chromatography) analysis using the corresponding commercial chiralpak column (IG, IF, IA, etc.) as stated in the experimental procedures at 25 °C.

**Optical rotations** measured on Rudolph Research Analytic Automatic Polarimeter were reported as follows:  $[\alpha]_D^{25}$  (c: g/100 mL, in CH<sub>2</sub>Cl<sub>2</sub>).

**HRMS** (High resolution mass spectra) were performed on Thermo Q-Exactive Focus (FTMS+c ESI) and data were reported as (m/z).

**Infrared spectra (IR)** were recorded on Shimadzu IRTracer-100 or Bruker Tensor II spectrometer with Plantium ATR accessory. The peaks are reported as absorption maxima ( $\tilde{\nu}$ , cm<sup>-1</sup>).

**Circular dichroism spectrum (CD)** were recorded on Applied Photophysics Chirascan.

**X-Ray crystallographic data** were collected by a Bruker D8 Venture Photon II.

The *N,N'*-dioxides were prepared according to the methods reported in the literature.<sup>1</sup>

## 2. General Procedure for the Preparation of Substrates

### 2.1 General Procedure for the Preparation of Methyleneindolinones<sup>2</sup>

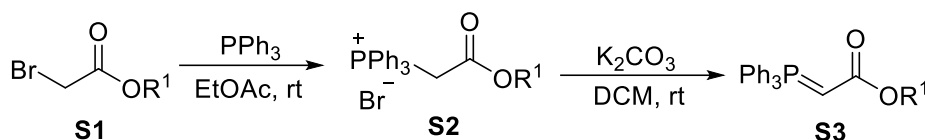

To a solution of triphenylphosphine (20 mmol) in ethyl acetate (20.0 mL) was added **S1** (20 mmol) at room temperature, and the mixture was stirred overnight. The resulting mixture was filtered (solvent: ethyl acetate), and the crude product **S2** (white solid) was directly subjected to the next reaction without further purification. To a solution of **S2** in DCM (10.0 mL) was added K<sub>2</sub>CO<sub>3</sub> (20 mmol) at room temperature. The reaction mixture was stirred for at least 30 minutes and then washed with H<sub>2</sub>O. The aqueous layer was extracted with DCM in three times. The combined organic mixtures were washed with brine (20.0 mL), dried over anhydrous Na<sub>2</sub>SO<sub>4</sub>, filtered (solvent: DCM), and concentrated under reduced pressure. The obtained product **S3** was used directly for the next step.

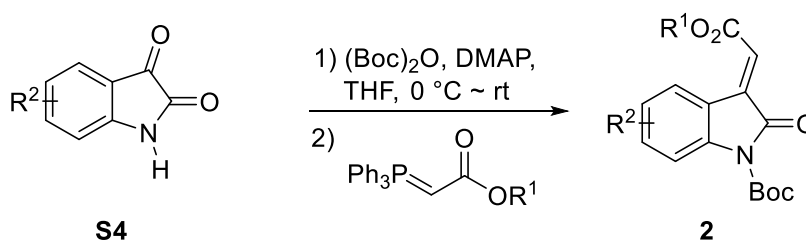

(Boc)<sub>2</sub>O (Di-*tert*-butyl dicarbonate, 24 mmol) was added to a solution of Isatin **S4** (20 mmol) and DMAP (*N,N*-

dimethylpyridin-4-amine, 2 mmol) in THF (20.0 mL) at 0 °C. After stirring for 2 h at room temperature, a solution of **S3** from general procedure 2.1 was added to the reaction mixture. Keep stirring until the reaction solution was fully transparent. Then the solvent was removed under reduced pressure. 20.0 mL water and 20.0 mL ethyl acetate were added to the mixture. The aqueous layer was washed with ethyl acetate (3x 20.0 mL). The combined organic phases was washed with brine (20.0 mL) and dried over anhydrous Na<sub>2</sub>SO<sub>4</sub>. After being filtered and concentrated under reduced pressure, the residue was subjected to column chromatography on silica gel with petroleum ether/ethyl acetate = 15/1 (v/v). The product **2** was obtained as a yellow solid.

## 2.2 General Procedure for the Preparation of Diazoimides<sup>3</sup>

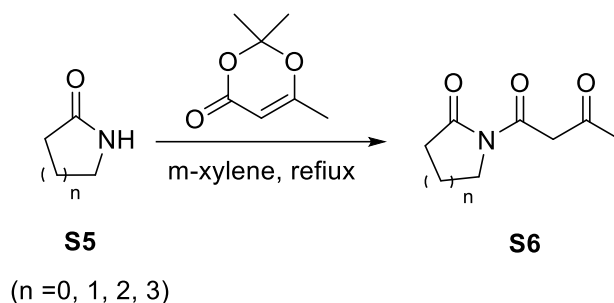

A solution containing **S5** (50 mmol) and 2,2,6-trimethyl-1,3-dioxin-4-one (55 mmol) in 30 mL of *m*-xylene was heated at reflux for 1 ~ 2 h. The solvent was removed under reduced pressure, and the residue was subjected to column chromatography on silica gel with petroleum ether/ethyl acetate = 4/1 (v/v). The product **S6** was obtained in 60 ~ 70% yield as a yellow oil.

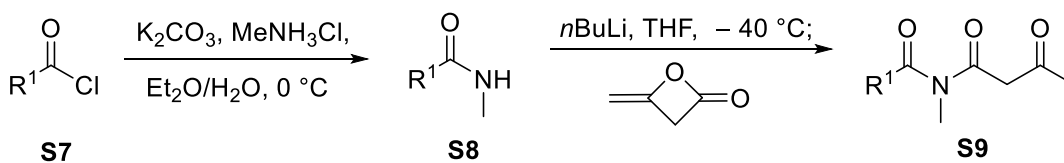

K<sub>2</sub>CO<sub>3</sub> (15 mmol) was added to a solution of **S7** (10 mmol) and MeNH<sub>3</sub>Cl (15 mmol) in mixed solvent of 10.0 mL Et<sub>2</sub>O and 10.0 mL H<sub>2</sub>O. After the reaction was completed, the reaction mixture was extracted with ethyl acetate in three times. The combined organic mixtures were dried over anhydrous Na<sub>2</sub>SO<sub>4</sub>, filtered (solvent: ethyl acetate), and concentrated under reduced pressure to afford crude product **S9**. After the following recrystallization (ethyl acetate / petroleum ether = 10/1, v/v), the product **S9** was dissolved in 20.0 mL to an over dried 100 mL round-bottom flask under N<sub>2</sub> atmosphere. At -40 °C, 5 mL 2.5 mol/L <sup>n</sup>BuLi was added dropwise to the solution of **S9**. Keep stirring until the reaction mixture became red and then 4-methyleneoxetan-2-one was added dropwise. When the reaction was completed, the solvent was removed under reduced pressure. 20.0 mL water was added and the aqueous layer was extracted with ethyl acetate (3x 20.0 mL). The combined organic phases was washed with brine (20.0 mL), and dried over anhydrous Na<sub>2</sub>SO<sub>4</sub>. After being filtered and concentrated under reduced pressure, the residue was subjected to column chromatography on silica gel with petroleum ether/ethyl acetate = 6/1 (v/v). The product **S9** was obtained in 30 ~ 50% yield as a yellow oil.

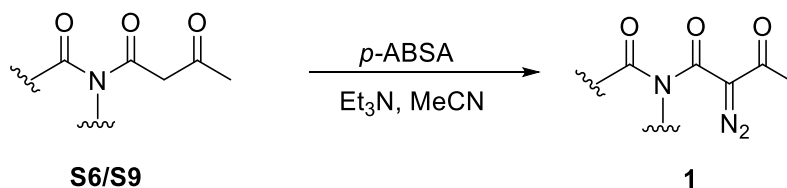

To a solution of **S6/S9** (5 mmol) and *p*-ABSA (*p*-Acetamidobenzenesulfonyl azide, 5 mmol) in 10 mL MeCN was added Et<sub>3</sub>N

(5.5 mmol) at room temperature, and the mixture was stirred overnight. After the reaction was completed, the solvent was removed under reduced pressure, and the residue was subjected to column chromatography on silica gel with petroleum ether/ethyl acetate =2/1 (v/v). The product **1** was obtained in 85 ~ 97% yield as a light yellow oil or solid.

### 3. Characters of diazo compounds **2f**, **2g**, **2i**, **2k**, **2m**

#### 2-Chloro-*N*-(2-diazo-3-oxobutanoyl)-*N*-methylbenzamide (**2f**)

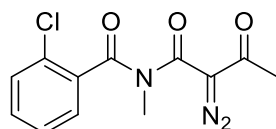

Yellow oil.  $^1\text{H NMR}$  (400 MHz,  $\text{CDCl}_3$ )  $\delta$  7.46 – 7.35 (m, 4H), 3.20 (s, 3H), 2.44 (s, 3H).  $^{13}\text{C NMR}$  (101 MHz,  $\text{CDCl}_3$ )  $\delta$  169.58, 164.41, 134.97, 131.86, 130.07, 128.77, 127.60, 77.48, 77.16, 76.84, 34.06, 28.56. **ESI-HRMS** scaled for  $[\text{C}_{12}\text{H}_{11}\text{Cl}^{34,9689}\text{N}_3\text{O}_3+\text{H}^+]$ : 280.0483, found 280.0486.  $[\text{C}_{12}\text{H}_{11}\text{Cl}^{36,9659}\text{N}_3\text{O}_3+\text{H}^+]$ : 282.0454, found 280.0457. **IR** (film):  $\tilde{\nu}$  ( $\text{cm}^{-1}$ ) 2957.89, 2927.51, 2136.44, 1661.94, 1592.26, 1475.57, 1436.03, 1301.01, 1187.45, 1073.16, 1024.46, 966.11, 930.91, 774.67, 635.07.

#### 3-Chloro-*N*-(2-diazo-3-oxobutanoyl)-*N*-methylbenzamide (**2g**)

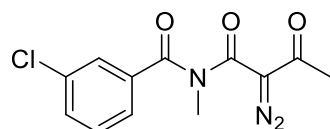

Yellow oil.  $^1\text{H NMR}$  (600 MHz,  $\text{CDCl}_3$ )  $\delta$  7.47 (s, 1H), 7.38 – 7.34 (m, 2H), 7.24 (t,  $J = 7.9$  Hz, 1H), 3.16 (s, 3H), 2.10 (s, 3H).  $^{13}\text{C NMR}$  (151 MHz,  $\text{CDCl}_3$ )  $\delta$  170.79, 164.80, 136.08, 134.20, 131.96, 129.60, 128.23, 126.31, 80.43, 43.45, 33.85, 27.11. **ESI-HRMS** scaled for  $[\text{C}_{12}\text{H}_{11}\text{Cl}^{34,9689}\text{N}_3\text{O}_3+\text{H}^+]$ : 280.0483, found 280.0485.  $[\text{C}_{12}\text{H}_{11}\text{Cl}^{36,9659}\text{N}_3\text{O}_3+\text{H}^+]$ : 282.0454, found 280.0453. **IR** (film):  $\tilde{\nu}$  ( $\text{cm}^{-1}$ ) 2976.7, 2122.94, 1700.04, 1662.43, 1423.25, 1343.44, 1296.19, 1045.68, 938.87, 803.85.

#### *N*-(2-Diazo-3-oxobutanoyl)-*N*,4-dimethylbenzamide (**2i**)

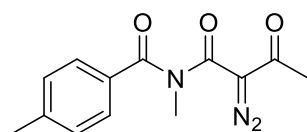

Yellow oil.  $^1\text{H NMR}$  (600 MHz,  $\text{CDCl}_3$ )  $\delta$  7.44 (d,  $J = 8.2$  Hz, 2H), 7.14 (d,  $J = 8.0$  Hz, 2H), 3.24 (s, 3H), 2.30 (s, 3H), 2.15 (s, 3H).  $^{13}\text{C NMR}$  (151 MHz,  $\text{CDCl}_3$ )  $\delta$  172.30, 165.18, 143.15, 131.51, 129.04, 128.55, 77.37, 77.16, 76.95, 34.02, 27.39, 21.41. **ESI-HRMS** scaled for  $[\text{C}_{13}\text{H}_{13}\text{N}_3\text{O}_3+\text{H}^+]$ : 260.1030, found 260.1031. **IR** (film):  $\tilde{\nu}$  ( $\text{cm}^{-1}$ ) 2956.44, 2925.34, 2122.22, 1662.43, 1609.62, 1363.46, 1297.63, 1177.8, 1039.17, 1016.02, 966.35, 932.6, 834.71, 789.62, 738.27, 627.84.

#### *N*-(2-Diazo-3-oxobutanoyl)-*N*-methyl-2-naphthamide (**2k**)

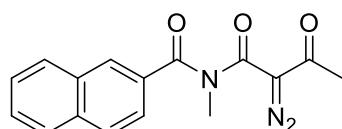

Dark yellow oil.  $^1\text{H NMR}$  (600 MHz,  $\text{CDCl}_3$ )  $\delta$  8.17 – 8.13 (m, 1H), 7.86 (m, 3H), 7.65 (dd,  $J = 8.5, 1.8$  Hz, 1H), 7.55 (m, 2H), 3.38 (s, 3H), 2.17 (s, 3H).  $^{13}\text{C NMR}$  (151 MHz,  $\text{CDCl}_3$ )  $\delta$  172.67, 165.39, 134.96, 132.25, 131.72, 129.76, 129.01, 128.51,



127.89, 127.22, 124.54, 77.37, 77.16, 76.95, 34.35, 27.50. **ESI-HRMS** scaled for  $[C_{16}H_{13}N_3O_3+H^+]$ : 296.1030, found 296.1033. **IR** (film):  $\tilde{\nu}$  ( $cm^{-1}$ ) 2956.68, 2925.58, 2121.49, 1659.53, 1609.38, 1419.39, 1295.22, 1177.8, 1114.87, 1087.63, 1038.69, 1016.02, 966.35, 932.60, 834.71, 789.86, 738.27, 627.84.

#### 2-Diazo-N-formyl-N-methyl-3-oxobutanamide (2m)

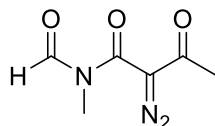

Yellow oil. **<sup>1</sup>H NMR** (400 MHz,  $CDCl_3$ )  $\delta$  8.69 (s, 1H), 3.14 (s, 3H), 2.38 (s, 3H). **<sup>13</sup>C NMR** (101 MHz,  $CDCl_3$ )  $\delta$  186.70, 163.39, 162.80, 28.70, 27.57. **ESI-HRMS** scaled for  $[C_6H_7N_3O_3+H^+]$ : 170.0560, found 170.0562. **IR** (film):  $\tilde{\nu}$  ( $cm^{-1}$ ) 2955.72, 2931.85, 2133.79, 1715.71, 1659.29, 1417.7, 965.87, 901.01, 790.10, 742.12

#### 4. General Procedure for the Preparation of Racemic Products

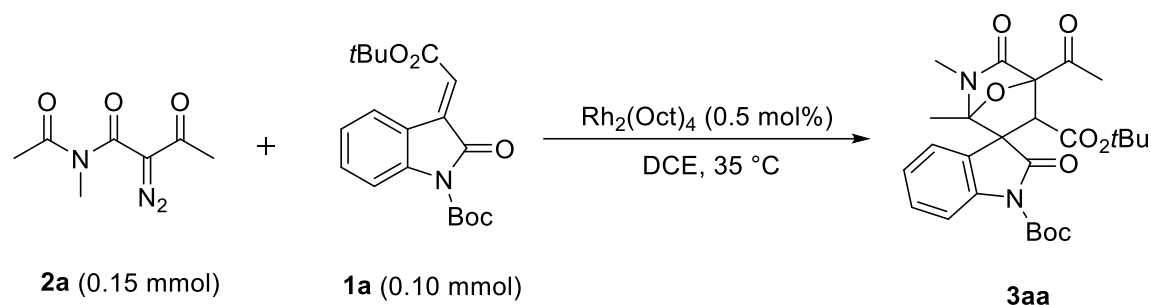

An oven-dried test tube was charged with **1a** (0.15 mmol), **2a** (0.15 mmol),  $Rh_2(Oct)_4$  (0.5 mol %) and DCE (1.0 mL) under  $N_2$  atmosphere. The resulted solution was stirred at 35 °C for 4 h. The reaction mixture was subjected to flash column chromatography on silica gel and eluted with petroleum ether/ethyl acetate = 4/1 (v/v) to afford the corresponding racemic product **3aa** (white solid, 41.1 mg, 82% yield). And other racemic products **3** were prepared according to the procedure described for **3aa**.

#### 5. General Procedure for the Catalytic Asymmetric Reaction

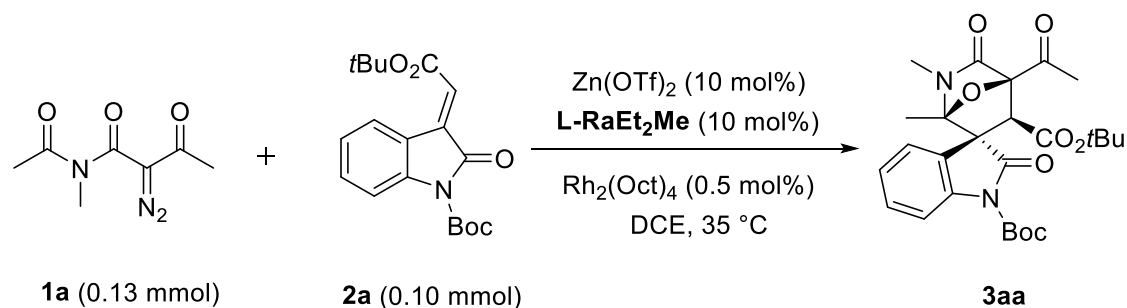

An oven-dried test tube was charged with catalyst **L-RaEt<sub>2</sub>Me**/ $Zn(OTf)_2$  (1:1, 10 mol %), **1a** (0.13 mmol) and **2a** (0.10 mmol) in 0.5 mL DCE under  $N_2$  atmosphere. At 35 °C, a solution of  $Rh_2(Oct)_4$  (0.5 mol %) in 0.5 mL DCE was added and the reaction was stirred at 35 °C for 4 h. The reaction mixture was subjected to flash column chromatography on silica gel and eluted with petroleum ether/ethyl acetate = 4/1 (v/v) to afford the corresponding product **3aa** (white solid, 44.7 mg, 89% yield, 98% ee, 98:2 dr).

## 6. The Optimization of Reaction Conditions

**Table S1** Optimization of Metal Salt

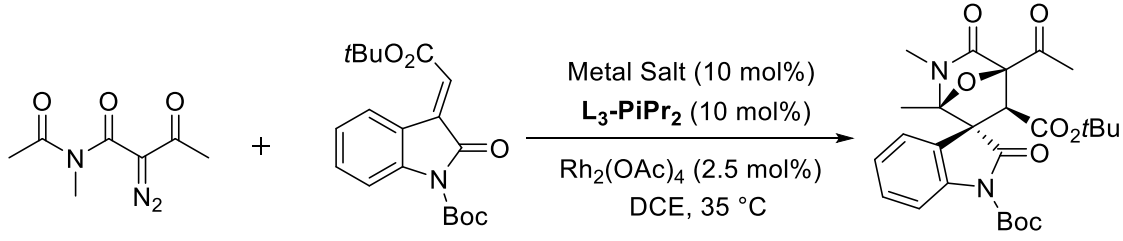

Reaction scheme showing the synthesis of **3aa** from **2a** and **1a**. Reagents: Metal Salt (10 mol%),  $L_3\text{-PiPr}_2$  (10 mol%),  $\text{Rh}_2(\text{OAc})_4$  (2.5 mol%), DCE, 35 °C.

| entry <sup>[a]</sup> | Metal Salt           | yield [%] <sup>[b]</sup> | dr <sup>[c]</sup> | ee [%] <sup>[c]</sup> |
|----------------------|----------------------|--------------------------|-------------------|-----------------------|
| 1                    | Mg(OTf) <sub>2</sub> | 39                       | 81/19             | 97/90                 |
| 2                    | Fe(OTf) <sub>2</sub> | 68                       | 85/15             | 75/75                 |
| 3                    | Co(OTf) <sub>2</sub> | 71                       | 88/12             | 75/78                 |
| 4                    | Ni(OTf) <sub>2</sub> | 62                       | 72/28             | 85/90                 |
| 5                    | Cu(OTf) <sub>2</sub> | 60                       | 88/12             | 74/80                 |
| 6                    | Zn(OTf) <sub>2</sub> | 68                       | 76:24             | 98/95                 |
| 7                    | Sc(OTf) <sub>3</sub> | 48                       | 93:7              | 4/26                  |
| 8                    | Y(OTf) <sub>3</sub>  | 78                       | 75:25             | 4/38                  |
| 9                    | La(OTf) <sub>3</sub> | 25                       | 19:81             | 11/58                 |
| 10                   | Ce(OTf) <sub>4</sub> | 28                       | 10:90             | 9/20                  |
| 11                   | Ce(OTf) <sub>3</sub> | 56                       | 40:60             | 37/25                 |
| 12                   | Nd(OTf) <sub>3</sub> | 34                       | 19:81             | 36/75                 |
| 13                   | Sm(OTf) <sub>3</sub> | 60                       | 46:54             | 5/46                  |
| 14                   | Eu(OTf) <sub>3</sub> | 62                       | 73:27             | 2/45                  |
| 15                   | Gd(OTf) <sub>3</sub> | 82                       | 71:29             | 19:69                 |
| 16                   | Tb(OTf) <sub>3</sub> | 61                       | 77:23             | 1/35                  |
| 17                   | Dy(OTf) <sub>3</sub> | 60                       | 79:21             | 2/34                  |
| 18                   | Ho(OTf) <sub>3</sub> | 56                       | 76:24             | 4/30                  |
| 19                   | Er(OTf) <sub>3</sub> | 70                       | 74:26             | 3/30                  |
| 20                   | Tm(OTf) <sub>3</sub> | 70                       | 75:25             | 4/29                  |
| 21                   | Yb(OTf) <sub>3</sub> | 71                       | 53:47             | 15/56                 |

<sup>a</sup>The reactions were performed with **2a** (0.15 mmol), **1a** (0.10 mmol),  $\text{Rh}_2(\text{OAc})_4$  (2.5 mol%) and Metal Salt/ $L_3\text{-PiPr}_2$  (1:1, 10 mol%) in DCE (0.1 M) at 35 °C for 4 h under  $\text{N}_2$  atmosphere. <sup>b</sup>Yield of the isolated product. <sup>c</sup>Determined by HPLC analysis on a chiral stationary phase.

**Table S2** Optimization of Ligand

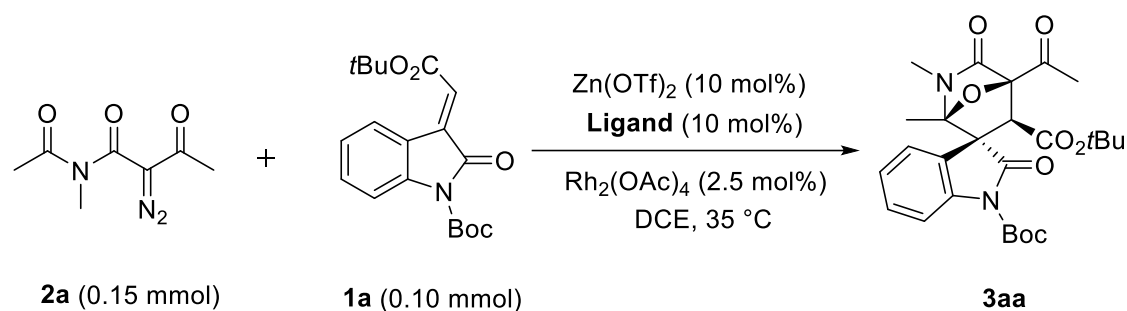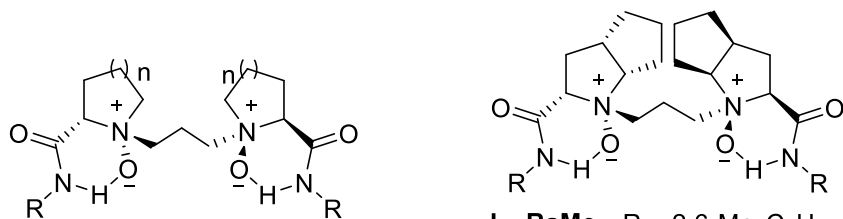

**L<sub>3</sub>-PrPr<sub>2</sub>**: R = 2,6-*i*-Pr<sub>2</sub>C<sub>6</sub>H<sub>3</sub>, n = 1

**L<sub>3</sub>-PiPr<sub>2</sub>**: R = 2,6-*i*-Pr<sub>2</sub>C<sub>6</sub>H<sub>3</sub>, n = 2

**L<sub>3</sub>-RaMe<sub>2</sub>**: R = 2,6-Me<sub>2</sub>C<sub>6</sub>H<sub>3</sub>

**L<sub>3</sub>-RaEt<sub>2</sub>**: R = 2,6-Et<sub>2</sub>C<sub>6</sub>H<sub>3</sub>

**L<sub>3</sub>-RaPr<sub>2</sub>**: R = 2,6-*i*-Pr<sub>2</sub>C<sub>6</sub>H<sub>3</sub>

**L<sub>3</sub>-RaEt<sub>2</sub>Me**: R = 2,6-Et<sub>2</sub>-4-MeC<sub>6</sub>H<sub>2</sub>

**L<sub>3</sub>-RaEt<sub>3</sub>**: R = 2,4,6-Et<sub>3</sub>C<sub>6</sub>H<sub>2</sub>

**L<sub>3</sub>-RaPr<sub>3</sub>**: R = 2,4,6-Pr<sub>3</sub>C<sub>6</sub>H<sub>2</sub>

| entry <sup>[a]</sup> | Ligand                                  | yield [%] <sup>[b]</sup> | dr <sup>[c]</sup> | ee [%] <sup>[c]</sup> |
|----------------------|-----------------------------------------|--------------------------|-------------------|-----------------------|
| 1                    | <b>L<sub>3</sub>-PrPr<sub>2</sub></b>   | 73                       | 75/25             | 95/93                 |
| 2                    | <b>L<sub>3</sub>-PiPr<sub>2</sub></b>   | 68                       | 76/24             | 98/95                 |
| 3                    | <b>L<sub>3</sub>-RaPr<sub>2</sub></b>   | 97                       | 66/34             | 97/94                 |
| 4                    | <b>L<sub>3</sub>-RaMe<sub>2</sub></b>   | 24                       | 80/20             | 98/95                 |
| 5                    | <b>L<sub>3</sub>-RaEt<sub>2</sub></b>   | 72                       | 85/15             | 98/97                 |
| 6                    | <b>L<sub>3</sub>-RaEt<sub>2</sub>Me</b> | 96                       | 89/11             | 98/90                 |
| 7                    | <b>L<sub>3</sub>-RaEt<sub>3</sub></b>   | 81                       | 89/11             | 98/90                 |
| 8                    | <b>L<sub>3</sub>-RaPr<sub>3</sub></b>   | 64                       | 85/15             | 97/85                 |

<sup>a</sup>The reactions were performed with **2a** (0.15 mmol), **1a** (0.10 mmol),  $\text{Rh}_2(\text{OAc})_4$  (2.5 mol%) and  $\text{Zn(OTf)}_2$ /**Ligand** (1:1, 10 mol%) in DCE (0.1 M) at 35 °C for 4 h under N<sub>2</sub> atmosphere. <sup>b</sup>Yield of the isolated product. <sup>c</sup>Determined by HPLC analysis on a chiral stationary phase.

**Table S3** Optimization of Temperature

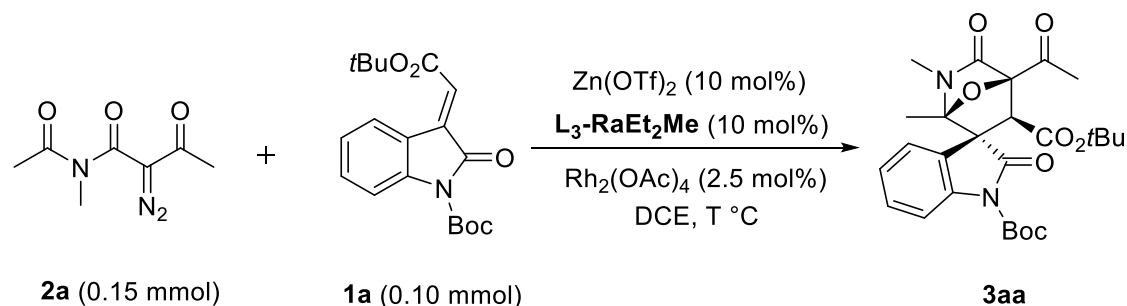

| Entry <sup>[a]</sup> | T [°C] | yield [%] <sup>[b]</sup> | dr <sup>[c]</sup> | ee [%] <sup>[c]</sup> |
|----------------------|--------|--------------------------|-------------------|-----------------------|
| 1 <sup>d</sup>       | 0      | 91                       | 84/16             | 95/97                 |
| 2 <sup>e</sup>       | 10     | 85                       | 83/17             | 98/98                 |
| 3                    | 20     | 87                       | 80/20             | 98/95                 |
| 4                    | 30     | 91                       | 84/16             | 97/92                 |
| 5                    | 35     | 96                       | 89/11             | 98/90                 |
| 6                    | 45     | 85                       | 95/5              | 95/-                  |

<sup>a</sup>The reactions were performed with **2a** (0.15 mmol), **1a** (0.10 mmol), Rh<sub>2</sub>(OAc)<sub>4</sub> (2.5 mol%) and Zn(OTf)<sub>2</sub>/L<sub>3</sub>-RaEt<sub>2</sub>Me (1:1, 10 mol%) in DCE (0.1 M) at T °C for 4 h under N<sub>2</sub> atmosphere. <sup>b</sup>Yield of the isolated product. <sup>c</sup>Determined by HPLC analysis on a chiral stationary phase. <sup>d</sup>The reactions was carried out in 15 h. <sup>e</sup>The reactions was carried out in 24 h.

**Table S4** Optimization of Solvent

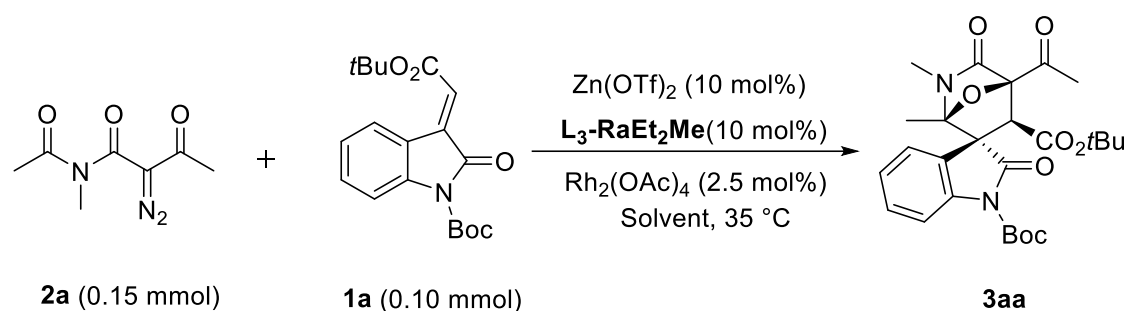

| Entry <sup>[a]</sup> | Solvent           | yield [%] <sup>[b]</sup> | dr <sup>[c]</sup> | ee [%] <sup>[c]</sup> |
|----------------------|-------------------|--------------------------|-------------------|-----------------------|
| 1                    | Et <sub>2</sub> O | 36                       | 96:4              | 93/54                 |
| 2                    | THF               | trace                    | -                 | -                     |
| 3                    | Toluene           | 54                       | 91:9              | 96/73                 |
| 4                    | DCM               | 63                       | 85:15             | 98/84                 |
| 5                    | CHCl <sub>3</sub> | 72                       | 87:13             | 98/90                 |
| 6                    | DCE               | 96                       | 89:11             | 98/90                 |
| 7                    | EA                | 18                       | 83:17             | 90/73                 |
| 8                    | MeCN              | N.R.                     | -                 | -                     |

<sup>a</sup>The reactions were performed with **2a** (0.15 mmol), **1a** (0.10 mmol), Rh<sub>2</sub>(OAc)<sub>4</sub> (2.5 mol%) and Zn(OTf)<sub>2</sub>/L<sub>3</sub>-RaEt<sub>2</sub>Me (1:1, 10 mol%) in Solvent (0.1 M) at 35 °C for 4 h under N<sub>2</sub> atmosphere. <sup>b</sup>Yield of the isolated product. <sup>c</sup>Determined by HPLC analysis on a chiral stationary phase.

**Table S5** Optimization of [Rh]

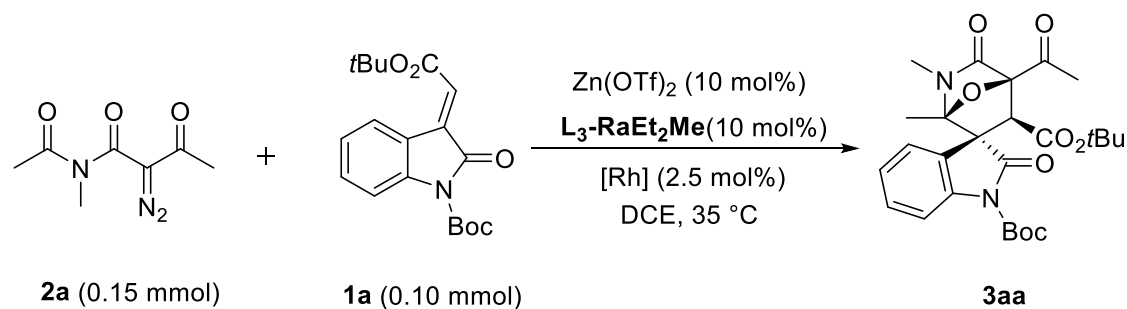

| Entry <sup>[a]</sup> | [Rh]                                                            | yield [%] <sup>[b]</sup> | dr <sup>[c]</sup> | ee [%] <sup>[c]</sup> |
|----------------------|-----------------------------------------------------------------|--------------------------|-------------------|-----------------------|
| 1                    | Rh <sub>2</sub> (OAc) <sub>4</sub>                              | 96                       | 89:11             | 98/90                 |
| 2                    | Rh <sub>2</sub> (CO <sub>2</sub> CF <sub>3</sub> ) <sub>4</sub> | 76                       | 88:12             | 98/90                 |
| 3                    | Rh <sub>2</sub> (Piv) <sub>4</sub>                              | 99                       | 78:22             | 98/91                 |
| 4                    | Rh <sub>2</sub> (Oct) <sub>4</sub>                              | 94                       | 90:10             | 98/90                 |
| 5 <sup>d</sup>       | Rh <sub>2</sub> (OAc) <sub>4</sub>                              | 64                       | 89:11             | 98/90                 |
| 6 <sup>d</sup>       | Rh <sub>2</sub> (Oct) <sub>4</sub>                              | 91                       | 90:10             | 98/90                 |

<sup>a</sup>The reactions were performed with **2a** (0.15 mmol), **1a** (0.10 mmol), [Rh] (2.5 mol%) and Zn(OTf)<sub>2</sub>/L<sub>3</sub>-RaEt<sub>2</sub>Me (1:1, 10 mol%) in Solvent (0.1 M) at 35 °C for 4 h under N<sub>2</sub> atmosphere. <sup>b</sup>Yield of the isolated product. <sup>c</sup>Determined by HPLC analysis on a chiral stationary phase. <sup>d</sup>[Rh] (0.5 mol%).

**Table S6** Optimization of the ratio of **2a** and **1a**

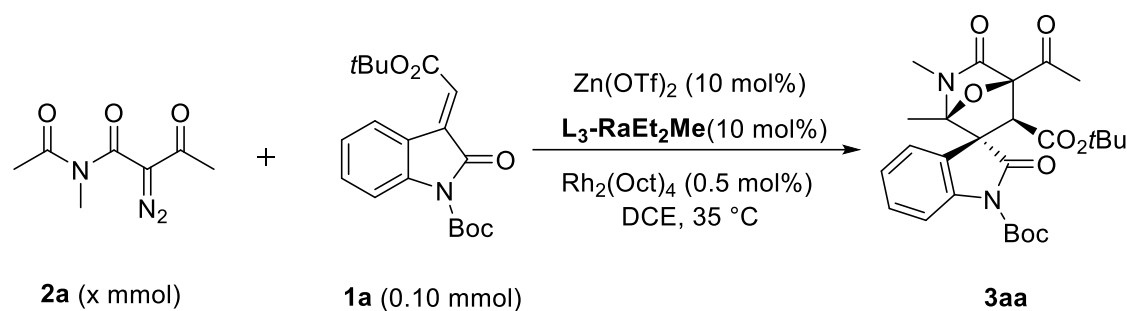

| Entry <sup>[a]</sup> | x (mmol) | yield [%] <sup>[b]</sup> | dr <sup>[c]</sup> | ee [%] <sup>[c]</sup> |
|----------------------|----------|--------------------------|-------------------|-----------------------|
| 1                    | 0.10     | 63                       | 98:2              | 98/90                 |
| 2                    | 0.11     | 72                       | 98:2              | 98/90                 |
| 4                    | 0.13     | 89                       | 98:2              | 98/90                 |
| 5 <sup>d</sup>       | 0.15     | 91                       | 89:11             | 98/90                 |
| 6 <sup>d</sup>       | 0.20     | 97                       | 83:17             | 95/90                 |

<sup>a</sup>The reactions were performed with **1a** (0.10 mmol), **2a** (x mmol), Rh<sub>2</sub>(Oct)<sub>4</sub> (0.5 mol%) and Zn(OTf)<sub>2</sub>/L<sub>3</sub>-RaEt<sub>2</sub>Me (1:1, 10 mol%) in Solvent (0.1 M) at 35 °C for 4 h under N<sub>2</sub> atmosphere. <sup>b</sup>Yield of the isolated product. <sup>c</sup>Determined by HPLC analysis on a chiral stationary phase.



**Table S8** Substrate Scope for Diazoimides<sup>a</sup>

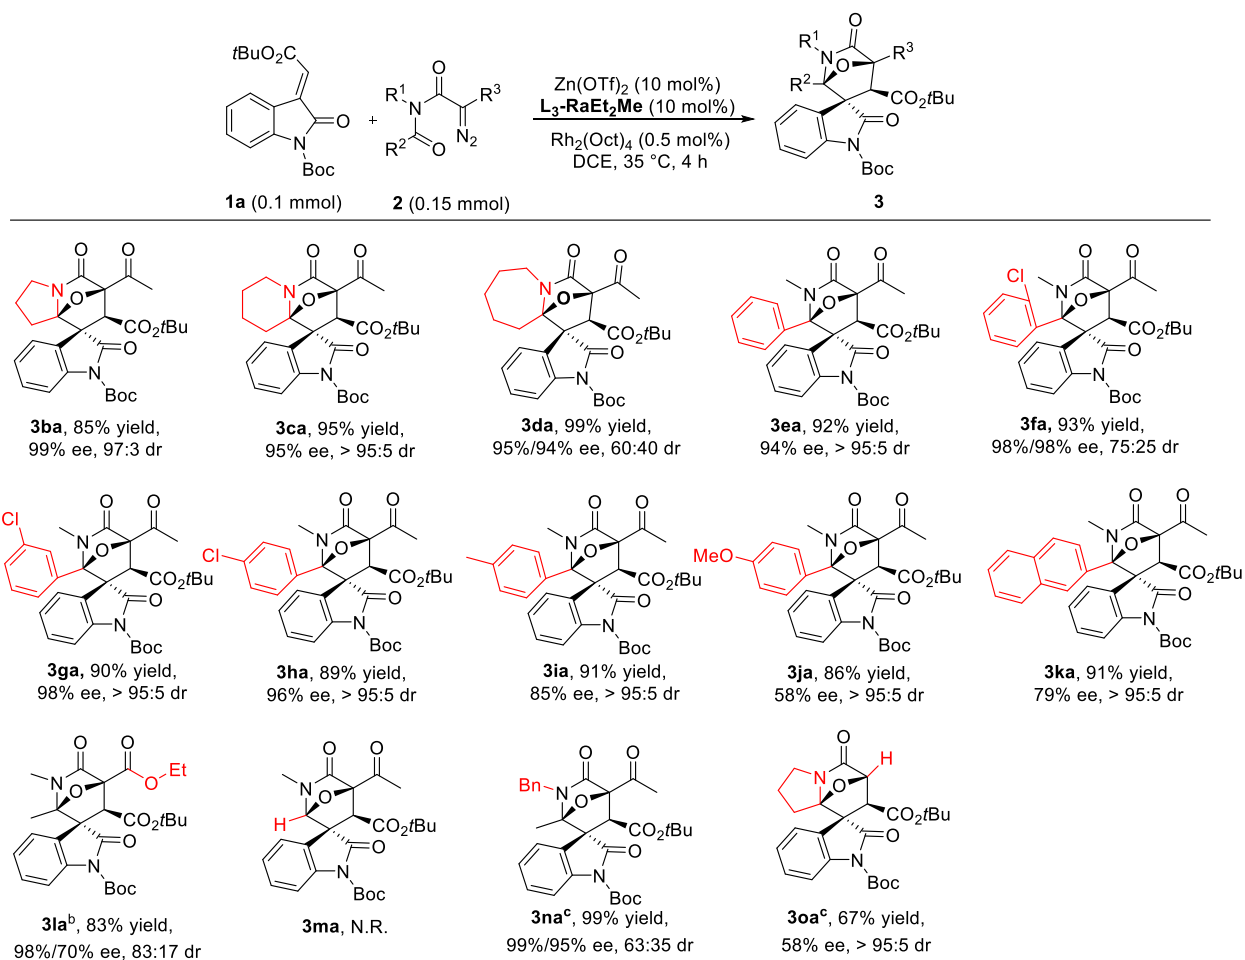

<sup>a</sup>Unless otherwise noted, all reactions were carried out with **1a** (0.10 mmol), **2** (0.15 mmol),  $\text{Rh}_2(\text{Oct})_4$  (0.5 mol%),  $\text{L}_3\text{-RaEt}_2\text{Me}/\text{Zn}(\text{OTf})_2$  (1:1, 10 mol%) in 1.0 mL DCE at 35 °C for 4 h. Diastereoselectivity ratios were determined by <sup>1</sup>H NMR analysis and ee values were determined by chiral HPLC analysis. <sup>b</sup>**2l** (0.13 mmol). <sup>c</sup>The reaction was treated at 10 °C for 10 h.

## 8. Experimental Procedures for Gram-Scale Synthesis and Derivatizations of **3ca**

### 8.1 Experimental Procedure for Gram-Scale Synthesis of **3ca**

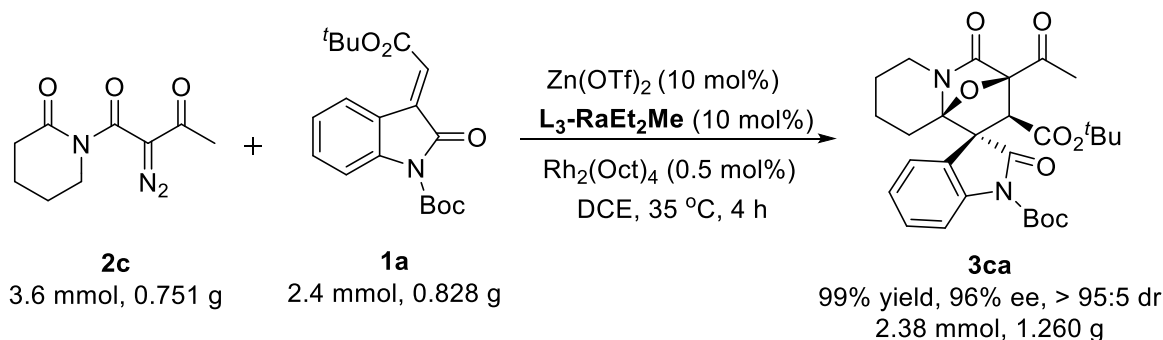

Procedure: An over dried 100 mL round-bottom flask charged with **2c** (0.751 g, 4.0 mmol), **1a** (0.828 g, 2.4 mmol),  $\text{Rh}_2(\text{Oct})_4$  (9.3 mg, 0.012 mmol, 0.5 mol%) and the catalyst  $\text{Zn}(\text{OTf})_2/\text{L}_3\text{-RaEt}_2\text{Me}$  (0.249 mg, 0.24 mmol, 10 mol%) in anhydrous DCE

(14.0 mL) under nitrogen atmosphere. Then Rh<sub>2</sub>(Oct)<sub>4</sub> (9.3 mg, 0.012 mmol, 0.5 mol%) dissolved in anhydrous DCE (10.0 mL) was added and the reaction was stirred at 35 °C for 4 h. After the reaction was completed, 25.0 mL water was added. The mixture was extracted by DCM, and the aqueous layer was washed with DCM (2 x 20.0 mL). The combined organic phases was washed with brine (20.0 mL), and dried over Na<sub>2</sub>SO<sub>4</sub>. After evaporation of the solvent, the residue was subjected to column chromatography on silica gel with petroleum ether/ethyl acetate = 2/1 (v/v). The product **3ca** was obtained in 99% yield (1.260 g) with 96% ee and > 95:5 dr.

## 8.2 Experimental Procedures for Derivatizations of **3ca**

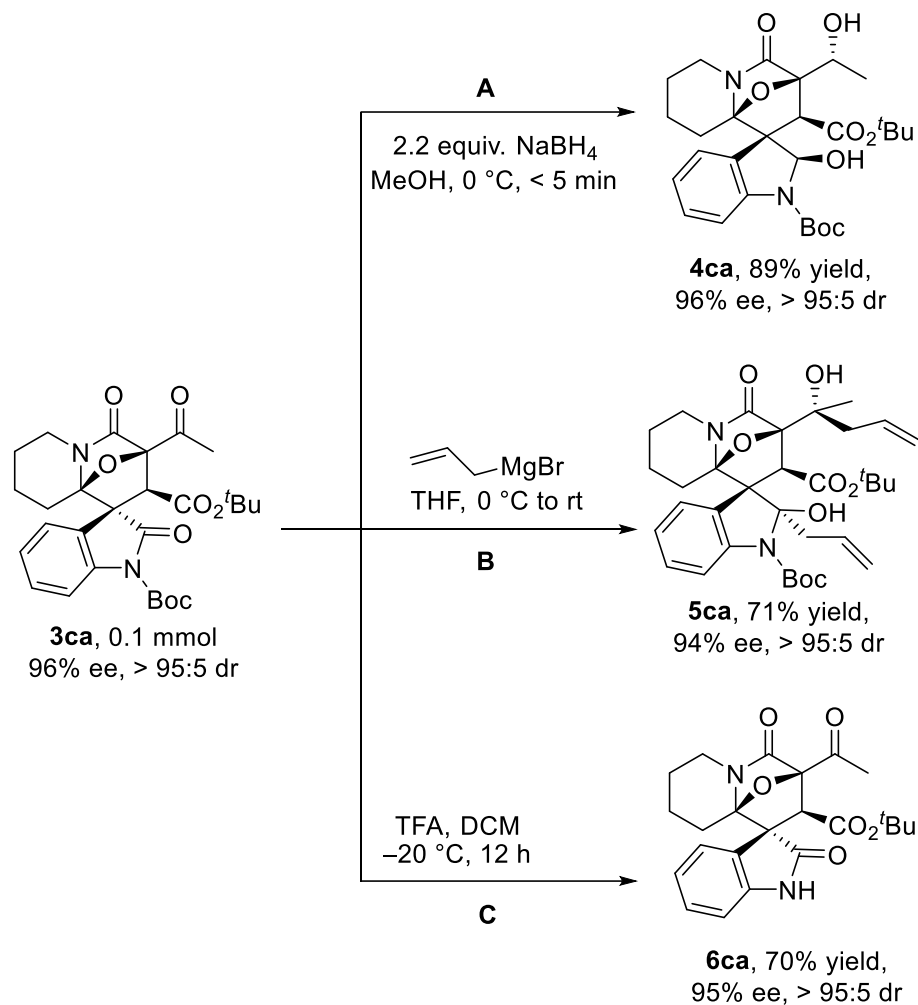

Procedure A: 52.6 mg (0.1 mmol) **3ca** was weighed into a reaction tube and 1.0 mL MeOH was added to dissolve the substrate. When the temperature was cooled down 0 °C, 8.5 mg (2.2 equiv.) NaBH<sub>4</sub> was added. After the reaction was completed, the solvent was evaporated under vacuum. Then, 2.0 mL water was added and the mixture was extracted by ethyl acetate. The organic phases was washed with brine (5.0 mL) and dried over Na<sub>2</sub>SO<sub>4</sub>. After evaporation of the solvent, the residue was subjected to column chromatography on silica gel with petroleum ether/ethyl acetate = 1/1 (v/v). The product **4ca** was obtained in 89% yield (47.1 mg) with 96% ee and > 95:5 dr. The newly generated chiral center was determined by X-ray diffraction crystal analysis (CCDC 2081111).

Procedure B: 52.6 mg (0.1 mmol) **3ca** was weighed into an oven-dried reaction tube. And then make sure it filled with nitrogen. Next, 1.0 ml anhydrous THF was added to dissolve the substrate. When the temperature was cooled down 0 °C, a solution of allyl magnesium bromide (0.22 mL, 0.22 mmol, 1.0 M in THF) was slowly added. The reaction was allowed to warm up to room



temperature. After the reaction was completed, a saturated aqueous solution of  $\text{NH}_4\text{Cl}$  (1 mL) was added. The mixture was extracted by ethyl acetate. The organic phases was washed with brine (5.0 mL), and dried over  $\text{Na}_2\text{SO}_4$ . After evaporation of the solvent, the residue was subjected to column chromatography on silica gel with petroleum ether/ethyl acetate = 1/1 (v/v). The product **5ca** was obtained in 71 % yield (43.2 mg) with 94% ee and > 95:5 dr.

Procedure C: 52.6 mg (0.1 mmol) **3ca** was weighted into a reaction tube and 1.0 mL DCM was added to dissolve the substrate. When the temperature was cooled down  $-20\text{ }^\circ\text{C}$ , 0.1 mL (10 equiv.) TFA (trifluoroacetic acid) was added slowly. After the reaction was completed, 10.0 mL water and 10 mL DCM was added. The mixture was treated by  $\text{K}_2\text{CO}_3$  until the PH value became over 8. And then the aqueous layer was washed with DCM (2 x 10.0 mL). The combined organic phases was washed with brine (5.0 mL), and dried over  $\text{Na}_2\text{SO}_4$ . After evaporation of the solvent, the residue was subjected to column chromatography on silica gel with petroleum ether/ethyl acetate = 1:1 (v/v). The product **6ca** was obtained in 70% yield (29.8 mg) with 95% ee and > 95:5 dr. The absolute configuration of the major enantiomer of **6ca** was determined by comparison of the CD spectra with that of **3aa**.

## 9. Operando IR experiments

Operando IR experiments were performed to determine the process of the reaction. Initially, the infrared absorption spectra of each reactant and product **3aa** in DCE were collected. The following figure shows the absorption of each participant minus the absorption of solvent. Peak at  $1477\text{ cm}^{-1}$  was identified as the characteristic absorption of product **3aa**. Peak at  $1461\text{ cm}^{-1}$  was for **1a** and Peak at  $1667\text{ cm}^{-1}$  was for **2a**.

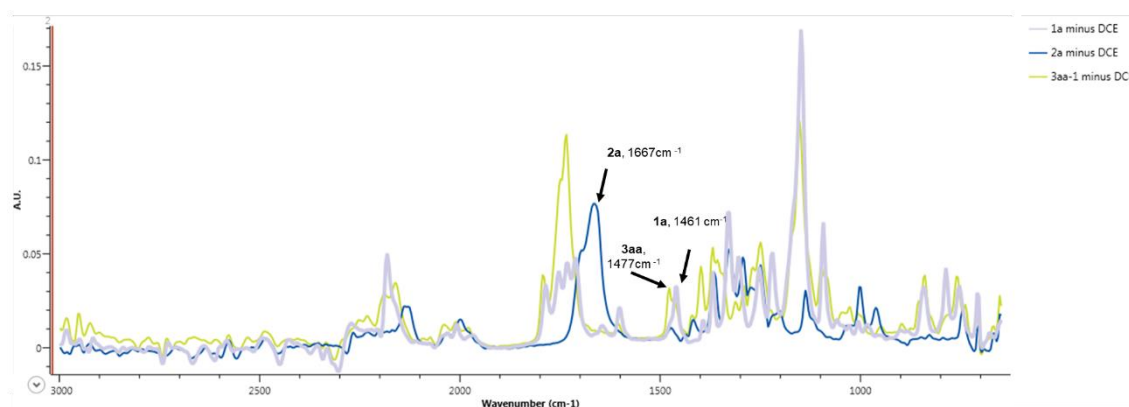

Figure1. The IR spectra of each component.

For the reaction, the solution of 0.39 mmol **2a** and 0.5 mol %  $\text{Rh}_2(\text{Oct})_4$  in the presence of 10 mol %  $\text{Zn}(\text{OTf})_2/\text{L}_3\text{-RaEt}_2\text{Me}$  was monitored firstly. Then, 0.30 mmol **1a** was added into the reaction system. A newly absorption peak at  $1704\text{ cm}^{-1}$  increased first and then decreased before and after adding the substrate **1a**. It implied that this newly generated species at  $1704\text{ cm}^{-1}$  could be the isomünchnone.

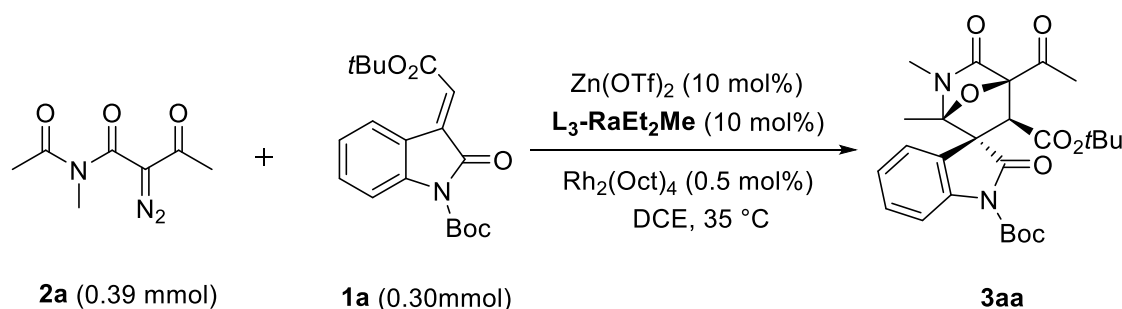

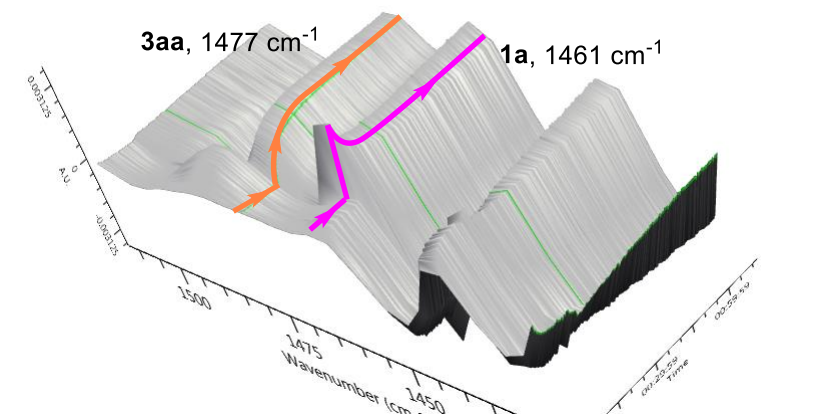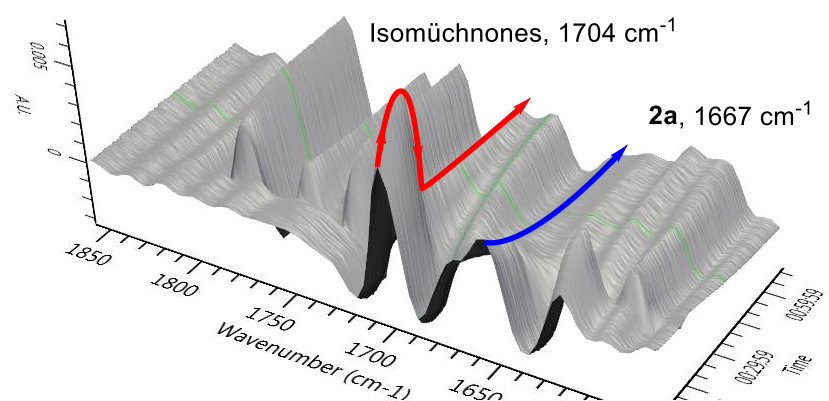

Figure 2. 3D ATR-FTIR profile of the catalytic asymmetric cascade reaction of each component.

The variation of peak height with reaction time represented the changing of concentration with reaction time. So comparison of the reaction rate could be detected by comparing the changing rate of peak height in both reactions. A formula shows the increasing of peak height of **3aa** with reaction time in Figure 3. Operando IR experiments show that the reaction with chiral Lewis acid has a much higher reaction rate than the reaction without Lewis acid.

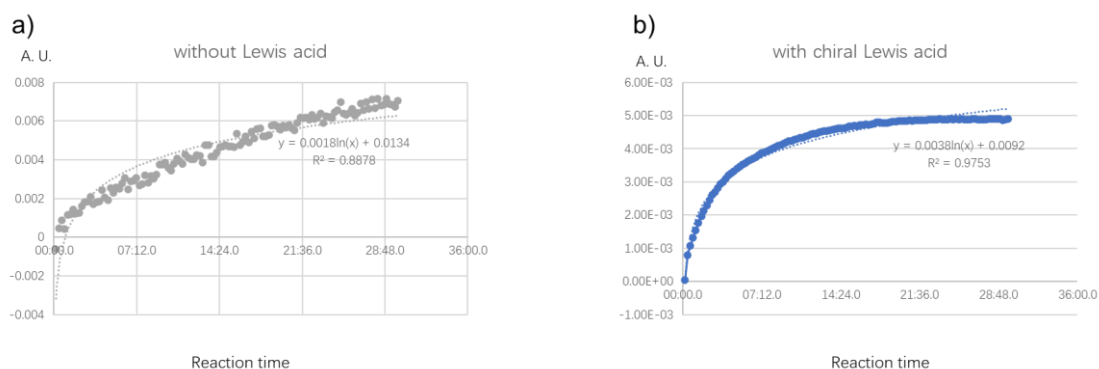

Figure 3. Variation of peak height with reaction time with chiral Lewis acid or without Lewis acid.

## 10. Crystal Data of Products

### 10.1 Crystal Data of Product 3aa

The absolute configuration of product **3aa** was determined to be (1*R*,2*R*,3*S*,4*R*) by X-ray chromatography analysis. Single crystal of **3aa** [C<sub>26</sub>H<sub>32</sub>N<sub>2</sub>O<sub>8</sub>] was obtained by recrystallization in hexane/DCM at room temperature. CCDC 2055996 contains the supplementary crystallographic data which can be obtained free of charge from The Cambridge Crystallographic Data Center.

The colourless crystal in block-shape, with approximate dimensions of 0.454 × 0.218 × 0.216 mm<sup>3</sup>, was selected and mounted for the single-crystal X-ray diffraction. The data set was collected by Bruker D8 Venture Photon II diffractometer at 170(2)K equipped with micro-focus Cu radiation source ( $K_{\alpha} = 1.54178\text{\AA}$ ). Applied with face-indexed numerical absorption correction, the structure solution was solved and refinement was processed by SHELXTL (version 6.14) and OLEX 2.3 program package<sup>a, b, c, d</sup>. Since attempts to refine peaks of residual electron density attributed by disordered or partial-occupancy solvent were unsuccessful, the data were corrected for unsolvable electron density using the SQUEEZE procedure as implemented in PLATON suite<sup>d</sup>. The structure was analyzed by ADDSYM routine implemented in PLATON suite and no higher symmetry was suggested<sup>e</sup>.

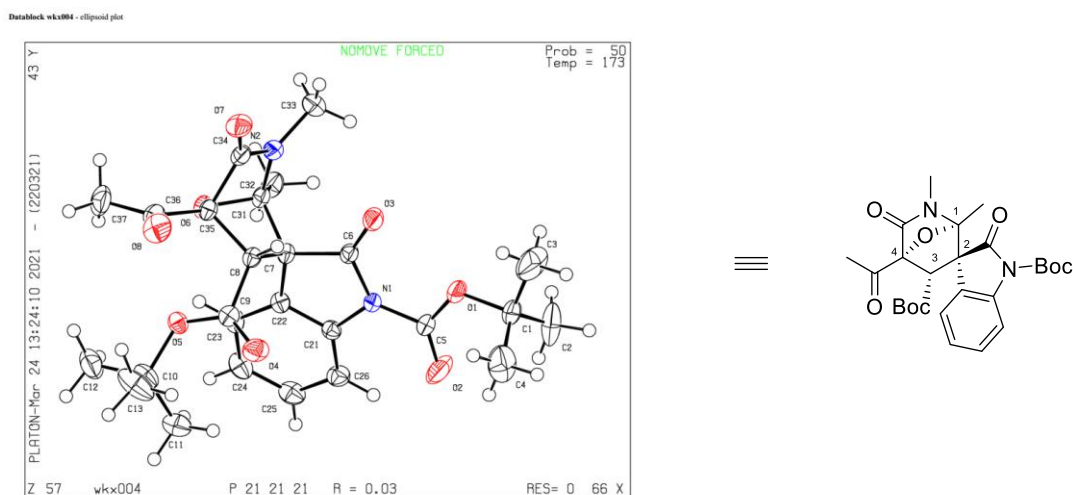

### Crystallographic Data for C<sub>26</sub>H<sub>32</sub>N<sub>2</sub>O<sub>8</sub>.

|                            |                                                               |
|----------------------------|---------------------------------------------------------------|
| Formula                    | C <sub>26</sub> H <sub>32</sub> N <sub>2</sub> O <sub>8</sub> |
| Formula mass (amu)         | 500.53                                                        |
| Space group                | P2 <sub>1</sub> 2 <sub>1</sub> 2 <sub>1</sub>                 |
| <i>a</i> (Å)               | 10.2902(3)                                                    |
| <i>b</i> (Å)               | 13.8257(4)                                                    |
| <i>c</i> (Å)               | 18.5139(6)                                                    |
| $\alpha$ (deg)             | 90                                                            |
| $\beta$ (deg)              | 90                                                            |
| $\gamma$ (deg)             | 90                                                            |
| <i>V</i> (Å <sup>3</sup> ) | 2633.96(14)                                                   |
| <i>Z</i>                   | 4                                                             |

|                                                   |             |
|---------------------------------------------------|-------------|
| $\lambda$ (Å)                                     | 1.54178     |
| $T$ (K)                                           | 173 K(2)    |
| $\rho_{\text{calcd}}$ (g cm <sup>-3</sup> )       | 1.262       |
| $\mu$ (mm <sup>-1</sup> )                         | 0.780       |
| Transmission factors                              | 0.765–0.904 |
| $\theta_{\text{max}}$ (deg)                       | 72.364      |
| No. of unique data, including $F_o^2 < 0$         | 5198        |
| No. of unique data, with $F_o^2 > 2\sigma(F_o^2)$ | 5182        |
| No. of variables                                  | 334         |
| $R(F)$ for $F_o^2 > 2\sigma(F_o^2)$ <sup>a</sup>  | 0.0277      |
| $R_w(F_o^2)$ <sup>b</sup>                         | 0.0736      |
| Goodness of fit                                   | 1.081       |

$$^a R(F) = \sum ||F_o| - |F_c|| / \sum |F_o|.$$

$$^b R_w(F_o^2) = [\sum [w(F_o^2 - F_c^2)^2] / \sum wF_o^4]^{1/2}; w^{-1} = [\sigma^2(F_o^2) + (Ap)^2 + Bp], \text{ where } p = [\max(F_o^2, 0) + 2F_c^2] / 3.$$

## 10.2 Crystal Data of Product 4ca

The absolute configuration of product **4ca** and the newly generated hydroxy chiral center was determined to be (2*R*,2'*S*,3*S*,3'*R*,9*a*'*R*) and (*R*) by X-ray chromatography analysis. Single crystal of **4ca** [C<sub>28</sub>H<sub>38</sub>N<sub>2</sub>O<sub>8</sub>] was obtained by recrystallization in *d*<sub>4</sub>-MeOH at room temperature. CCDC 2081111 contains the supplementary crystallographic data which can be obtained free of charge from The Cambridge Crystallographic Data Center.

The colourless crystal in flake-shape, with approximate dimensions of 0.200 × 0.308 × 0.743 mm<sup>3</sup>, was selected and mounted for the single-crystal X-ray diffraction. The data set was collected by Bruker D8 Venture Photon II diffractometer at 173(2)K equipped with micro-focus Cu radiation source ( $K_{\alpha} = 1.54178\text{\AA}$ ). Applied with face-indexed numerical absorption correction, the structure solution was solved and refinement was processed by SHELXTL (version 6.14) and OLEX 2.3 program package<sup>a, b, c, d</sup>. The structure was analyzed by ADDSYM routine implemented in PLATON suite and no higher symmetry was suggested<sup>e</sup>.

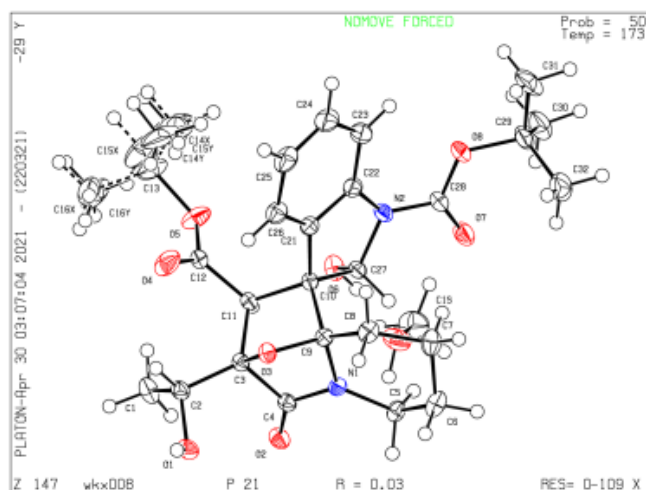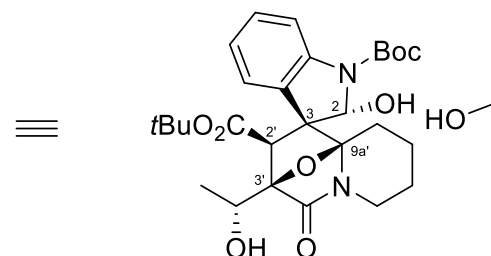

### Crystallographic Data for C<sub>29</sub>H<sub>42</sub>N<sub>2</sub>O<sub>9</sub>

|                                                                                                                      |                                                               |
|----------------------------------------------------------------------------------------------------------------------|---------------------------------------------------------------|
| Formula                                                                                                              | C <sub>29</sub> H <sub>42</sub> N <sub>2</sub> O <sub>9</sub> |
| Formula mass (amu)                                                                                                   | 562.64                                                        |
| Space group                                                                                                          | P2 <sub>1</sub>                                               |
| <i>a</i> (Å)                                                                                                         | 9.7907(5)                                                     |
| <i>b</i> (Å)                                                                                                         | 11.0235(6)                                                    |
| <i>c</i> (Å)                                                                                                         | 14.4145(8)                                                    |
| <i>α</i> (deg)                                                                                                       | 90                                                            |
| <i>β</i> (deg)                                                                                                       | 107.747(2)                                                    |
| <i>γ</i> (deg)                                                                                                       | 90                                                            |
| <i>V</i> (Å <sup>3</sup> )                                                                                           | 1481.69(14)                                                   |
| <i>Z</i>                                                                                                             | 2                                                             |
| <i>λ</i> (Å)                                                                                                         | 1.54178                                                       |
| <i>T</i> (K)                                                                                                         | 173 K(2)                                                      |
| <i>ρ</i> <sub>calcd</sub> (g cm <sup>-3</sup> )                                                                      | 1.261                                                         |
| <i>μ</i> (mm <sup>-1</sup> )                                                                                         | 0.772                                                         |
| Transmission factors                                                                                                 | 0.689–1.000                                                   |
| 2 <i>θ</i> <sub>max</sub> (deg)                                                                                      | 68.376                                                        |
| No. of unique data, including <i>F</i> <sub>o</sub> <sup>2</sup> < 0                                                 | 5382                                                          |
| No. of unique data, with <i>F</i> <sub>o</sub> <sup>2</sup> > 2σ( <i>F</i> <sub>o</sub> <sup>2</sup> )               | 5310                                                          |
| No. of variables                                                                                                     | 412                                                           |
| <i>R</i> ( <i>F</i> ) for <i>F</i> <sub>o</sub> <sup>2</sup> > 2σ( <i>F</i> <sub>o</sub> <sup>2</sup> ) <sup>a</sup> | 0.0311                                                        |
| <i>R</i> <sub>w</sub> ( <i>F</i> <sub>o</sub> <sup>2</sup> ) <sup>b</sup>                                            | 0.0807                                                        |

$$^a R(F) = \sum ||F_o| - |F_c|| / \sum |F_o|.$$

$$^b R_w(F_o^2) = [\sum [w(F_o^2 - F_c^2)^2] / \sum wF_o^4]^{1/2}; w^{-1} = [\sigma^2(F_o^2) + (Ap)^2 + Bp], \text{ where } p = [\max(F_o^2, 0) + 2F_c^2] / 3.$$

## References:

<sup>a</sup> Sheldrick, G. M. *Acta Cryst.* **2008**, *A64*, 112–122.

<sup>b</sup> Sheldrick, G. M. *Acta Cryst.* **2015**, *A71*, 3–8.

<sup>c</sup> Sheldrick, G. M. *Acta Cryst.* **2015**, *C71*, 3–8.

<sup>d</sup> Dolomanov, O.V., Bourhis, L.J., Gildea, R.J., Howard, J. A. K., Puschmann, H. *J. Appl. Cryst.* **2009**, *42*, 339-341.

<sup>e</sup> Spek, A. L. *J. Appl. Cryst.* **2003**, *36*, 7–13.

## 11. Characterization of Products

Tips: All of the spiro piperidine oxindole products (**3aa-3aq**, **3ba-3oa**, **4ca**, **5ca**, **6ca**) will decompose in high temperature under air so that the melting points can't be obtained veritably. (**3aa-3aq**, **3ba-3da**, **3la-3oa**, **6ca** will decompose above 130 °C; **3ea-3ka** will decompose above 60 °C; **4ca** and **5ca** will decompose around 100 °C)

### Di-*tert*-butyl (1*R*,2*R*,3*S*,4*R*)-4-acetyl-1,6-dimethyl-2',5-dioxo-7-oxa-6-azaspiro[bicyclo[2.2.1]heptane-2,3'-indoline]-1',3-dicarboxylate

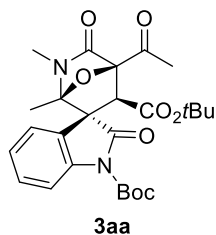

White solid; 89% yield, 98% ee, 98:2 dr; 44.6 mg;  $[\alpha]_D^{19} = -73.0$  ( $c = 0.20$ ,  $\text{CH}_2\text{Cl}_2$ ); determined by HPLC analysis [Daicel chiralpak IG, *n*-hexane/*i*-PrOH = 70/30, 1.0 mL/min,  $\lambda = 230$  nm,  $t_1 = 8.01$  min,  $t_2 = 8.98$  min,  $t_3 = 10.10$  min,  $t_4 = 12.20$  min].

$^1\text{H NMR}$  (400 MHz,  $\text{CDCl}_3$ )  $\delta$  7.81 (d,  $J = 8.2$  Hz, 1H), 7.40 (d,  $J = 7.6$  Hz, 1H), 7.36 (t,  $J = 8.4$  Hz, 1H), 7.15 (t,  $J = 7.6$  Hz, 1H), 3.83 (s, 1H), 2.89 (s, 3H), 2.45 (s, 3H), 1.63 (s, 9H), 1.30 (s, 3H), 0.92 (s, 9H).

$^{13}\text{C NMR}$  (101 MHz,  $\text{CDCl}_3$ )  $\delta$  198.49, 171.90, 168.74, 166.35, 148.64, 140.34, 129.87, 126.46, 124.93, 124.84, 114.81, 98.29, 90.87, 85.33, 83.10, 77.48, 77.16, 76.84, 63.43, 60.02, 28.17, 28.02, 27.68, 27.38,

14.69.

ESI-HRMS calcd for  $[\text{C}_{26}\text{H}_{32}\text{N}_2\text{O}_8 + \text{H}^+]$ : 501.2231, found 501.2235.

IR (film):  $\tilde{\nu}$  ( $\text{cm}^{-1}$ ) 2981, 2937, 2362, 2334, 1793, 1739, 1471, 1399, 1363, 1267, 1153, 1094, 1030, 892, 845, 756.

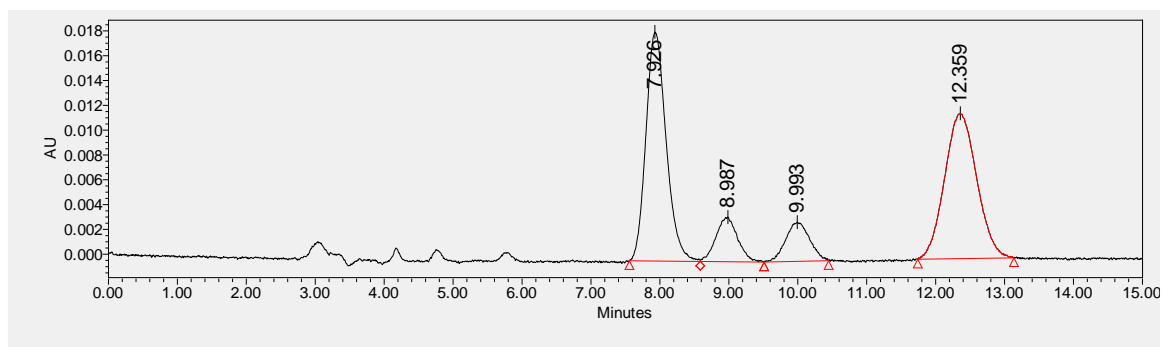

|   | Retention Time | Area   | % Area |
|---|----------------|--------|--------|
| 1 | 7.926          | 375847 | 41.32  |
| 2 | 8.987          | 78579  | 8.64   |
| 3 | 9.993          | 76616  | 8.42   |
| 4 | 12.359         | 378632 | 41.62  |

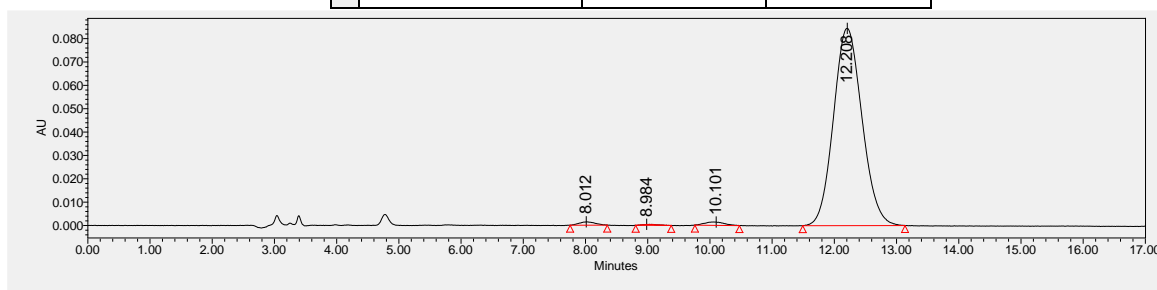

|   | Retention Time | Area  | % Area |
|---|----------------|-------|--------|
| 1 | 8.012          | 25969 | 0.94   |
| 2 | 8.984          | 6792  | 0.25   |
| 3 | 10.101         | 32062 | 1.17   |

|   |        |         |       |
|---|--------|---------|-------|
| 4 | 12.208 | 2686641 | 97.64 |
|---|--------|---------|-------|

**1'-(*Tert*-butyl) 3-methyl (1*R*,2*R*,3*S*,4*R*)-4-acetyl-1,6-dimethyl-2',5-dioxo-7-oxa-6-azaspiro[bicyclo[2.2.1]heptane-2,3'-indoline]-1',3-dicarboxylate**

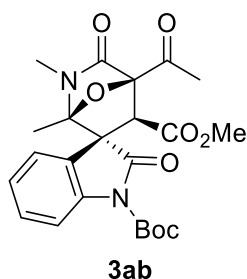

White solid; 63% yield (*exo*), 94% ee, 85:15 dr (determined by raw <sup>1</sup>H NMR spectra of reaction mixture); 29.0 mg; [ $\alpha$ ]<sub>D</sub><sup>22</sup> = -105.5 (*c* 0.20, CH<sub>2</sub>Cl<sub>2</sub>); determined by HPLC analysis [Daicel chiralpak IF, *n*-hexane/*i*-PrOH = 80/20, 1.0 mL/min,  $\lambda$  = 230 nm, *t*<sub>1</sub> = 16.00 min, *t*<sub>2</sub> = 17.85 min].

<sup>1</sup>H NMR (400 MHz, CDCl<sub>3</sub>)  $\delta$  7.84 (d, *J* = 8.2 Hz, 1H), 7.37 (t, *J* = 7.9 Hz, 1H), 7.29 (d, *J* = 7.5 Hz, 1H), 7.16 (t, *J* = 7.5 Hz, 1H), 3.91 (s, 1H), 3.15 (s, 3H), 2.87 (s, 3H), 2.46 (s, 3H), 1.64 (s, 9H), 1.28 (s, 3H).

<sup>13</sup>C NMR (101 MHz, CDCl<sub>3</sub>)  $\delta$  199.09, 171.53, 168.38, 168.24, 148.74, 140.00, 130.05, 125.17, 124.85, 124.74, 114.99, 98.82, 91.20, 85.54, 77.48, 77.16, 76.84, 63.45, 58.75, 52.54, 28.24, 28.01, 27.77, 14.72.

ESI-HRMS calcd for [C<sub>23</sub>H<sub>26</sub>N<sub>2</sub>O<sub>8</sub>+H<sup>+</sup>]: 459.1762, found 459.1760;

IR (film):  $\tilde{\nu}$  (cm<sup>-1</sup>) 3006, 2985, 2360, 2341, 1748, 1653, 1558, 1541, 1507, 1457, 1275, 1260, 1152, 764, 420.

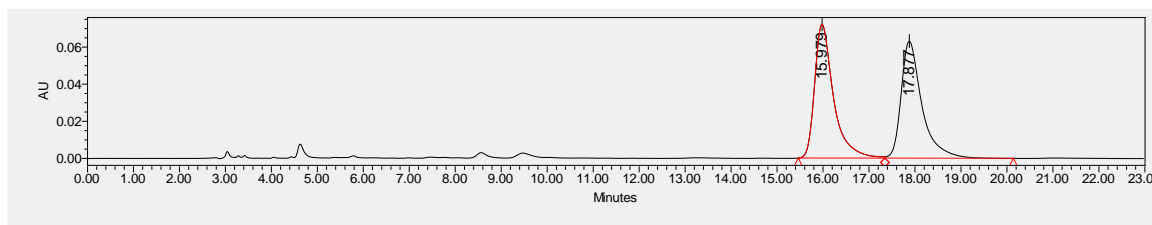

|   | Retention Time | Area    | % Area |
|---|----------------|---------|--------|
| 1 | 15.979         | 2053883 | 50.99  |
| 2 | 17.877         | 1973985 | 49.01  |

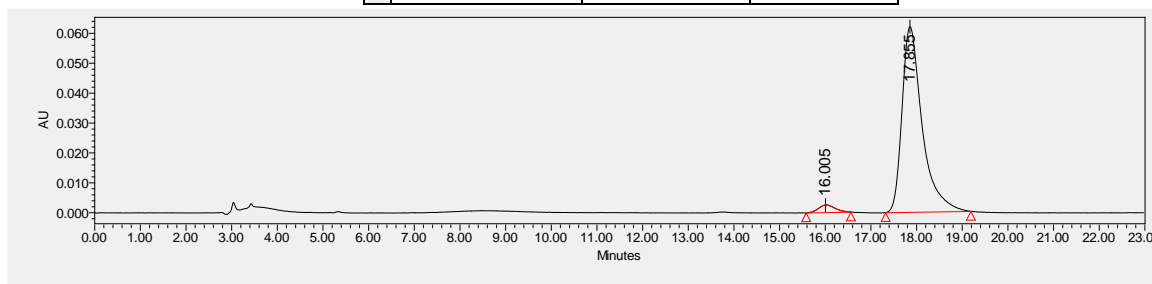

|   | Retention Time | Area    | % Area |
|---|----------------|---------|--------|
| 1 | 16.005         | 64728   | 3.21   |
| 2 | 17.855         | 1904136 | 96.79  |

**1'-(*Tert*-butyl) 3-ethyl (1*R*,2*R*,3*S*,4*R*)-4-acetyl-1,6-dimethyl-2',5-dioxo-7-oxa-6-azaspiro[bicyclo[2.2.1]heptane-2,3'-indoline]-1',3-dicarboxylate**

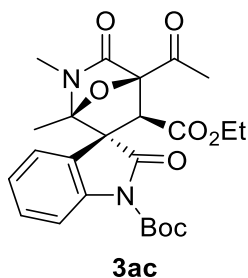

White solid; 75% yield (*exo*), 96% ee, 87:13 dr (determined by raw <sup>1</sup>H NMR spectra of reaction mixture); 35.3 mg; [ $\alpha$ ]<sub>D</sub><sup>21</sup> = -115.5 (*c* 0.20, CH<sub>2</sub>Cl<sub>2</sub>); determined by HPLC analysis [Daicel chiralpak IG, *n*-hexane/*i*-PrOH = 70/30, 1.0 mL/min,  $\lambda$  = 230 nm, *t*<sub>1</sub> = 13.38 min, *t*<sub>2</sub> = 15.76 min].

<sup>1</sup>H NMR (400 MHz, CDCl<sub>3</sub>)  $\delta$  7.80 (d, *J* = 8.2 Hz, 1H), 7.35 (t, *J* = 8.5 Hz, 1H), 7.31 (d, *J* = 7.6 Hz, 1H), 7.13 (t, *J* = 7.6 Hz, 1H), 3.87 (s, 1H), 3.70 – 3.52 (m, 2H), 2.86 (s, 3H), 2.45 (s, 3H), 1.62 (s, 9H), 1.27 (s, 3H), 0.61 (t, *J* = 7.1 Hz, 3H).



$^{13}\text{C}$  NMR (101 MHz,  $\text{CDCl}_3$ )  $\delta$  198.94, 171.64, 168.32, 167.72, 148.64, 140.10, 129.97, 125.47, 124.83, 124.71, 114.87, 98.63, 91.04, 85.47, 77.48, 77.16, 76.84, 63.41, 61.80, 58.90, 28.18, 27.98, 27.71, 14.69, 13.42.

ESI-HRMS calcd for  $[\text{C}_{24}\text{H}_{28}\text{N}_2\text{O}_8+\text{H}^+]$ : 473.1918, found 473.1921;

IR (film):  $\tilde{\nu}$  ( $\text{cm}^{-1}$ ) 3004, 2985, 2941, 2360, 2340, 1794, 1740, 1718, 1478, 1466, 1458, 1400, 1371, 1349, 1275, 1260, 1172, 1152, 764.

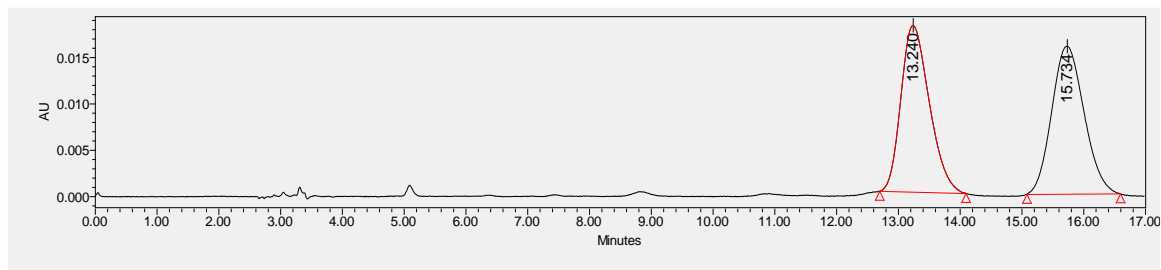

|   | Retention Time | Area   | % Area |
|---|----------------|--------|--------|
| 1 | 13.240         | 574388 | 49.72  |
| 2 | 15.734         | 580939 | 50.28  |

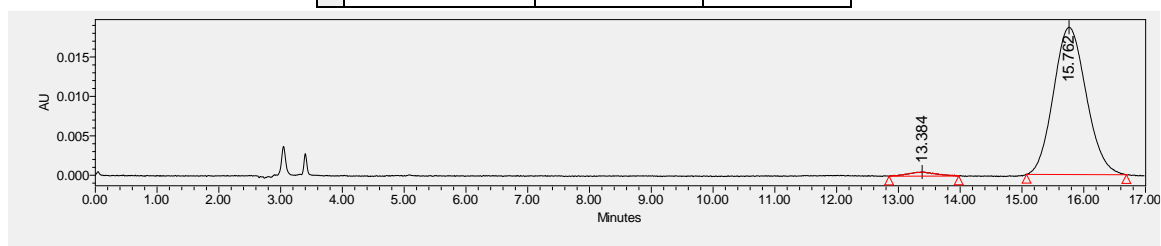

|   | Retention Time | Area   | % Area |
|---|----------------|--------|--------|
| 1 | 13.384         | 16485  | 2.25   |
| 2 | 15.762         | 685753 | 97.75  |

**1'-(*Tert*-butyl) 3-isopropyl (1*R*,2*R*,3*S*,4*R*)-4-acetyl-1,6-dimethyl-2',5-dioxo-7-oxa-6-azaspiro[bicyclo[2.2.1]heptane-2,3'-indoline]-1',3-dicarboxylate**

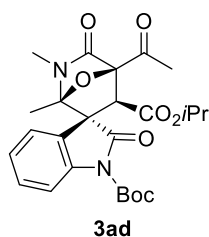

White solid; 67% yield (*exo*), 96% ee, 83:17 dr (determined by raw  $^1\text{H}$  NMR spectra of reaction mixture); 32.6 mg;  $[\alpha]^{22}_{\text{D}} = -103.5$  (*c* 0.20,  $\text{CH}_2\text{Cl}_2$ ); determined by HPLC analysis [Daicel chiralpak IF, *n*-hexane/*i*-PrOH = 80/20, 1.0 mL/min,  $\lambda = 230$  nm,  $t_1 = 16.00$  min,  $t_2 = 17.85$  min].

$^1\text{H}$  NMR (400 MHz,  $\text{CDCl}_3$ )  $\delta$  7.81 (d,  $J = 8.0$  Hz, 1H), 7.36 (m, 2H), 7.15 (t,  $J = 7.6$  Hz, 1H), 4.48 (m, 1H), 3.86 (s, 1H), 2.88 (s, 3H), 2.46 (s, 3H), 1.64 (s, 10H), 1.28 (s, 3H), 1.00 (d,  $J = 6.3$  Hz, 3H), 0.36 (d,  $J = 6.3$  Hz, 3H).

$^{13}\text{C}$  NMR (101 MHz,  $\text{CDCl}_3$ )  $\delta$  198.77, 171.58, 168.23, 167.04, 148.46, 140.02, 129.77, 125.59, 124.73, 124.54, 114.73, 98.42, 90.85, 85.28, 77.32, 77.00, 76.68, 69.79, 63.25, 58.87, 28.02, 27.85, 27.55, 21.55, 20.30, 14.51.

ESI-HRMS calcd for  $[\text{C}_{25}\text{H}_{30}\text{N}_2\text{O}_8+\text{H}^+]$ : 487.2075, found 487.2077;

IR (film):  $\tilde{\nu}$  ( $\text{cm}^{-1}$ ) 2984, 2939, 2362, 2334, 1793, 1742, 1468, 1399, 1369, 1347, 1268, 1204, 1151, 1102, 755.

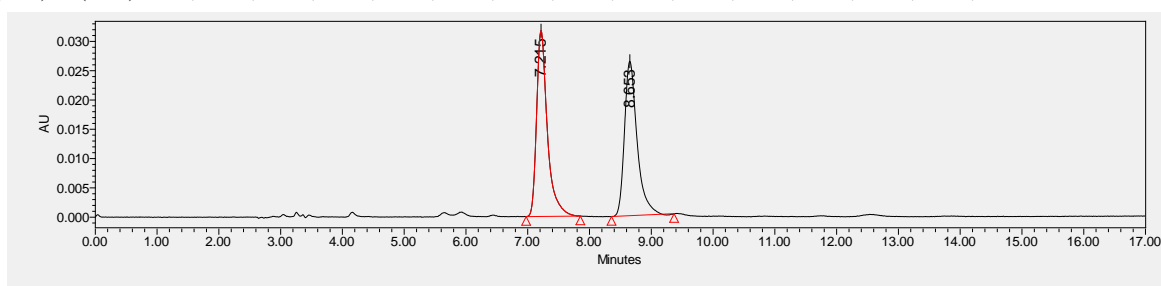

|   | Name | Retention Time | Area   | % Area |
|---|------|----------------|--------|--------|
| 1 |      | 7.215          | 383718 | 50.59  |
| 2 |      | 8.653          | 374808 | 49.41  |

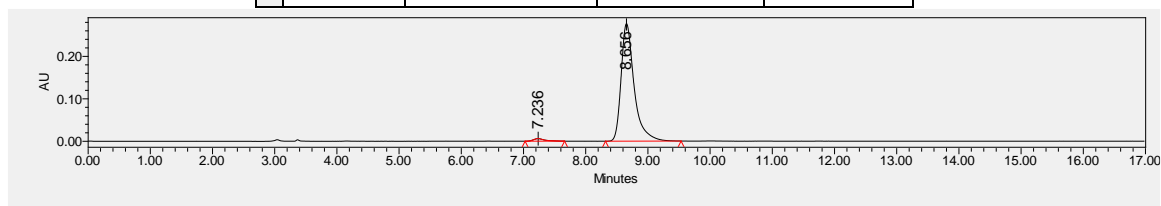

|   | Name | Retention Time | Area    | % Area |
|---|------|----------------|---------|--------|
| 1 |      | 7.236          | 77446   | 1.89   |
| 2 |      | 8.656          | 4029927 | 98.11  |

**3-Benzyl 1'-(*tert*-butyl) (1*R*,2*R*,3*S*,4*R*)-4-acetyl-1,6-dimethyl-2',5-dioxo-7-oxa-6-azaspiro[bicyclo[2.2.1]heptane-2,3'-indoline]-1',3-dicarboxylate**

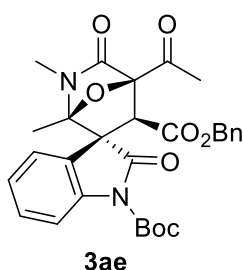

White solid; 60% yield (*exo*), 97% ee, 84:16 dr (determined by raw <sup>1</sup>H NMR spectra of reaction mixture); 32.1 mg; [ $\alpha$ ]<sub>D</sub><sup>21</sup> = -97.5 (*c* 0.20, CH<sub>2</sub>Cl<sub>2</sub>); determined by HPLC analysis [Daicel chiralpak IF, *n*-hexane/*i*-PrOH = 70/30, 1.0 mL/min,  $\lambda$  = 230 nm, *t*<sub>1</sub> = 10.29 min, *t*<sub>2</sub> = 16.15 min].

<sup>1</sup>H NMR (400 MHz, CDCl<sub>3</sub>)  $\delta$  7.79 (d, *J* = 8.1 Hz, 1H), 7.37 – 7.31 (m, 2H), 7.24 – 7.15 (m, 3H), 7.12 (t, *J* = 7.9 Hz, 1H), 6.77 (d, *J* = 6.7 Hz, 2H), 4.68 (d, *J* = 11.9 Hz, 1H), 4.36 (d, *J* = 11.9 Hz, 1H), 3.94 (s, 1H), 2.88 (s, 3H), 2.46 (s, 3H), 1.61 (s, 9H), 1.28 (s, 3H).

<sup>13</sup>C NMR (101 MHz, CDCl<sub>3</sub>)  $\delta$  198.93, 171.51, 168.23, 167.65, 148.50, 140.06, 134.08, 130.06, 128.50, 128.46, 125.34, 124.87, 124.58, 115.02, 98.71, 91.07, 85.39, 77.48, 77.16, 76.84, 67.84, 63.40,

58.79, 28.15, 28.00, 27.74, 14.66.

**ESI-HRMS** calcd for [C<sub>29</sub>H<sub>30</sub>N<sub>2</sub>O<sub>8</sub>+H<sup>+</sup>]: 535.2075, found 535.2076;

**IR** (film):  $\tilde{\nu}$  (cm<sup>-1</sup>) 2983, 2941, 2362, 2334, 1792, 1744 1468, 1399, 1348, 1267, 1151, 1092, 1027, 1004, 899, 844, 755, 704.

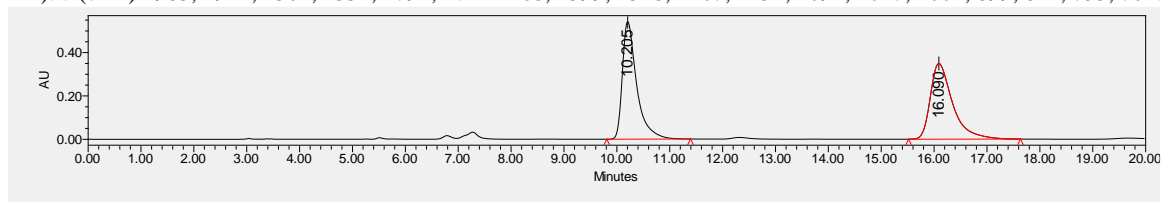

|   | Retention Time | Area     | % Area |
|---|----------------|----------|--------|
| 1 | 10.205         | 10200089 | 49.97  |
| 2 | 16.090         | 10210732 | 50.03  |

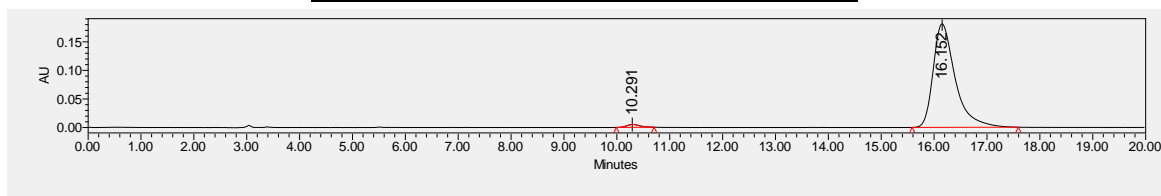

|   | Retention Time | Area    | % Area |
|---|----------------|---------|--------|
| 1 | 10.291         | 84165   | 1.58   |
| 2 | 16.152         | 5238274 | 98.42  |

**Di-*tert*-butyl (1*R*,2*R*,3*S*,4*R*)-4-acetyl-5'-chloro-1,6-dimethyl-2',5-dioxo-7-oxa-6-azaspiro[bicyclo[2.2.1]heptane-2,3'-indoline]-1',3-dicarboxylate**

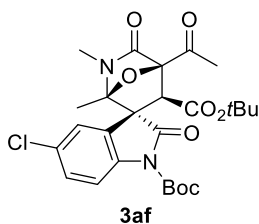

White solid; 86% yield, 97% ee, > 95:5 dr; 46.0 mg;  $[\alpha]_D^{21} = -45.6$  (*c* 0.068, CH<sub>2</sub>Cl<sub>2</sub>); determined by HPLC analysis [Daicel chiralpak IG, *n*-hexane/*i*-PrOH = 80/20, 1.0 mL/min,  $\lambda = 230$  nm,  $t_1 = 13.22$  min,  $t_2 = 15.25$  min].

<sup>1</sup>H NMR (400 MHz, CDCl<sub>3</sub>)  $\delta$  7.82 (d, *J* = 8.7 Hz, 1H), 7.40 (d, *J* = 2.2 Hz, 1H), 7.36 (dd, *J* = 8.7, 2.3 Hz, 1H), 3.83 (s, 1H), 2.90 (s, 3H), 2.47 (s, 3H), 1.64 (s, 10H), 1.34 (s, 3H), 1.02 (s, 9H).

<sup>13</sup>C NMR (101 MHz, CDCl<sub>3</sub>)  $\delta$  198.28, 171.17, 168.54, 166.14, 148.50, 138.82, 130.67, 129.90, 126.66, 126.36, 116.14, 100.13, 98.34, 91.10, 85.77, 83.67, 77.48, 77.16, 76.84, 63.47, 59.87, 28.17, 28.07, 27.72, 27.43, 14.78.

**ESI-HRMS** calcd for [C<sub>26</sub>H<sub>31</sub><sup>34.9689</sup>ClN<sub>2</sub>O<sub>8</sub>+Na<sup>+</sup>]: 557.1661, found 557.1653; **ESI-HRMS** calcd for [C<sub>26</sub>H<sub>31</sub><sup>36.9659</sup>ClN<sub>2</sub>O<sub>8</sub>+Na<sup>+</sup>]: 559.1632, found 559.1641;

**IR** (film):  $\tilde{\nu}$  (cm<sup>-1</sup>) 2998, 2986, 2361, 2334, 1740, 1548, 1515, 1466, 1397, 1366, 1335, 1268, 1152, 755.

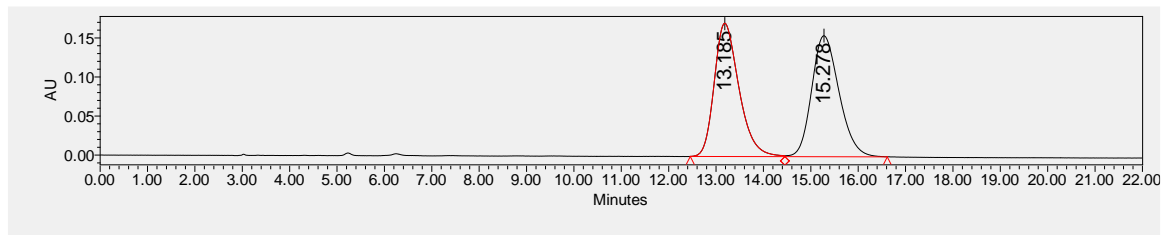

|   | Retention Time | Area    | % Area |
|---|----------------|---------|--------|
| 1 | 13.185         | 6176891 | 49.81  |
| 2 | 15.278         | 6223233 | 50.19  |

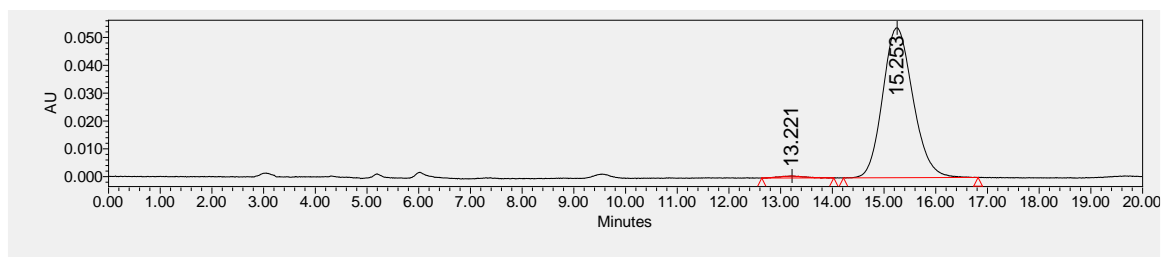

|   | Retention Time | Area    | % Area |
|---|----------------|---------|--------|
| 1 | 13.221         | 31172   | 1.41   |
| 2 | 15.253         | 2173169 | 98.59  |

**Di-*tert*-butyl (1*R*,2*R*,3*S*,4*R*)-4-acetyl-5'-bromo-1,6-dimethyl-2',5-dioxo-7-oxa-6-azaspiro[bicyclo[2.2.1]heptane-2,3'-indoline]-1',3-dicarboxylate**

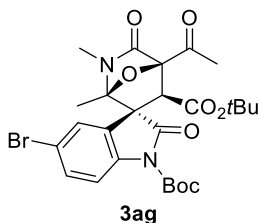

White solid; 71% yield, 96% ee, > 95:5 dr; 41.0 mg;  $[\alpha]_D^{21} = -25.0$  (*c* 0.060, CH<sub>2</sub>Cl<sub>2</sub>); determined by HPLC analysis [Daicel chiralpak IG, *n*-hexane/*i*-PrOH = 80/20, 1.0 mL/min,  $\lambda = 230$  nm,  $t_1 = 13.86$  min,  $t_2 = 15.79$  min].

<sup>1</sup>H NMR (400 MHz, CDCl<sub>3</sub>)  $\delta$  7.76 – 7.72 (m, 1H), 7.53 – 7.48 (m, 2H), 3.80 (s, 1H), 2.87 (s, 3H), 2.45 (s, 3H), 1.62 (s, 9H), 1.33 (s, 3H), 1.01 (s, 9H).

<sup>13</sup>C NMR (101 MHz, CDCl<sub>3</sub>)  $\delta$  198.28, 171.03, 168.49, 166.09, 148.41, 139.27, 132.82, 129.01, 126.93, 118.10, 116.50, 98.33, 91.06, 85.79, 83.69, 77.48, 77.16, 76.84, 63.34, 59.82, 59.81, 28.13, 28.08, 27.70, 27.41, 14.77.

**ESI-HRMS** calcd for [C<sub>26</sub>H<sub>31</sub><sup>78.9183</sup>BrN<sub>2</sub>O<sub>8</sub>+H<sup>+</sup>]: 579.1337, found 579.1338; **ESI-HRMS** calcd for [C<sub>26</sub>H<sub>31</sub><sup>80.9163</sup>BrN<sub>2</sub>O<sub>8</sub>+H<sup>+</sup>]: 581.1316, found 581.1321;

**IR** (film):  $\tilde{\nu}$  (cm<sup>-1</sup>) 2983, 2361, 2334, 1794, 1740, 1467, 1398, 1367, 1334, 1300, 1268, 1153, 1105, 893, 836, 755, 678.

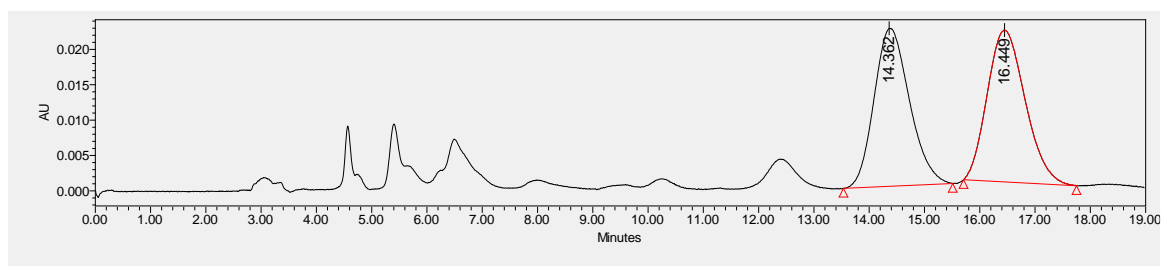

|   | Retention Time | Area    | % Area |
|---|----------------|---------|--------|
| 1 | 14.362         | 992451  | 49.25  |
| 2 | 16.449         | 1022778 | 50.75  |

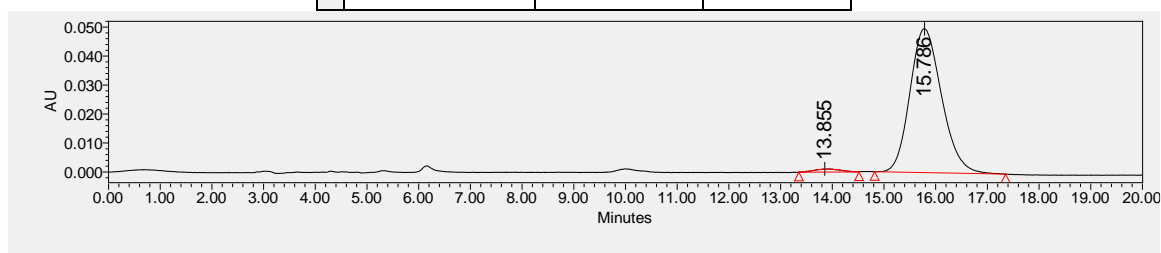

|   | Retention Time | Area    | % Area |
|---|----------------|---------|--------|
| 1 | 13.855         | 37246   | 1.73   |
| 2 | 15.786         | 2112042 | 98.27  |

**Di-*tert*-butyl (1*R*,2*R*,3*S*,4*R*)-4-acetyl-5'-iodo-1,6-dimethyl-2',5-dioxo-7-oxa-6-azaspiro[bicyclo[2.2.1]heptane-2,3'-indoline]-1',3-dicarboxylate**

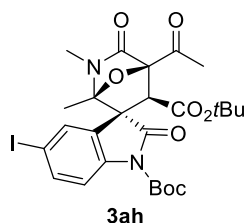

White solid; 64% yield, 97% ee, > 95:5 dr; 39.8 mg;  $[\alpha]_D^{25} = -23.5$  (*c* 0.068, CH<sub>2</sub>Cl<sub>2</sub>); determined by HPLC analysis [Daicel chiralpak IG, *n*-hexane/*i*-PrOH = 80/20, 1.0 mL/min,  $\lambda = 230$  nm,  $t_1 = 15.00$  min,  $t_2 = 16.80$  min].

<sup>1</sup>H NMR (400 MHz, CDCl<sub>3</sub>)  $\delta$  7.74 – 7.67 (m, 2H), 7.62 (d, *J* = 8.6 Hz, 1H), 3.81 (s, 1H), 2.88 (s, 3H), 2.46 (s, 3H), 1.62 (s, 9H), 1.33 (s, 3H), 1.02 (s, 9H).

<sup>13</sup>C NMR (101 MHz, CDCl<sub>3</sub>)  $\delta$  198.23, 170.92, 168.56, 166.11, 148.45, 140.05, 138.87, 134.59, 127.26, 116.87, 98.37, 91.14, 88.50, 85.80, 83.75, 77.48, 77.16, 76.84, 63.24, 28.17, 27.72, 27.51, 14.82.

ESI-HRMS calcd for [C<sub>26</sub>H<sub>31</sub>IN<sub>2</sub>O<sub>8</sub>+H<sup>+</sup>]: 627.1198, found 627.1198;

IR (film):  $\tilde{\nu}$  (cm<sup>-1</sup>) 2999, 2986, 2361, 2334, 1740, 1646, 1563, 1532, 1515, 1465, 1397, 1367, 1331, 1268, 1152, 894, 755, 677.

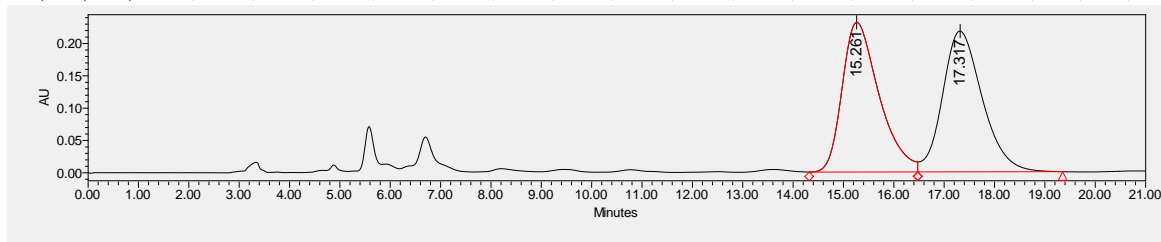

|   | Retention Time | Area     | % Area |
|---|----------------|----------|--------|
| 1 | 15.261         | 11779046 | 49.69  |
| 2 | 17.317         | 11927288 | 50.31  |

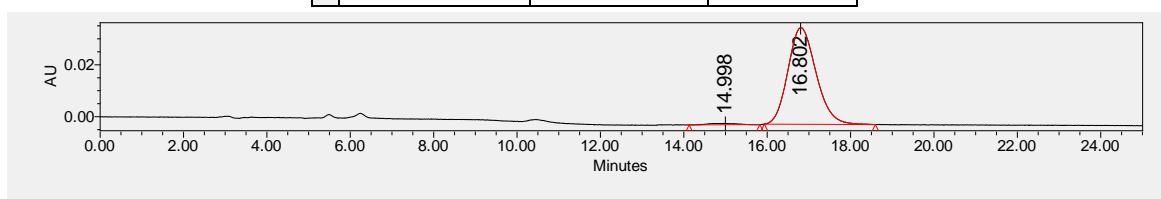

|   | Retention Time | Area    | % Area |
|---|----------------|---------|--------|
| 1 | 14.998         | 24309   | 1.37   |
| 2 | 16.802         | 1744946 | 98.63  |

**Di-tert-butyl (1*R*,2*R*,3*S*,4*R*)-4-acetyl-1,5',6-trimethyl-2',5-dioxo-7-oxa-6-azaspiro[bicyclo[2.2.1]heptane-2,3'-indoline]-1',3-dicarboxylate**

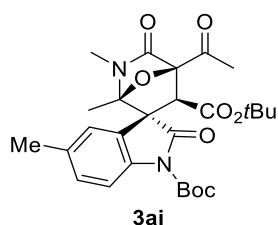

White solid; 91% yield, 98% ee, 96:4 dr; 46.8 mg;  $[\alpha]_D^{21} = -74$  (*c* 0.2, CH<sub>2</sub>Cl<sub>2</sub>); determined by HPLC analysis [Daicel chiralpak IG, *n*-hexane/*i*-PrOH = 80/20, 1.0 mL/min,  $\lambda = 230$  nm,  $t_1 = 9.21$  min,  $t_2 = 11.88$  min,  $t_3 = 19.50$  min,  $t_4 = 24.66$  min].

<sup>1</sup>H NMR (400 MHz, CDCl<sub>3</sub>)  $\delta$  7.68 (d, *J* = 8.3 Hz, 1H), 7.20 – 7.12 (m, 2H), 3.81 (s, 1H), 2.88 (s, 3H), 2.45 (s, 3H), 2.29 (s, 3H), 1.62 (s, 9H), 1.30 (s, 3H), 0.93 (s, 9H).

<sup>13</sup>C NMR (101 MHz, CDCl<sub>3</sub>)  $\delta$  198.39, 172.04, 168.78, 166.37, 148.68, 137.89, 134.74, 130.24, 126.68, 124.77, 114.63, 98.30, 91.00, 85.12, 83.06, 77.48, 77.16, 76.84, 63.49, 59.78, 59.76, 28.16, 28.02, 27.67, 27.29, 21.12, 14.70.

ESI-HRMS calcd for [C<sub>27</sub>H<sub>34</sub>N<sub>2</sub>O<sub>8</sub>+H<sup>+</sup>]: 515.2388, found 515.2394;

IR (film):  $\tilde{\nu}$  (cm<sup>-1</sup>) 2981, 2937, 2361, 2334, 1791, 1739, 1485, 1463, 1393, 1366, 1338, 1308, 1271, 1151, 1109, 1027, 896, 843, 755, 679.

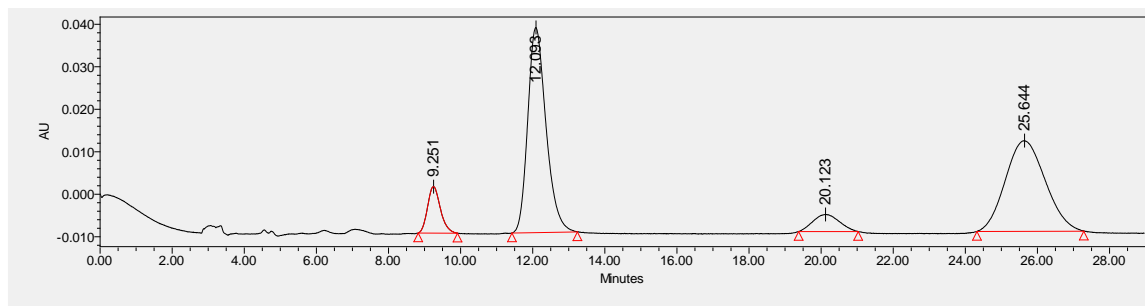

|   | Name | Retention Time | Area    | % Area |
|---|------|----------------|---------|--------|
| 1 |      | 9.251          | 271829  | 7.12   |
| 2 |      | 12.093         | 1699116 | 44.53  |
| 3 |      | 20.123         | 204910  | 5.37   |
| 4 |      | 25.644         | 1639724 | 42.97  |

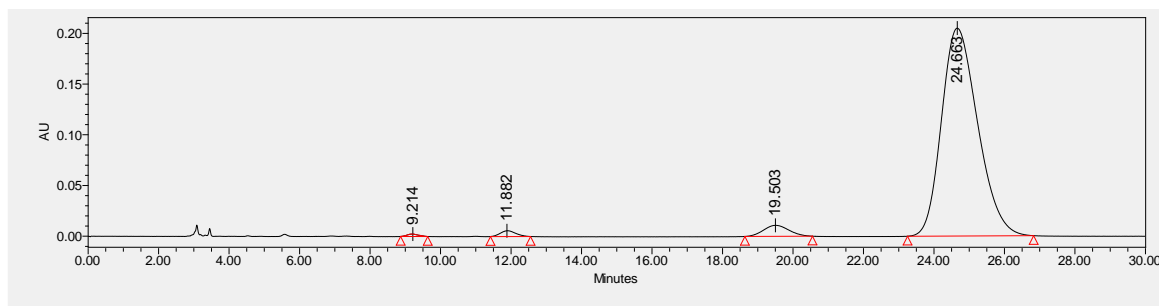

|   | Name | Retention Time | Area     | % Area |
|---|------|----------------|----------|--------|
| 1 |      | 9.214          | 54089    | 0.35   |
| 2 |      | 11.882         | 175134   | 1.14   |
| 3 |      | 19.503         | 543245   | 3.53   |
| 4 |      | 24.663         | 14596729 | 94.97  |

**Di-tert-butyl (1*R*,2*R*,3*S*,4*R*)-4-acetyl-5'-methoxy-1,6-dimethyl-2',5-dioxo-7-oxa-6-azaspiro[bicyclo[2.2.1]heptane-2,3'-indoline]-1',3-dicarboxylate**

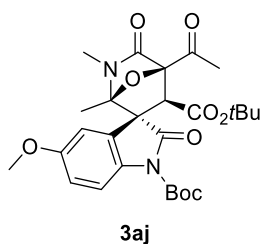

White solid; 82% yield, 97% ee, >95:5 dr; 43.5 mg;  $[\alpha]_D^{21} = -93.5$  (*c* 0.20, CH<sub>2</sub>Cl<sub>2</sub>); determined by HPLC analysis [Daicel chiralpak IG, *n*-hexane/*i*-PrOH = 70/30, 1.0 mL/min,  $\lambda = 230$  nm,  $t_1 = 8.85$  min,  $t_2 = 22.17$  min].

**<sup>1</sup>H NMR** (400 MHz, CDCl<sub>3</sub>)  $\delta$  7.73 (d, *J* = 8.9 Hz, 1H), 6.96 (d, *J* = 2.7 Hz, 1H), 6.91 – 6.85 (m, 1H), 3.81 (s, 1H), 3.76 (s, 3H), 2.88 (s, 3H), 2.44 (s, 3H), 1.62 (s, 9H), 1.32 (s, 3H), 0.96 (s, 9H).

**<sup>13</sup>C NMR** (101 MHz, CDCl<sub>3</sub>)  $\delta$  198.44, 171.93, 168.70, 166.39, 157.10, 148.70, 133.57, 125.95, 115.82, 115.18, 112.12, 98.29, 90.91, 85.10, 83.08, 77.48, 77.16, 76.84, 63.69, 59.90, 59.89, 55.88, 55.86, 28.18, 28.03, 27.68, 27.39, 14.70.

**ESI-HRMS** calcd for [C<sub>27</sub>H<sub>34</sub>N<sub>2</sub>O<sub>9</sub>+H<sup>+</sup>]: 531.2337, found 531.2338;

**IR** (film):  $\tilde{\nu}$  (cm<sup>-1</sup>) 3004, 2982, 2939, 2360, 2341, 1798, 1770, 1738, 1623, 1497, 1448, 1398, 1372, 1276, 1260, 1152, 1109, 853, 800, 764, 750, 683.

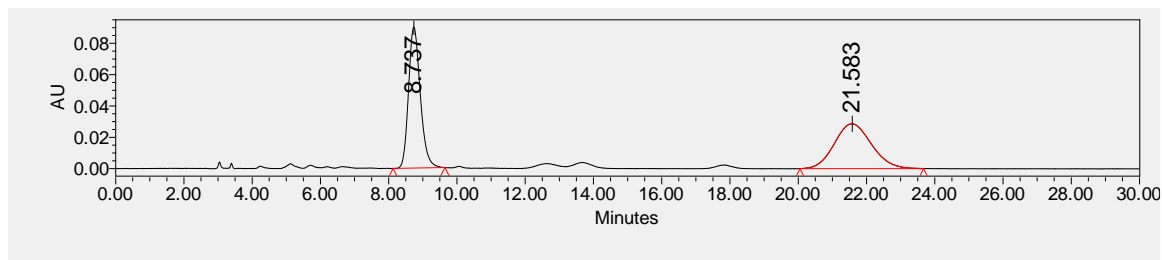

|   | Retention Time | Area    | % Area |
|---|----------------|---------|--------|
| 1 | 8.737          | 2155468 | 49.90  |
| 2 | 21.583         | 2163731 | 50.10  |

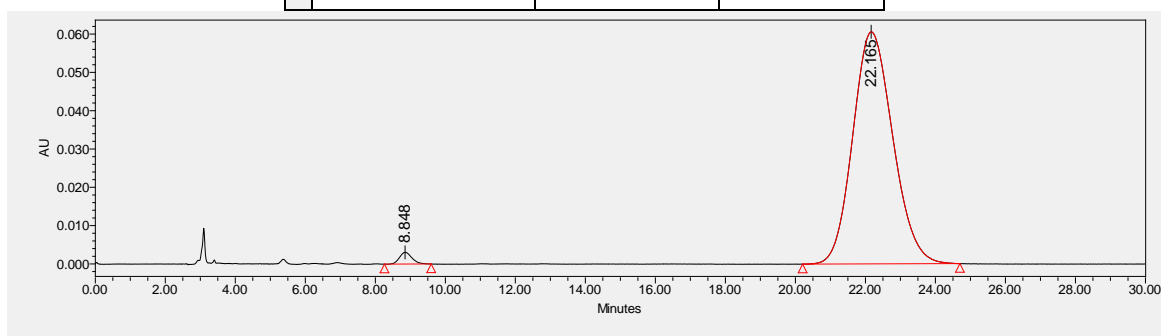

|   | Name | Retention Time | Area    | % Area |
|---|------|----------------|---------|--------|
| 1 |      | 8.848          | 75191   | 1.54   |
| 2 |      | 22.165         | 4812168 | 98.46  |

**Di-tert-butyl (1*R*,2*R*,3*S*,4*R*)-4-acetyl-5',6'-difluoro-1,6-dimethyl-2',5-dioxo-7-oxa-6-azaspiro[bicyclo[2.2.1]heptane-2,3'-indoline]-1',3-dicarboxylate**

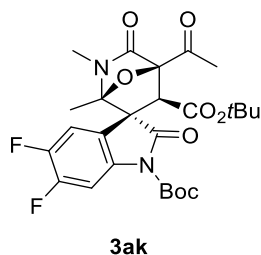

White solid; 70% yield, 95% ee, > 95:5 dr; 37.4 mg;  $[\alpha]_D^{21} = -67.0$  (*c* 0.20, CH<sub>2</sub>Cl<sub>2</sub>); determined by HPLC analysis [Daicel chiralpak IG, *n*-hexane/*i*-PrOH = 80/20, 1.0 mL/min,  $\lambda = 230$  nm,  $t_1 = 10.34$  min,  $t_2 = 12.48$  min].

**<sup>1</sup>H NMR** (600 MHz, CDCl<sub>3</sub>)  $\delta$  7.82 (dd, *J* = 11.1, 6.9 Hz, 1H), 7.29 (dd, *J* = 9.4, 8.0 Hz, 1H), 3.81 (s, 1H), 2.90 (s, 3H), 2.46 (s, 3H), 1.64 (s, 9H), 1.33 (s, 3H), 1.04 (s, 9H).

**<sup>13</sup>C NMR** (151 MHz, CDCl<sub>3</sub>)  $\delta$  198.28, 171.04, 168.44, 166.23, 151.85 (d, *J* = 6.80 Hz), 150.20 (d, *J* = 6.80 Hz), 148.61 (d, *J* = 6.80 Hz), 148.35, 146.98 (d, *J* = 6.80 Hz), 136.45 (dd, *J* = 6.80 Hz, *J* = 1.51 Hz), 120.60 (dd, *J* = 6.80 Hz, *J* = 1.51 Hz), 115.71 (d, *J* = 10.57 Hz), 105.69 (d, *J* = 12.84 Hz), 98.28, 91.04, 86.16, 83.68, 77.40, 77.19, 76.98, 63.30, 59.89, 28.16, 28.05, 27.73, 27.53,

14.74.

**<sup>19</sup>F{<sup>1</sup>H} NMR** (565 MHz, CDCl<sub>3</sub>)  $\delta$  -132.97, -141.12.

**ESI-HRMS** calcd for [C<sub>26</sub>H<sub>30</sub>F<sub>2</sub>N<sub>2</sub>O<sub>8</sub>+H<sup>+</sup>]: 537.2043, found 537.2040;

**IR** (film):  $\tilde{\nu}$  (cm<sup>-1</sup>) 2989, 2362, 2334, 1792, 1740, 1646, 1547, 1515, 1484, 1464, 1426, 1397, 1365, 1268, 1154, 755, 677.

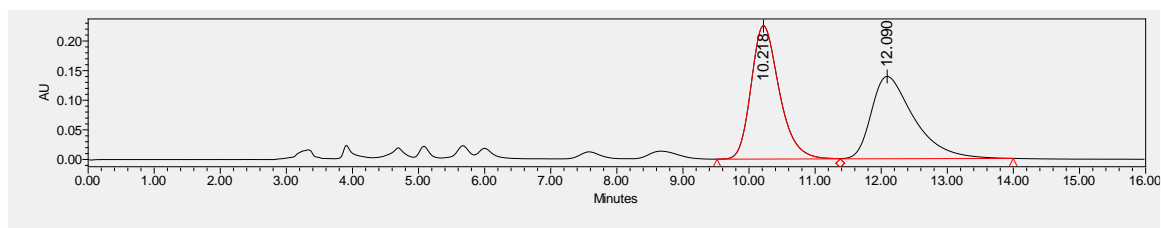

|   | Name | Retention Time | Area    | % Area |
|---|------|----------------|---------|--------|
| 1 |      | 10.218         | 6663254 | 51.67  |
| 2 |      | 12.090         | 6232217 | 48.33  |

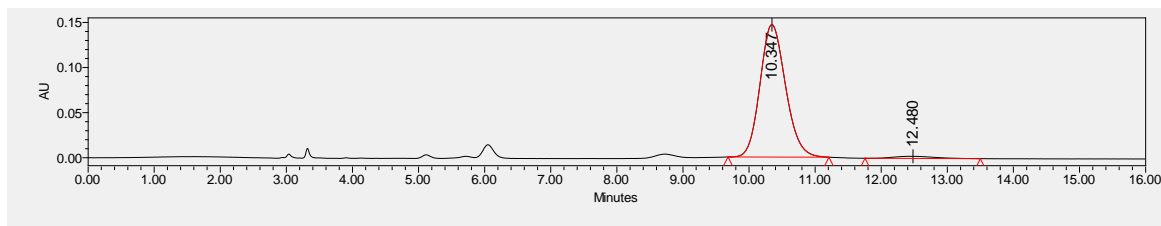

|   | Name | Retention Time | Area    | % Area |
|---|------|----------------|---------|--------|
| 1 |      | 10.347         | 3944806 | 97.51  |
| 2 |      | 12.480         | 100766  | 2.49   |

**Di-tert-butyl (1R,2R,3S,4R)-4-acetyl-6'-methoxy-1,6-dimethyl-2',5-dioxo-7-oxa-6-azaspiro [bicyclo[2.2.1]heptane-2,3'-indoline]-1',3-dicarboxylate**

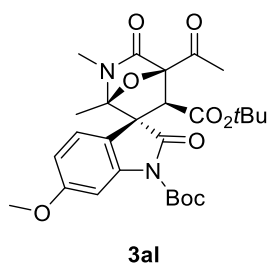

White solid; 82% yield, 96% ee, > 95:5 dr; 44.1 mg;  $[\alpha]_D^{25} = -119.4$  ( $c$  0.072,  $\text{CH}_2\text{Cl}_2$ ); determined by HPLC analysis [Daicel chiralpak IG,  $n$ -hexane/ $i$ -PrOH = 80/20, 1.0 mL/min,  $\lambda = 230$  nm,  $t_1 = 8.76$  min,  $t_2 = 10.48$  min,  $t_3 = 12.70$  min,  $t_4 = 15.20$  min].

**$^1\text{H}$  NMR** (400 MHz,  $\text{CDCl}_3$ )  $\delta$  7.43 (d,  $J = 2.4$  Hz, 1H), 7.28 (d,  $J = 8.5$  Hz, 1H), 6.67 (dd,  $J = 8.5, 2.4$  Hz, 1H), 3.81 (s, 3H), 3.79 (s, 1H), 2.88 (s, 3H), 2.44 (s, 3H), 1.63 (s, 9H), 1.29 (s, 3H), 0.96 (s, 9H).

**$^{13}\text{C}$  NMR** (101 MHz,  $\text{CDCl}_3$ )  $\delta$  198.70, 172.38, 168.77, 166.49, 161.11, 148.58, 141.37, 127.23, 116.43, 110.10, 101.76, 98.30, 90.85, 85.33, 83.01, 77.48, 77.16, 76.84, 63.11, 59.87, 55.75, 28.15, 28.00, 27.64, 27.47, 14.64.

**ESI-HRMS** calcd for  $[\text{C}_{27}\text{H}_{34}\text{N}_2\text{O}_9 + \text{H}^+]$ : 531.2337, found 531.2338;

**IR** (film):  $\tilde{\nu}$  ( $\text{cm}^{-1}$ ) 3005, 2988, 2361, 2337, 1753, 1737, 1501, 1478, 1467, 1450, 1400, 1368, 1358, 1275, 1260, 1152, 1103, 1023, 845, 764, 750.

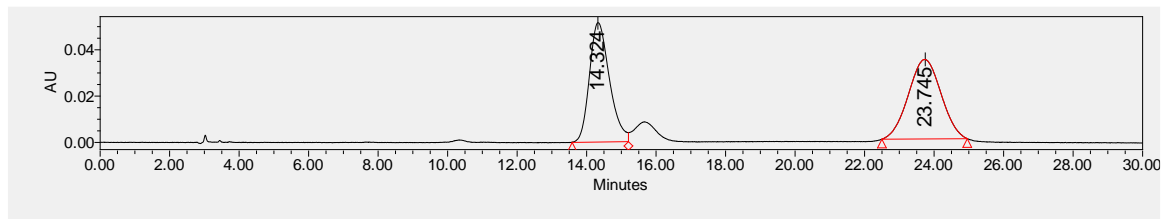

|   | Retention Time | Area    | % Area |
|---|----------------|---------|--------|
| 1 | 14.324         | 2067296 | 47.97  |
| 2 | 23.745         | 2242484 | 52.03  |

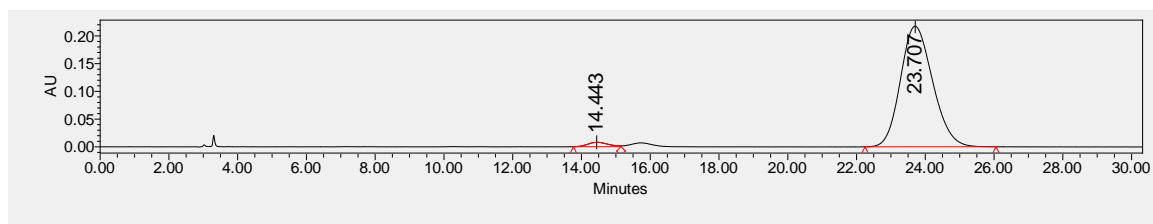

|   | Retention Time | Area     | % Area |
|---|----------------|----------|--------|
| 1 | 14.443         | 328077   | 2.27   |
| 2 | 23.707         | 14141297 | 97.73  |

**Di-tert-butyl (1*R*,2*R*,3*S*,4*R*)-4-acetyl-6'-fluoro-1,6-dimethyl-2',5-dioxo-7-oxa-6-azaspiro[bicyclo[2.2.1]heptane-2,3'-indoline]-1',3-dicarboxylate**

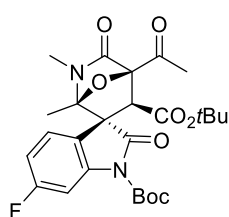

**3am**

White solid; 86% yield, 96% ee, 97:3 dr; 44.5 mg;  $[\alpha]_D^{25} = -95.5$  (*c* 0.20, CH<sub>2</sub>Cl<sub>2</sub>); determined by HPLC analysis [Daicel chiralpak IG, *n*-hexane/*i*-PrOH = 80/20, 1.0 mL/min,  $\lambda = 230$  nm,  $t_1 = 9.11$  min,  $t_2 = 11.05$  min,  $t_3 = 12.49$  min,  $t_4 = 13.68$  min].

<sup>1</sup>H NMR (400 MHz, CDCl<sub>3</sub>)  $\delta$  7.63 (dd, *J* = 9.9, 2.3 Hz, 1H), 7.38 (dd, *J* = 8.5, 5.7 Hz, 1H), 6.87 (td, *J* = 8.7, 2.3 Hz, 1H), 3.80 (s, 1H), 2.89 (s, 3H), 2.44 (s, 3H), 1.63 (s, 10H), 1.30 (s, 3H), 0.97 (s, 9H).

<sup>13</sup>C NMR (101 MHz, CDCl<sub>3</sub>)  $\delta$  198.23, 171.58, 168.48, 166.21, 164.69, 162.23, 148.24, 141.47 (*J* = 12.1 Hz), 127.67 (*J* = 10.1 Hz), 120.20 (*J* = 3.0 Hz), 111.56 (*J* = 23.2 Hz), 103.75 (*J* = 29.3 Hz), 98.11,

90.78, 85.76, 83.17, 77.35, 77.04, 76.72, 63.02, 59.83, 28.00, 27.86, 27.54, 27.35, 14.55.

<sup>19</sup>F{<sup>1</sup>H} NMR (376 MHz, CDCl<sub>3</sub>)  $\delta$  -108.56.

ESI-HRMS calcd for [C<sub>26</sub>H<sub>31</sub>FN<sub>2</sub>O<sub>8</sub>+H<sup>+</sup>]: 519.2137, found 519.2142;

IR (film):  $\tilde{\nu}$  (cm<sup>-1</sup>): 3006, 295, 2361, 2334, 1794, 1740, 1548, 1515, 465, 1397, 1365, 1268, 1153, 1094, 899, 858, 755, 679.

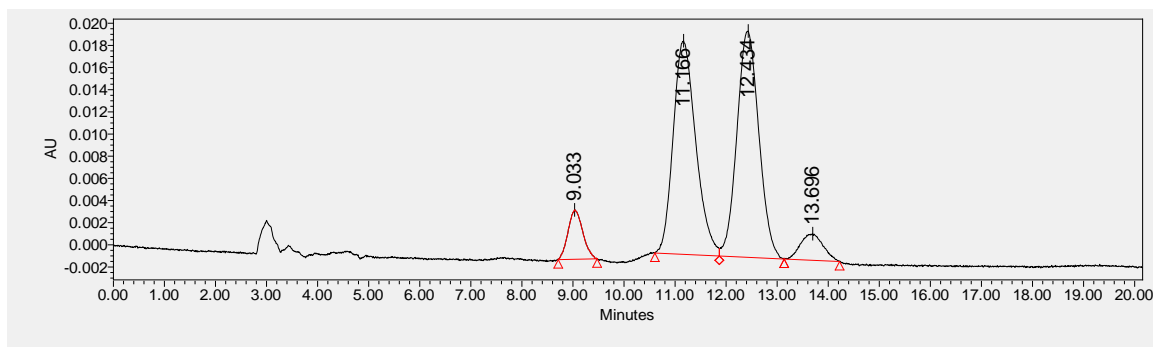

|   | Retention Time | Area   | % Area |
|---|----------------|--------|--------|
| 1 | 9.033          | 89066  | 6.53   |
| 2 | 11.166         | 591102 | 43.34  |
| 3 | 12.434         | 610242 | 44.75  |
| 4 | 13.696         | 73397  | 5.38   |



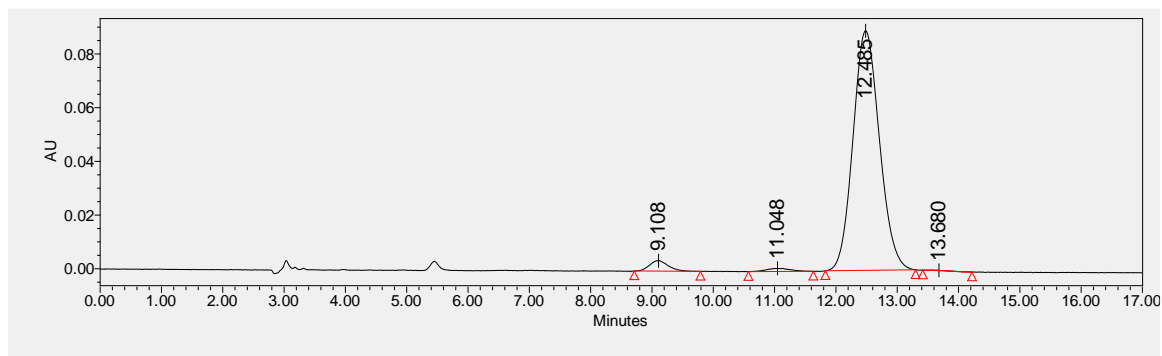

|   | Retention Time | Area    | % Area |
|---|----------------|---------|--------|
| 1 | 9.108          | 82861   | 2.97   |
| 2 | 11.048         | 31140   | 1.12   |
| 3 | 12.485         | 2671718 | 95.80  |
| 4 | 13.680         | 3269    | 0.12   |

**Di-*tert*-butyl (1*R*,2*R*,3*S*,4*R*)-4-acetyl-6'-chloro-1,6-dimethyl-2',5-dioxo-7-oxa-6-azaspiro[bicyclo[2.2.1]heptane-2,3'-indoline]-1',3-dicarboxylate**

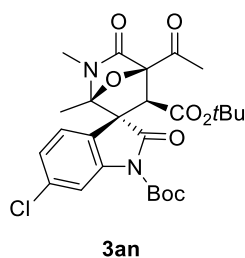

White solid; 81% yield, 98% ee, 98:2 dr; 43.3 mg;  $[\alpha]_D^{25} = -87.9$  (*c* 0.14, CH<sub>2</sub>Cl<sub>2</sub>); determined by HPLC analysis [Daicel chiralpak IG, *n*-hexane/*i*-PrOH = 80/20, 1.0 mL/min,  $\lambda = 230$  nm,  $t_1 = 8.51$  min,  $t_2 = 10.17$  min,  $t_3 = 11.83$  min,  $t_4 = 15.17$  min].

<sup>1</sup>H NMR (400 MHz, CDCl<sub>3</sub>)  $\delta$  7.92 (d, *J* = 1.7 Hz, 1H), 7.34 (d, *J* = 8.2 Hz, 1H), 7.15 (dd, *J* = 8.2, 1.8 Hz, 1H), 3.81 (s, 1H), 2.89 (s, 3H), 2.44 (s, 3H), 1.63 (s, 9H), 1.31 (s, 3H), 0.97 (s, 9H).

<sup>13</sup>C NMR (101 MHz, CDCl<sub>3</sub>)  $\delta$  198.28, 171.41, 168.59, 166.27, 148.39, 141.24, 135.94, 127.37, 124.93, 123.23, 115.62, 98.23, 90.93, 85.93, 83.43, 77.48, 77.16, 76.84, 63.24, 59.96, 28.13, 28.00, 27.69, 27.46, 14.72.

**ESI-HRMS** calcd for [C<sub>26</sub>H<sub>31</sub><sup>34,9689</sup>CIN<sub>2</sub>O<sub>8</sub>+Na<sup>+</sup>]: 535.1842, found 535.1836; **ESI-HRMS** calcd for [C<sub>26</sub>H<sub>31</sub><sup>36,9659</sup>CIN<sub>2</sub>O<sub>8</sub>+Na<sup>+</sup>]: 537.1812, found 537.1821.

**IR** (film):  $\tilde{\nu}$  (cm<sup>-1</sup>) 3004, 2985, 2360, 2341, 1799, 1738, 1604, 1558, 1541, 1473, 1457, 1424, 1398, 1370, 1339, 1275, 1260, 1152, 1105, 1081, 1024, 841, 764, 750.

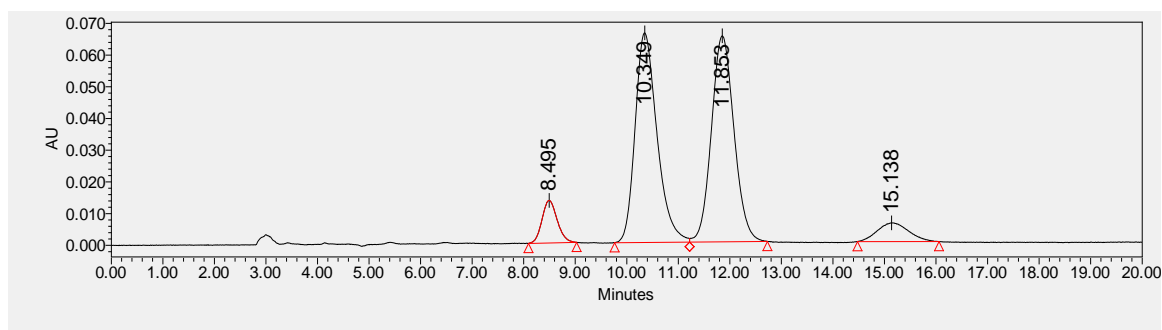

|   | Retention Time | Area    | % Area |
|---|----------------|---------|--------|
| 1 | 8.495          | 274521  | 6.17   |
| 2 | 10.349         | 1951194 | 43.82  |
| 3 | 11.853         | 1976441 | 44.39  |
| 4 | 15.138         | 250105  | 5.62   |

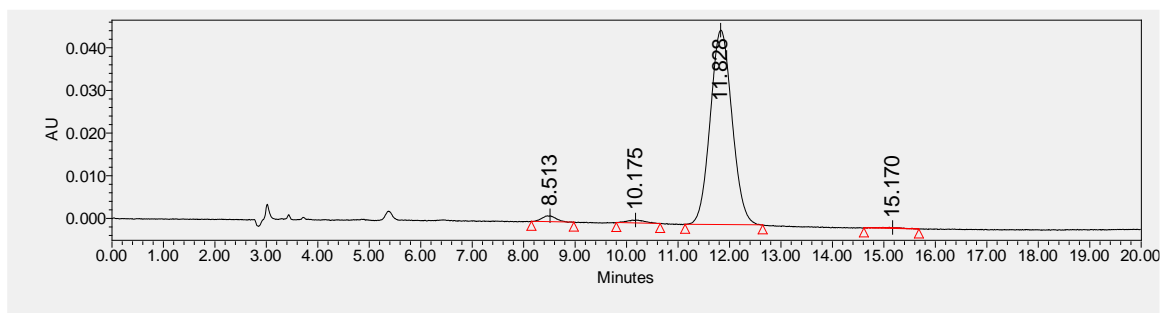

|   | Retention Time | Area    | % Area |
|---|----------------|---------|--------|
| 1 | 8.513          | 25530   | 1.84   |
| 2 | 10.175         | 15825   | 1.14   |
| 3 | 11.828         | 1336536 | 96.56  |
| 4 | 15.170         | 6192    | 0.45   |

**Di-*tert*-butyl (1*R*,2*R*,3*S*,4*R*)-4-acetyl-6'-bromo-1,6-dimethyl-2',5-dioxo-7-oxa-6-azaspiro[bicyclo[2.2.1]heptane-2,3'-indoline]-1',3-dicarboxylate**

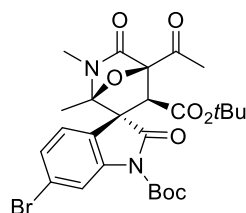

**3ao**

White solid; 81% yield, 97% ee, 98:2 dr; 47.0 mg;  $[\alpha]_D^{23} = -85.7$  (*c* 0.056, CH<sub>2</sub>Cl<sub>2</sub>); determined by HPLC analysis [Daicel chiralpak IG, *n*-hexane/*i*-PrOH = 80/20, 1.0 mL/min,  $\lambda = 230$  nm,  $t_1 = 8.76$  min,  $t_2 = 10.48$  min,  $t_3 = 12.70$  min,  $t_4 = 15.20$  min].

<sup>1</sup>H NMR (400 MHz, CDCl<sub>3</sub>)  $\delta$  8.09 – 8.06 (m, 1H), 7.34 – 7.27 (m, 2H), 3.81 (s, 1H), 2.89 (s, 3H), 2.45 (s, 3H), 1.63 (s, 9H), 1.31 (s, 3H), 0.98 (s, 9H).

<sup>13</sup>C NMR (101 MHz, CDCl<sub>3</sub>)  $\delta$  198.26, 171.30, 168.59, 166.25, 148.40, 141.36, 127.89, 127.67, 123.81, 123.78, 118.40, 100.12, 98.16, 90.93, 85.95, 83.46, 77.48, 77.36, 77.16, 76.84, 63.31, 59.93, 28.13, 28.01, 27.69, 27.46, 14.74.

**ESI-HRMS** calcd for [C<sub>26</sub>H<sub>31</sub><sup>78,9183</sup>BrN<sub>2</sub>O<sub>8</sub>+H<sup>+</sup>]: 579.1337, found 579.1333; **ESI-HRMS** calcd for [C<sub>26</sub>H<sub>31</sub><sup>80,9163</sup>BrN<sub>2</sub>O<sub>8</sub>+H<sup>+</sup>]: 581.1316, found 581.1316;

**IR** (film):  $\tilde{\nu}$  (cm<sup>-1</sup>) 3006, 2989, 2359, 2341, 1771, 1748, 1734, 1716, 1698, 1558, 1541, 1534, 1507, 1473, 1457, 1396, 1275, 1260, 1153, 750, 699.

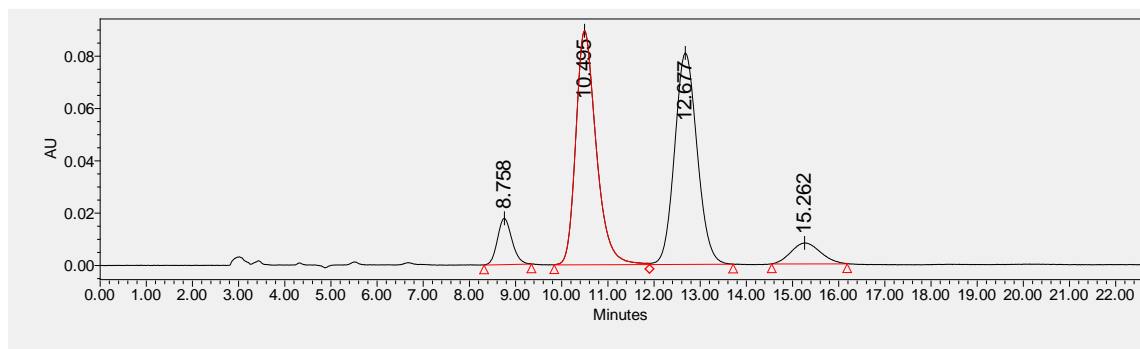

|   | Retention Time | Area    | % Area |
|---|----------------|---------|--------|
| 1 | 8.758          | 385553  | 6.21   |
| 2 | 10.495         | 2735990 | 44.05  |
| 3 | 12.677         | 2732491 | 44.00  |
| 4 | 15.262         | 356389  | 5.74   |

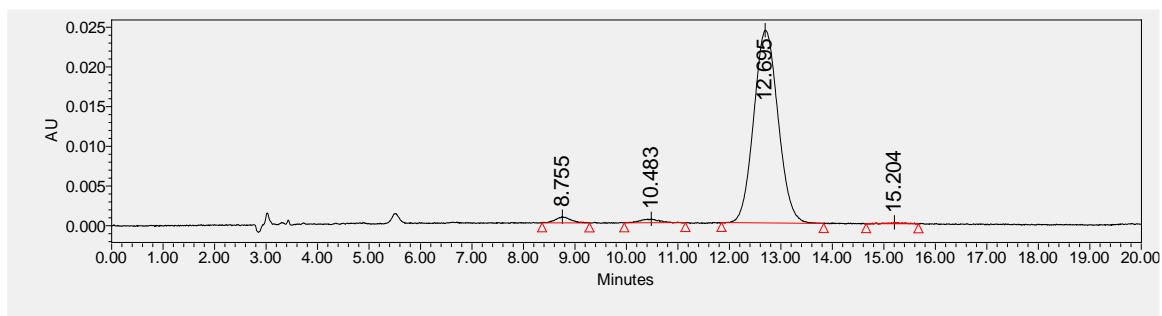

|   | Retention Time | Area   | % Area |
|---|----------------|--------|--------|
| 1 | 8.755          | 15394  | 1.86   |
| 2 | 10.483         | 12040  | 1.46   |
| 3 | 12.695         | 795606 | 96.28  |
| 4 | 15.204         | 3333   | 0.40   |

**Di-*tert*-butyl (1*R*,2*R*,3*S*,4*R*)-4-acetyl-1,5',6,7'-tetramethyl-2',5-dioxo-7-oxa-6-azaspiro[bicyclo[2.2.1]heptane-2,3'-indoline]-1',3-dicarboxylate**

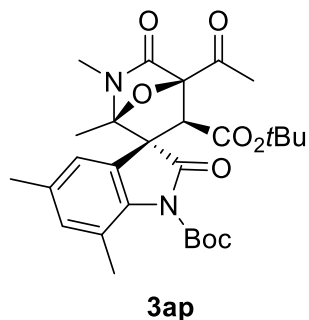

White solid; 68% yield, 60% ee, > 95:5 dr; 35.9 mg;  $[\alpha]_D^{25} = -76.0$  (*c* 0.20, CH<sub>2</sub>Cl<sub>2</sub>); determined by HPLC analysis [Daicel chiralpak IG, *n*-hexane/*i*-PrOH = 80/20, 1.0 mL/min,  $\lambda = 254$  nm,  $t_1 = 11.07$  min,  $t_2 = 13.97$  min].

<sup>1</sup>H NMR (400 MHz, CDCl<sub>3</sub>)  $\delta$  7.02 (s, 1H), 6.97 (s, 1H), 3.82 (s, 1H), 2.87 (s, 3H), 2.46 (s, 3H), 2.26 (s, 3H), 2.21 (s, 3H), 1.60 (s, 9H), 1.26 (s, 3H), 0.95 (s, 9H).

<sup>13</sup>C NMR (101 MHz, CDCl<sub>3</sub>)  $\delta$  198.50, 173.07, 168.84, 166.53, 148.87, 136.65, 134.51, 133.09, 126.11, 124.35, 123.26, 98.27, 90.98, 85.44, 83.04, 77.48, 77.16, 76.84, 63.93, 59.79, 28.00, 27.85, 27.58, 27.36, 21.01, 19.39, 14.59.

ESI-HRMS calcd for [C<sub>28</sub>H<sub>36</sub>N<sub>2</sub>O<sub>8</sub>+H<sup>+</sup>]: 529.2544, found 529.2546;

IR (film):  $\tilde{\nu}$  (cm<sup>-1</sup>) 2981, 2933, 2361, 2334, 1744, 1477, 1399, 1366, 1267, 1149, 1081, 1029, 892, 848, 755, 690.

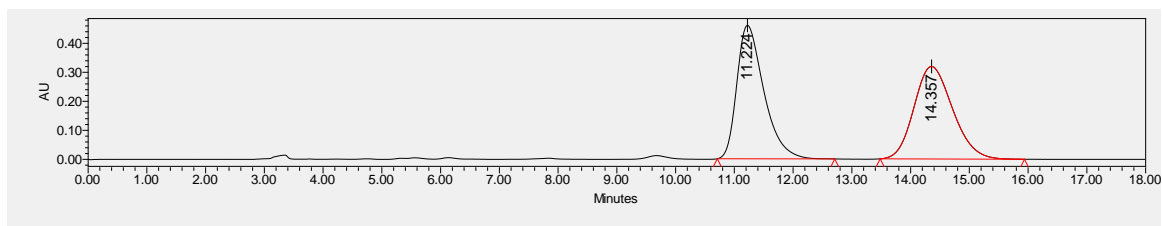

|   | Name | Retention Time | Area     | % Area |
|---|------|----------------|----------|--------|
| 1 |      | 11.224         | 14666630 | 50.23  |
| 2 |      | 14.357         | 14530872 | 49.77  |

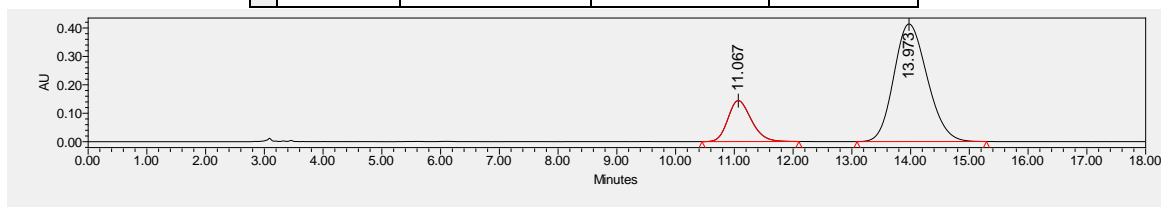

|   | Name | Retention Time | Area     | % Area |
|---|------|----------------|----------|--------|
| 1 |      | 11.067         | 3995555  | 19.65  |
| 2 |      | 13.973         | 16341756 | 80.35  |

**Di-tert-butyl (1R,2R,3S,4R)-4-acetyl-7'-chloro-1,6-dimethyl-2',5-dioxo-7-oxa-6-azaspiro[bicyclo[2.2.1]heptane-2,3'-indoline]-1',3-dicarboxylate**

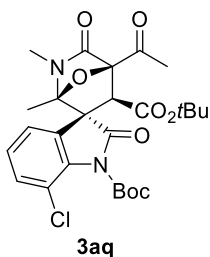

White solid; 77% yield, 58% ee, > 95:5 dr; 41.2 mg;  $[\alpha]_D^{22} = -93.5$  (*c* 0.2, CH<sub>2</sub>Cl<sub>2</sub>); determined by HPLC analysis [Daicel chiralpak IF, *n*-hexane/*i*-PrOH = 90/10, 0.5 mL/min,  $\lambda = 230$  nm,  $t_1 = 37.07$  min,  $t_2 = 39.08$  min].

<sup>1</sup>H NMR (400 MHz, CDCl<sub>3</sub>)  $\delta$  7.34 (dd, *J* = 17.8, 7.9 Hz, 2H), 7.10 (t, *J* = 7.9 Hz, 1H), 3.85 (s, 1H), 2.88 (s, 3H), 2.44 (s, 3H), 1.60 (s, 9H), 1.28 (s, 3H), 0.97 (s, 9H).

<sup>13</sup>C NMR (101 MHz, CDCl<sub>3</sub>)  $\delta$  198.29, 172.14, 168.55, 166.33, 147.46, 137.79, 131.41, 128.25, 125.47, 125.02, 118.67, 98.21, 90.82, 86.46, 83.38, 77.48, 77.16, 76.84, 64.08, 59.92, 27.97, 27.71, 27.61, 27.49, 14.59.

**ESI-HRMS** calcd for [C<sub>26</sub>H<sub>31</sub><sup>34,9689</sup>ClN<sub>2</sub>O<sub>8</sub>+Na<sup>+</sup>]: 557.1661, found 557.1663; **ESI-HRMS** calcd for [C<sub>26</sub>H<sub>31</sub><sup>36,9659</sup>ClN<sub>2</sub>O<sub>8</sub>+Na<sup>+</sup>]: 559.1632, found 559.1640.

**IR** (film):  $\tilde{\nu}$  (cm<sup>-1</sup>): 3004, 2983, 2360, 2341, 1752, 1740, 1718, 1466, 1457, 1422, 1398, 1371, 1275, 1260, 1233, 1151, 1119, 841, 764, 750.

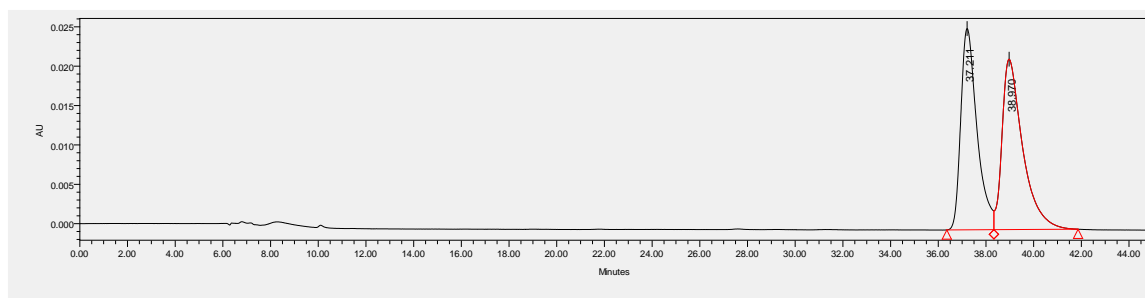

|   | Retention Time | Area    | % Area |
|---|----------------|---------|--------|
| 1 | 37.211         | 1202705 | 48.06  |
| 2 | 38.970         | 1299635 | 51.94  |

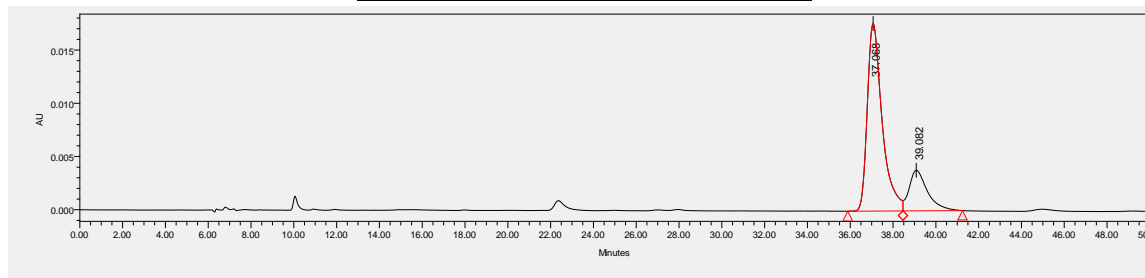

|   | Retention Time | Area   | % Area |
|---|----------------|--------|--------|
| 1 | 37.068         | 848055 | 78.86  |
| 2 | 39.082         | 227379 | 21.14  |

**Di-tert-butyl (3R,6'R,7'S,8a'R)-6'-acetyl-2,5'-dioxo-2',3',6',7'-tetrahydro-1'H,5'H-spiro[indoline-3,8'-[6,8a]epoxyindolizine]-1,7'-dicarboxylate**

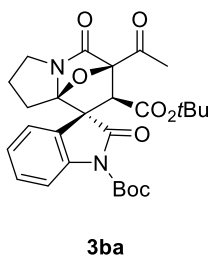

White solid; 85% yield, 99% ee, 97:3 dr; 43.5 mg;  $[\alpha]_D^{20} = -136.7$  (*c* 0.20, CH<sub>2</sub>Cl<sub>2</sub>); determined by HPLC analysis [Daicel chiralpak IF, *n*-hexane/*i*-PrOH = 85/15, 1.0 mL/min,  $\lambda = 230$  nm,  $t_1 = 10.53$  min,  $t_2 = 14.40$  min,  $t_3 = 15.83$  min,  $t_4 = 16.95$  min].

<sup>1</sup>H NMR (400 MHz, CDCl<sub>3</sub>)  $\delta$  7.84 (d, *J* = 8.2 Hz, 1H), 7.47 (d, *J* = 7.0 Hz, 1H), 7.42 – 7.34 (m, 1H), 7.14 (t, *J* = 7.6 Hz, 1H), 4.04 (s, 1H), 3.77 (ddd, *J* = 11.0, 7.8, 2.7 Hz, 1H), 3.15 (ddd, *J* = 11.5, 8.8, 6.7 Hz, 1H), 2.44 (s, 3H), 2.15 – 1.86 (m, 3H), 1.64 (s, 9H), 1.47 – 1.31 (m, 1H), 0.91 (s, 9H).

<sup>13</sup>C NMR (101 MHz, CDCl<sub>3</sub>)  $\delta$  198.61, 171.29, 169.08, 166.37, 148.78, 140.40, 129.95, 126.24, 125.01, 114.73, 105.56, 93.22, 85.27, 83.09, 77.48, 77.16, 76.84, 60.63, 60.12, 43.38, 28.17, 27.94, 27.33, 26.80, 25.65.

**ESI-HRMS** calcd for  $[C_{27}H_{32}N_2O_8+H^+]$ : 513.2231, found 513.2227.

**IR** (film):  $\tilde{\nu}$  ( $cm^{-1}$ ): 2994, 2361, 2334, 1740, 1548, 1515, 1465, 1394, 1364, 1351, 1268, 1154, 755.

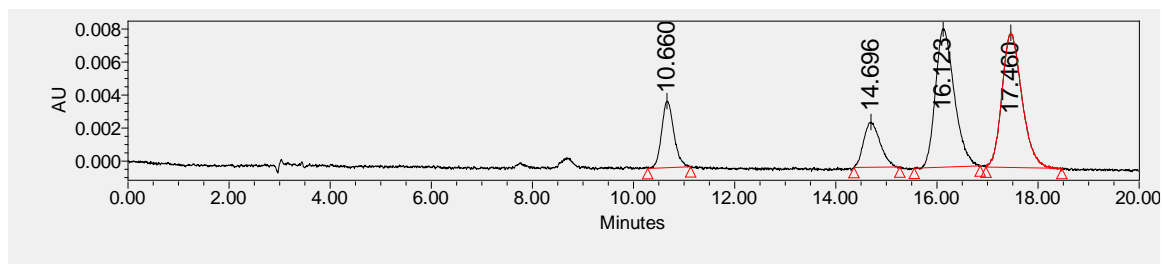

|   | Retention Time | Area   | % Area |
|---|----------------|--------|--------|
| 1 | 10.660         | 67885  | 11.92  |
| 2 | 14.696         | 61669  | 10.83  |
| 3 | 16.123         | 217089 | 38.13  |
| 4 | 17.460         | 222756 | 39.12  |

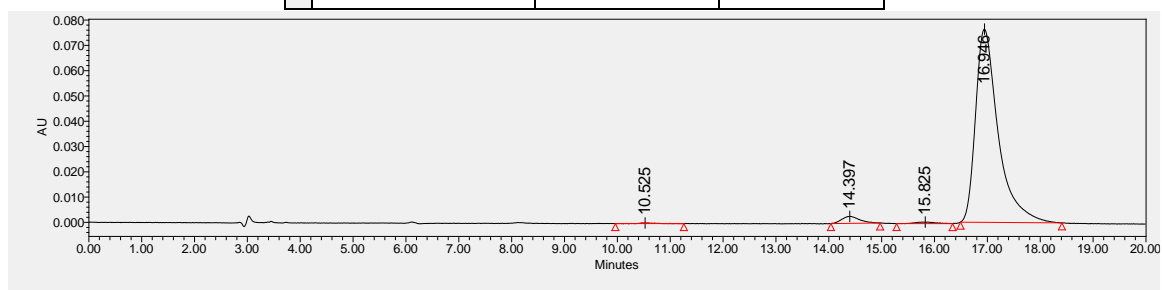

|   | Retention Time | Area    | % Area |
|---|----------------|---------|--------|
| 1 | 10.525         | 4513    | 0.19   |
| 2 | 14.397         | 64220   | 2.73   |
| 3 | 15.825         | 15710   | 0.67   |
| 4 | 16.946         | 2271047 | 96.42  |

### Di-*tert*-butyl

### (2'*S*,3*R*,3'*R*,9*a*'*R*)-3'-acetyl-2,4'-dioxo-3',4',6',7',8',9'-hexahydro-2'*H*-spiro[indoline-3,1'-[3,9a]epoxyquinolizine]-1,2'-dicarboxylate

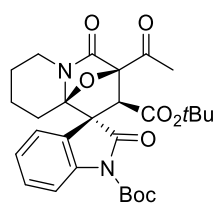

**3ca**

White solid; 95% yield, 95% ee, > 95:5 dr; 46.8 mg;  $[\alpha]_D^{20} = -139.0$  (*c* 0.20,  $CH_2Cl_2$ ); determined by HPLC analysis [Daicel chiralpak IG, *n*-hexane/*i*-PrOH = 70/30, 1.0 mL/min,  $\lambda = 230$  nm,  $t_1 = 10.17$  min,  $t_2 = 17.37$  min].

**$^1H$  NMR** (400 MHz,  $CDCl_3$ )  $\delta$  7.80 (d,  $J = 8.0$  Hz, 1H), 7.40 – 7.32 (m, 2H), 7.14 (td,  $J = 7.7, 1.0$  Hz, 1H), 3.88 (s, 2H), 3.29 (td,  $J = 13.3, 12.8, 4.6$  Hz, 1H), 2.45 (s, 3H), 1.73 (td,  $J = 12.4, 11.3, 5.7$  Hz, 3H), 1.62 (s, 9H), 1.59 – 1.43 (m, 2H), 1.12 – 1.02 (m, 1H), 0.91 (s, 9H).

**$^{13}C$  NMR** (101 MHz,  $CDCl_3$ )  $\delta$  198.60, 172.62, 168.32, 166.40, 148.61, 140.28, 129.83, 126.55, 125.11, 124.96, 114.73, 96.84, 90.42, 85.28, 83.04, 77.48, 77.16, 76.84, 62.87, 60.39, 40.96, 28.16, 28.07, 27.35, 26.81, 22.81, 20.20.

**ESI-HRMS** calcd for  $[C_{28}H_{34}N_2O_8+H^+]$ : 527.2388, found 527.2390;

**IR** (film):  $\tilde{\nu}$  ( $cm^{-1}$ ): 2979, 2940, 2361, 2334, 1792, 1739, 1469, 1400, 1362 1350, 1267, 1154, 1096, 987, 955, 836, 756.

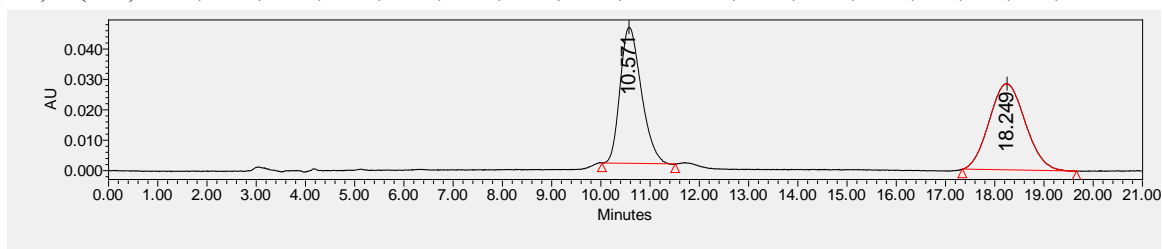

|   | Retention Time | Area    | % Area |
|---|----------------|---------|--------|
| 1 | 10.571         | 1336162 | 48.15  |
| 2 | 18.249         | 1438721 | 51.85  |

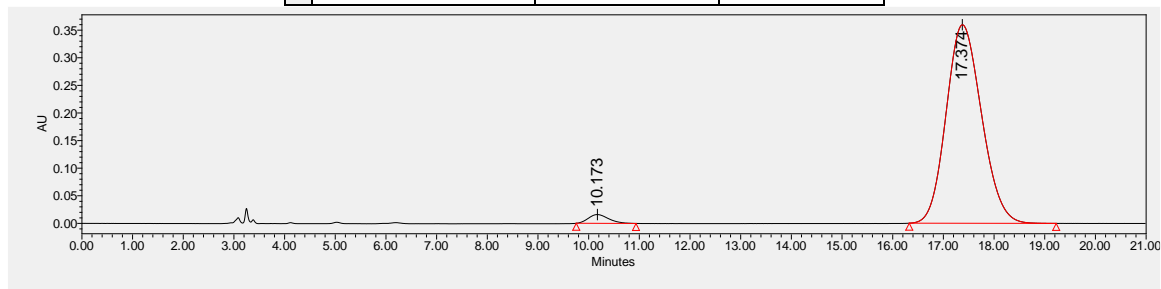

|   | Retention Time | Area     | % Area |
|---|----------------|----------|--------|
| 1 | 10.173         | 440179   | 2.46   |
| 2 | 17.374         | 17460302 | 97.54  |

**Di-*tert*-butyl (2'*S*,3*R*,3'*R*,10*a*'*R*)-3'-acetyl-2,4'-dioxo-3',4',7',8',9',10'-hexahydro-2'*H*,6'*H*-spiro[indoline-3,1'-[3,10a]epoxyprido[1,2-*a*]azepine]-1,2'-dicarboxylate**

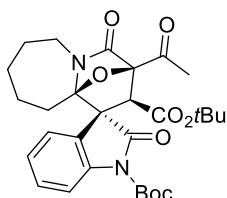

**3da**

White solid; 99% yield, 95%/94 ee, 60:40 dr; 53.4 mg; [ $\alpha$ ]<sub>D</sub><sup>20</sup> = -41.5 (*c* 0.20, CH<sub>2</sub>Cl<sub>2</sub>); determined by HPLC analysis [Daicel chiralpak IG, *n*-hexane/*i*-PrOH = 70/30, 1.0 mL/min,  $\lambda$  = 254 nm, *t*<sub>1</sub> = 8.71 min, *t*<sub>2</sub> = 11.40 min, *t*<sub>3</sub> = 14.12 min, *t*<sub>4</sub> = 17.96 min].

<sup>1</sup>H NMR (400 MHz, CDCl<sub>3</sub>)  $\delta$  7.88 (m, 1H), 7.46 – 7.33 (m, 2H), 7.20 – 7.01 (m, 1H), 4.18 (s, 1H), 3.83 (m, 1H), 2.72 – 2.59 (m, 1H), 2.48 (m, 3H), 2.35 – 2.19 (m, 1H), 1.99 – 1.75 (m, 3H), 1.65 (s, 9H), 1.63 – 1.53 (m, 1H), 1.44 – 1.13 (m, 3H), 1.11 (s, 4H), 0.93 (s, 5H).

<sup>13</sup>C NMR (101 MHz, CDCl<sub>3</sub>)  $\delta$  199.44, 198.75, 173.86, 171.87, 169.43, 168.21, 166.36, 166.06,

148.93, 148.65, 140.89, 140.27, 129.98, 129.69, 126.53, 126.23, 124.91, 124.79, 124.23, 121.79, 114.94, 114.71, 102.57, 101.17, 90.51, 89.67, 85.26, 85.20, 82.97, 82.54, 77.48, 77.16, 76.84, 63.11, 63.01, 60.29, 56.07, 43.68, 42.43, 30.78, 30.42, 30.37, 29.99, 29.67, 28.53, 28.17, 28.05, 27.72, 27.64, 27.37, 23.19, 23.11.

**ESI-HRMS** calcd for [C<sub>29</sub>H<sub>36</sub>N<sub>2</sub>O<sub>8</sub>+H<sup>+</sup>]: 541.2544, found 541.2548;

**IR** (film):  $\tilde{\nu}$  (cm<sup>-1</sup>): 2982, 2935, 2361, 2334, 1792, 1738, 1467, 1410, 1360, 1351, 1267, 1154, 1067, 1004, 837, 755.

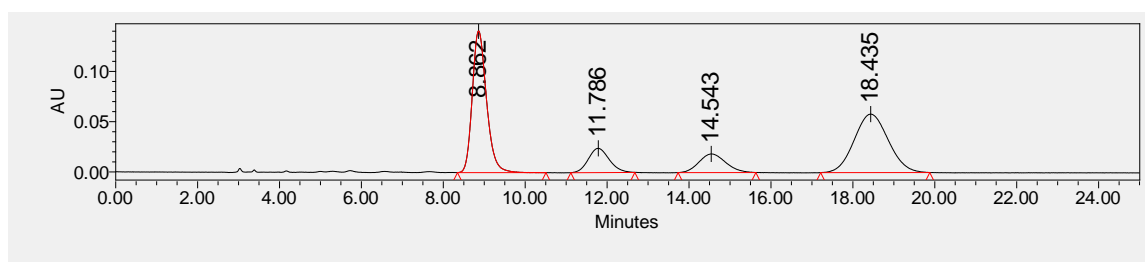

|   | Retention Time | Area    | % Area |
|---|----------------|---------|--------|
| 1 | 8.862          | 3398152 | 40.14  |
| 2 | 11.786         | 854721  | 10.10  |
| 3 | 14.543         | 841347  | 9.94   |
| 4 | 18.435         | 3372038 | 39.83  |

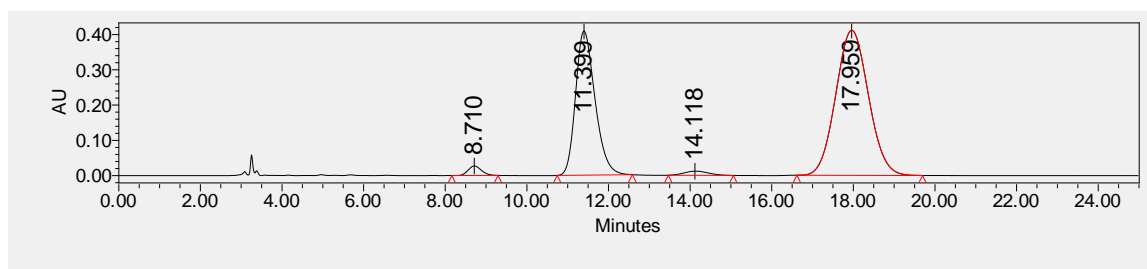

|   | Retention Time | Area     | % Area |
|---|----------------|----------|--------|
| 1 | 8.710          | 609342   | 1.63   |
| 2 | 11.399         | 13511682 | 36.05  |
| 3 | 14.118         | 490478   | 1.31   |
| 4 | 17.959         | 22869859 | 61.02  |

**Di-*tert*-butyl (1*R*,2*R*,3*S*,4*R*)-4-acetyl-6-methyl-2',5-dioxo-1-phenyl-7-oxa-6-azaspiro[2.2.1]heptane-2,3'-indoline]-1',3-dicarboxylate**

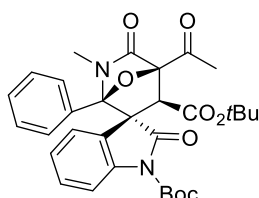

**3ea**

White solid; 92% yield, 94% ee, > 95:5 dr; 51.7 mg;  $[\alpha]_D^{21} = +13.9$  确认 ( $c$  0.46,  $\text{CH}_2\text{Cl}_2$ );

determined by HPLC analysis [Daicel chiralpak IG, *n*-hexane/*i*-PrOH = 80/20, 1.0 mL/min,  $\lambda = 230$  nm,  $t_1 = 9.01$  min,  $t_2 = 18.97$  min].

$^1\text{H NMR}$  (400 MHz,  $\text{CDCl}_3$ )  $\delta$  7.66 (d,  $J = 7.8$  Hz, 1H), 7.24 (dd,  $J = 9.9, 5.7$  Hz, 5H), 7.15 (t,  $J = 7.7$  Hz, 2H), 6.84 (td,  $J = 7.7, 1.0$  Hz, 1H), 3.96 (s, 1H), 2.72 (s, 3H), 2.57 (s, 3H), 1.68 (s, 9H), 0.90 (s, 9H).

$^{13}\text{C NMR}$  (101 MHz,  $\text{CDCl}_3$ )  $\delta$  198.65, 172.95, 168.26, 166.15, 148.77, 140.10, 130.14, 129.92, 129.47, 128.76, 126.87, 126.32, 124.97, 124.72, 114.40, 100.48, 90.45, 85.41, 83.04, 77.48, 77.16, 76.84, 63.00, 61.39, 28.58, 28.55, 28.22, 28.14, 28.12, 27.25.

**ESI-HRMS** calcd for  $[\text{C}_{32}\text{H}_{36}\text{N}_2\text{O}_8 + \text{H}^+]$ : 563.2388, found 563.2386.

**IR** (film):  $\tilde{\nu}$  ( $\text{cm}^{-1}$ ): 2980, 2935, 2361, 2335, 1791, 1737, 1604, 1472, 1424, 1362, 1282, 1254, 1151, 1103, 1080, 1029, 965, 949, 935, 754, 702.

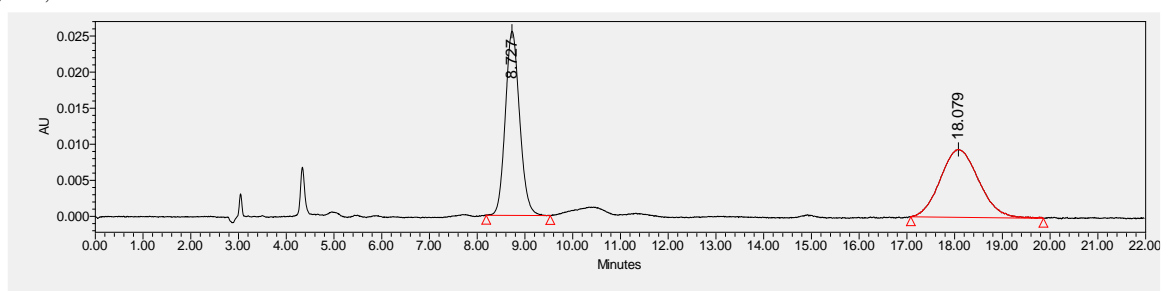

|   | Name | Retention Time | Area   | % Area |
|---|------|----------------|--------|--------|
| 1 |      | 8.727          | 532007 | 50.23  |
| 2 |      | 18.079         | 527059 | 49.77  |

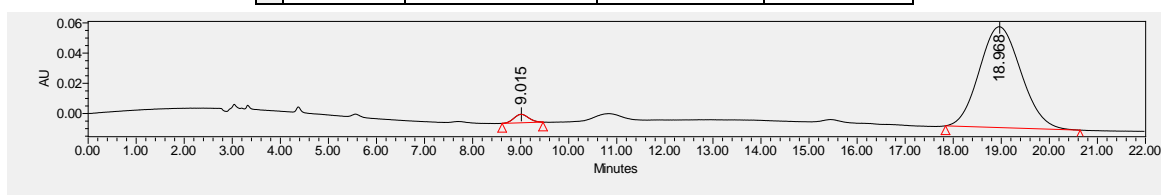

|   | Name | Retention Time | Area    | % Area |
|---|------|----------------|---------|--------|
| 1 |      | 9.015          | 119765  | 2.89   |
| 2 |      | 18.968         | 4029570 | 97.11  |

**Di-tert-butyl (1*S*,2*R*,3*S*,4*R*)-4-acetyl-1-(2-chlorophenyl)-6-methyl-2',5-dioxo-7-oxa-6-azaspiro[bicyclo[2.2.1]heptane-2,3'-indoline]-1',3-dicarboxylate**

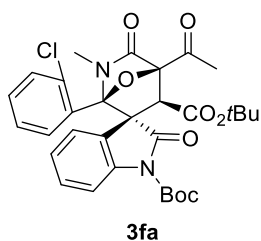

White solid; 93% yield, 98%/98% ee, 75:25 dr; 55.3 mg;  $[\alpha]^{22}_{\text{D}} = +15.3$  (*c* 0.46, CH<sub>2</sub>Cl<sub>2</sub>); determined by HPLC analysis [Daicel chiralpak IG, *n*-hexane/*i*-PrOH = 80/20, 1.0 mL/min,  $\lambda = 230$  nm,  $t_1 = 6.80$  min,  $t_2 = 10.67$  min,  $t_3 = 14.36$  min,  $t_4 = 18.25$  min].

**<sup>1</sup>H NMR** (400 MHz, CDCl<sub>3</sub>)  $\delta$  8.11 (d, *J* = 8.0 Hz, 1H), 7.71 (d, *J* = 8.2 Hz, 1H), 7.36 (t, *J* = 7.7 Hz, 1H), 7.27 (d, *J* = 14.9 Hz, 1H), 7.27 (s, 2H), 7.16 (d, *J* = 7.9 Hz, 2H), 6.96 (t, *J* = 7.6 Hz, 2H), 6.79 (t, *J* = 7.6 Hz, 1H), 3.97 (s, 1H), 2.96 (s, 3H), 2.68 (s, 1H), 2.56 (s, 4H), 1.68 (s, 3H), 0.89 (d, *J* = 6.9 Hz, 12H).

**<sup>13</sup>C NMR** (101 MHz, CDCl<sub>3</sub>)  $\delta$  198.64, 173.89, 168.15, 166.19, 148.99, 140.80, 131.80, 131.71, 131.55, 130.53, 129.54, 128.73, 127.56, 126.42, 124.12, 123.90, 114.62, 100.21, 89.47, 84.88, 83.01, 77.48, 77.16, 76.84, 63.49, 62.15, 28.23, 28.20, 28.07, 27.20.

**ESI-HRMS** calcd for [C<sub>32</sub>H<sub>35</sub><sup>34,9689</sup>ClN<sub>2</sub>O<sub>8</sub>+Na<sup>+</sup>]: 619.1818, found 619.1813; **ESI-HRMS** calcd for [C<sub>32</sub>H<sub>35</sub><sup>36,9659</sup>ClN<sub>2</sub>O<sub>8</sub>+Na<sup>+</sup>]: 620.1851, found 620.1847;

**IR** (film):  $\tilde{\nu}$  (cm<sup>-1</sup>): 2980, 2935, 2361, 2335, 1791, 1737, 1604, 1472, 1424, 1362, 1282, 1254, 1151, 1103, 1080, 1029, 965, 949, 935, 754, 702.

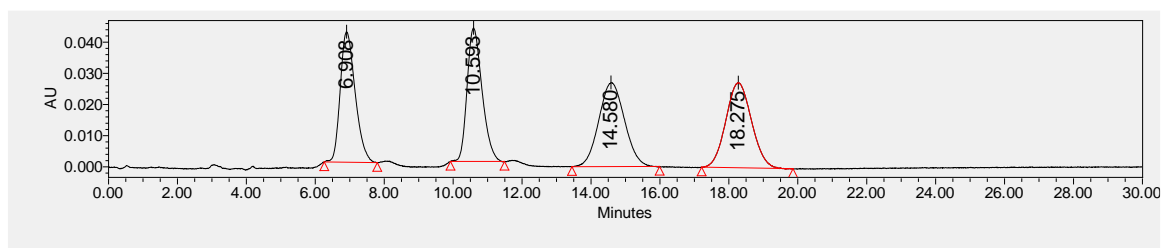

|   | Retention Time | Area   | % Area |
|---|----------------|--------|--------|
| 1 | 6.908          | 501396 | 25.55  |
| 2 | 10.593         | 477902 | 24.36  |
| 3 | 14.578         | 484276 | 24.68  |
| 4 | 18.273         | 498517 | 25.41  |

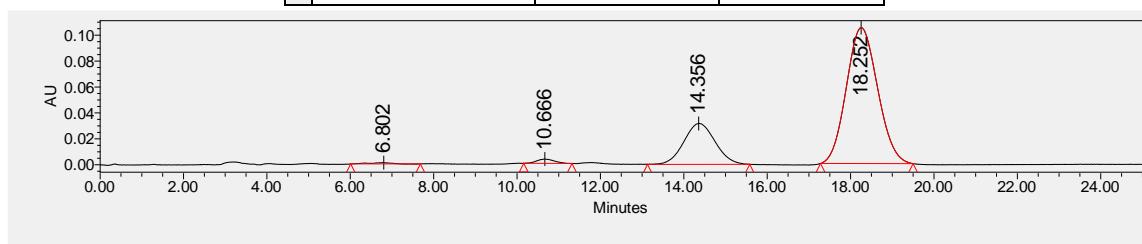

|   | Retention Time | Area    | % Area |
|---|----------------|---------|--------|
| 1 | 6.802          | 37143   | 0.51   |
| 2 | 10.666         | 95766   | 1.32   |
| 3 | 14.356         | 1647679 | 22.76  |
| 4 | 18.252         | 5459685 | 75.41  |

**Di-tert-butyl (1*R*,2*R*,3*S*,4*R*)-4-acetyl-1-(3-chlorophenyl)-6-methyl-2',5-dioxo-7-oxa-6-azaspiro[bicyclo[2.2.1]heptane-2,3'-indoline]-1',3-dicarboxylate**



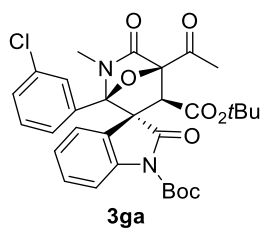

White solid; 90% yield, 98% ee, 98:2 dr; 53.7 mg;  $[\alpha]^{23}_D = +41.9$  (*c* 0.50, CH<sub>2</sub>Cl<sub>2</sub>); determined by HPLC analysis [Daicel chiralpak IG, *n*-hexane/*i*-PrOH = 80/20, 1.0 mL/min,  $\lambda = 230$  nm,  $t_1 = 8.05$  min,  $t_2 = 9.65$  min,  $t_3 = 10.61$  min,  $t_4 = 13.53$  min].

**<sup>1</sup>H NMR** (400 MHz, CDCl<sub>3</sub>)  $\delta$  7.66 (d, *J* = 8.1 Hz, 1H), 7.33 (s, 1H), 7.25 – 7.21 (m, 1H), 7.20 – 7.11 (m, 3H), 6.97 (d, *J* = 7.3 Hz, 1H), 6.87 (td, *J* = 7.7, 1.0 Hz, 1H), 3.95 (s, 1H), 2.73 (s, 3H), 2.56 (s, 3H), 1.67 (s, 9H), 0.89 (s, 9H).

**<sup>13</sup>C NMR** (101 MHz, CDCl<sub>3</sub>)  $\delta$  198.29, 172.66, 168.05, 165.99, 148.64, 140.06, 135.09, 131.84, 130.45, 130.04, 129.75, 126.80, 126.72, 124.89, 124.56, 124.18, 114.45, 99.69, 90.47, 85.61, 83.22,

77.48, 77.16, 76.84, 62.97, 61.10, 61.08, 28.59, 28.21, 28.21, 28.15, 27.28, 27.28.

**ESI-HRMS** calcd for [C<sub>32</sub>H<sub>35</sub><sup>34.9689</sup>CIN<sub>2</sub>O<sub>8</sub>+Na<sup>+</sup>]: 619.1818, found 619.1815; **ESI-HRMS** calcd for [C<sub>32</sub>H<sub>35</sub><sup>36.9659</sup>CIN<sub>2</sub>O<sub>8</sub>+Na<sup>+</sup>]: 620.1851, found 620.1844;

**IR** (film):  $\tilde{\nu}$  (cm<sup>-1</sup>) 2980, 2935, 2361, 2334, 1793, 1741, 1605, 1571, 1473, 1424, 1379, 1364, 1282, 1255, 1153, 1101, 1024, 861, 756, 681, 582.

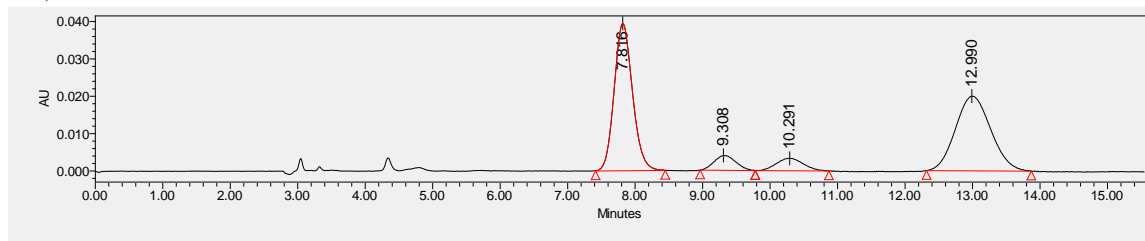

|   | Name | Retention Time | Area   | % Area |
|---|------|----------------|--------|--------|
| 1 |      | 7.816          | 743097 | 44.95  |
| 2 |      | 9.308          | 89108  | 5.39   |
| 3 |      | 10.291         | 93216  | 5.64   |
| 4 |      | 12.990         | 727799 | 44.02  |

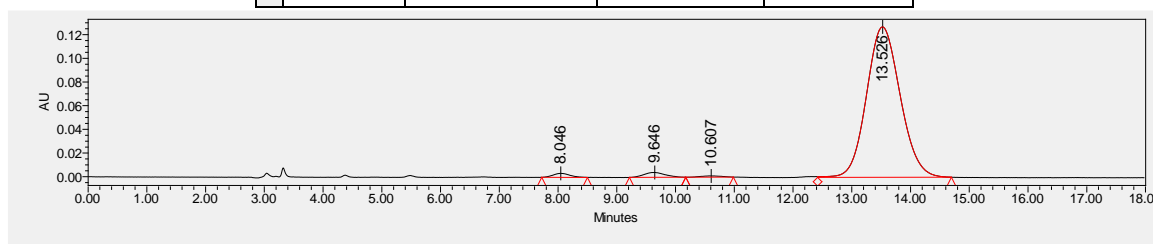

|   | Name | Retention Time | Area    | % Area |
|---|------|----------------|---------|--------|
| 1 |      | 8.046          | 67659   | 1.29   |
| 2 |      | 9.646          | 103614  | 1.97   |
| 3 |      | 10.607         | 26207   | 0.50   |
| 4 |      | 13.526         | 5057097 | 96.24  |

**Di-tert-butyl (1R,2R,3S,4R)-4-acetyl-1-(4-chlorophenyl)-6-methyl-2',5-dioxo-7-oxa-6-azaspiro[bicyclo[2.2.1]heptane-2,3'-indoline]-1',3-dicarboxylate**

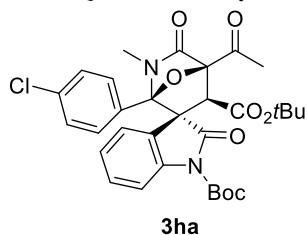

White solid; 89% yield, 96% ee, > 95:5 dr; 53.1 mg;  $[\alpha]^{23}_D = +29.0$  (*c* 0.53, CH<sub>2</sub>Cl<sub>2</sub>); determined by HPLC analysis [Daicel chiralpak IG, *n*-hexane/*i*-PrOH = 80/20, 1.0 mL/min,  $\lambda = 230$  nm,  $t_1 = 8.41$  min,  $t_2 = 12.74$  min].

**<sup>1</sup>H NMR** (400 MHz, CDCl<sub>3</sub>)  $\delta$  7.66 (d, *J* = 8.1 Hz, 1H), 7.24 – 7.11 (m, 6H), 6.87 (td, *J* = 7.7, 0.9 Hz, 1H), 3.95 (s, 1H), 2.70 (s, 3H), 2.55 (s, 3H), 1.67 (s, 9H), 0.88 (s, 9H).

**<sup>13</sup>C NMR** (101 MHz, CDCl<sub>3</sub>)  $\delta$  198.26, 172.75, 168.11, 165.99, 148.66, 140.05, 136.35, 129.73, 129.15, 128.52, 127.79, 126.78, 124.94, 124.68, 114.52, 99.90, 90.46, 85.60, 83.19, 77.48, 77.16, 76.84, 62.91, 61.36, 61.34, 28.54, 28.53, 28.21, 28.12, 28.10, 27.24.

**ESI-HRMS** calcd for [C<sub>32</sub>H<sub>35</sub><sup>34.9689</sup>CIN<sub>2</sub>O<sub>8</sub>+Na<sup>+</sup>]: 619.1818, found 619.1816; **ESI-HRMS** calcd for [C<sub>32</sub>H<sub>35</sub><sup>36.9659</sup>CIN<sub>2</sub>O<sub>8</sub>+Na<sup>+</sup>]: 620.1851, found 620.1845;

**IR** (film):  $\tilde{\nu}$  (cm<sup>-1</sup>) 2980, 2936, 2360, 1792, 1742, 1604, 1471, 1381, 1282, 1282, 1251, 1153, 1095, 1046, 1014, 968, 835, 756.

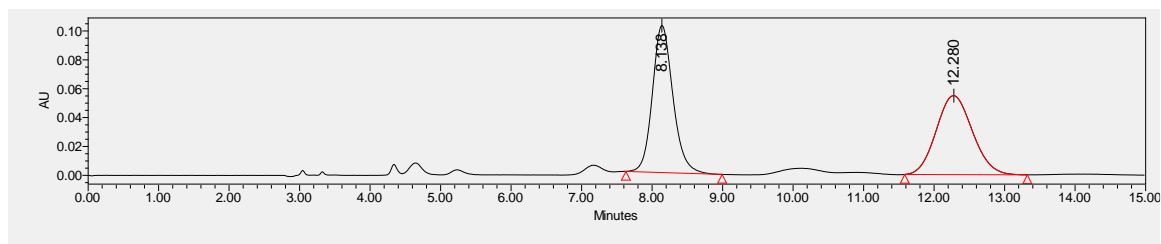

|   | Name | Retention Time | Area    | % Area |
|---|------|----------------|---------|--------|
| 1 |      | 8.138          | 2064666 | 51.44  |
| 2 |      | 12.280         | 1949271 | 48.56  |

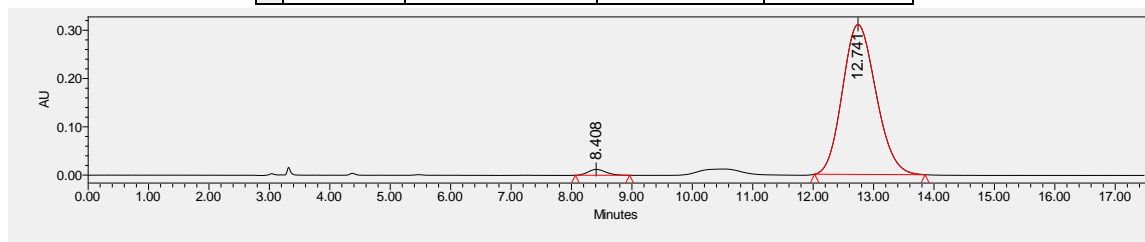

|   | Name | Retention Time | Area     | % Area |
|---|------|----------------|----------|--------|
| 1 |      | 8.408          | 247535   | 2.03   |
| 2 |      | 12.741         | 11955911 | 97.97  |

**Di-*tert*-butyl (1*R*,2*R*,3*S*,4*R*)-4-acetyl-6-methyl-2',5-dioxo-1-(*p*-tolyl)-7-oxa-6-azaspiro[bicyclo[2.2.1]heptane-2,3'-indoline]-1',3-dicarboxylate**

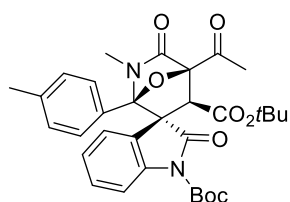

**3ia**

White solid; 91% yield, 85% ee, > 95:5 dr; 52.6 mg;  $[\alpha]_D^{23} = +10.7$  (*c* 0.46, CH<sub>2</sub>Cl<sub>2</sub>); determined by HPLC analysis [Daicel chiralpak IG, *n*-hexane/*i*-PrOH = 80/20, 1.0 mL/min,  $\lambda = 230$  nm,  $t_1 = 9.38$  min,  $t_2 = 15.64$  min].

**<sup>1</sup>H NMR** (400 MHz, CDCl<sub>3</sub>)  $\delta$  7.66 (d, *J* = 8.5 Hz, 1H), 7.19 – 7.12 (m, 2H), 7.09 – 6.99 (m, 4H), 6.85 (t, *J* = 7.6 Hz, 1H), 3.94 (s, 1H), 2.69 (s, 3H), 2.56 (s, 3H), 2.23 (s, 3H), 1.67 (s, 9H), 0.88 (s, 9H).

**<sup>13</sup>C NMR** (101 MHz, CDCl<sub>3</sub>)  $\delta$  198.75, 173.02, 168.29, 166.19, 148.80, 140.19, 140.09, 129.44, 129.40, 126.96, 126.91, 126.25, 125.12, 124.76, 114.37, 100.60, 90.45, 85.36, 82.98, 77.48, 77.16, 76.84, 62.96, 61.51, 28.50, 28.22, 28.15, 27.25, 21.32.

**ESI-HRMS** calcd for [C<sub>33</sub>H<sub>38</sub>N<sub>2</sub>O<sub>8</sub>+H<sup>+</sup>]: 577.2544, found 577.2546;

**IR** (film):  $\tilde{\nu}$  (cm<sup>-1</sup>) 2981, 2935, 2360, 2336, 1791, 1738, 1609, 1471, 1423, 1385, 1361, 1276, 1258, 1153, 1099, 1048, 1022, 966, 830, 755, 697, 428.

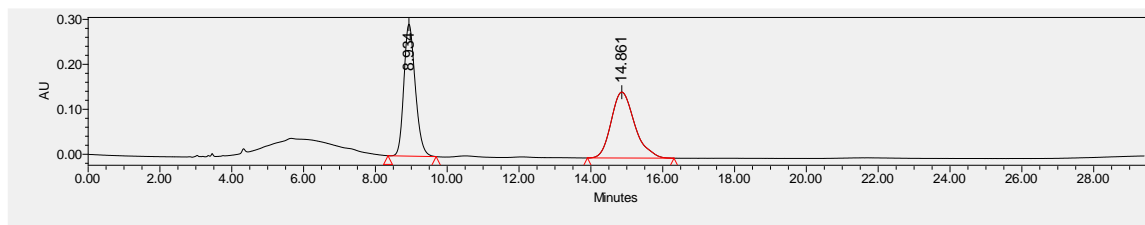

|   | Name | Retention Time | Area    | % Area |
|---|------|----------------|---------|--------|
| 1 |      | 8.934          | 6493348 | 49.40  |
| 2 |      | 14.861         | 6649916 | 50.60  |

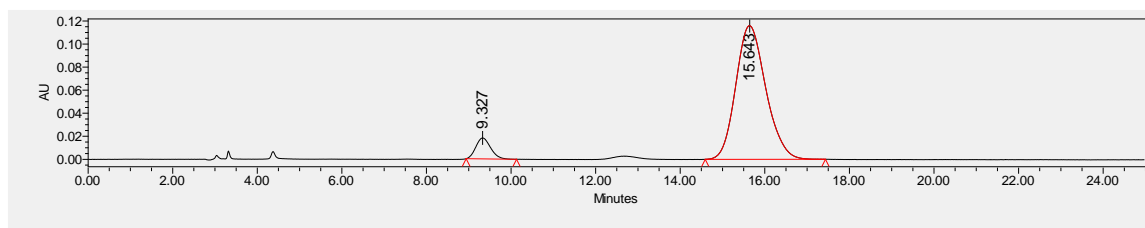

|   | Name | Retention Time | Area    | % Area |
|---|------|----------------|---------|--------|
| 1 |      | 9.327          | 437290  | 7.13   |
| 2 |      | 15.643         | 5697246 | 92.87  |

**Di-*tert*-butyl (1*R*,2*R*,3*S*,4*R*)-4-acetyl-1-(4-methoxyphenyl)-6-methyl-2',5-dioxo-7-oxa-6-azaspiro[bicyclo[2.2.1]heptane-2,3'-indoline]-1',3-dicarboxylate**

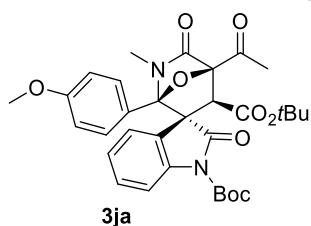

White solid; 86% yield, 58% ee, > 95:5 dr; 50.8 mg;  $[\alpha]_D^{23} = +4.0$  (*c* 0.22, CH<sub>2</sub>Cl<sub>2</sub>); determined by HPLC analysis [Daicel chiralpak IG, *n*-hexane/*i*-PrOH = 85/15, 1.0 mL/min,  $\lambda = 210$  nm,  $t_1 = 21.89$  min,  $t_2 = 26.77$  min].

**<sup>1</sup>H NMR** (400 MHz, CDCl<sub>3</sub>)  $\delta$  7.67 (d, *J* = 8.1 Hz, 1H), 7.16 (t, *J* = 8.0 Hz, 2H), 7.09 (d, *J* = 7.7 Hz, 2H), 6.86 (t, *J* = 7.6 Hz, 1H), 6.73 (d, *J* = 8.6 Hz, 2H), 3.94 (s, 1H), 3.72 (s, 3H), 2.68 (s, 3H), 2.56 (s, 3H), 1.67 (s, 9H), 0.88 (s, 9H).

**<sup>13</sup>C NMR** (101 MHz, CDCl<sub>3</sub>)  $\delta$  198.81, 173.01, 168.26, 166.18, 160.57, 148.79, 140.04, 129.45, 127.89, 126.93, 125.14, 124.82, 121.94, 114.42, 114.10, 100.52, 90.48, 85.40, 82.99, 77.48, 77.16,

76.84, 62.99, 61.60, 55.34, 28.48, 28.22, 28.17, 27.23.

**ESI-HRMS** calcd for [C<sub>33</sub>H<sub>38</sub>N<sub>2</sub>O<sub>9</sub>+H<sup>+</sup>]: 593.2494, found 593.2487;

**IR** (film):  $\tilde{\nu}$  (cm<sup>-1</sup>) 3005, 2983, 2360, 2337, 1793, 1735, 1610, 1519, 1462, 1390, 1367, 1333, 1274, 1259, 1151, 1094, 1028, 838, 751, 439, 425.

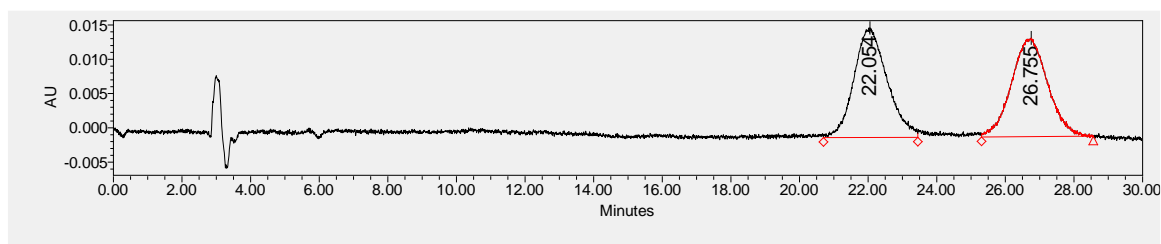

|   | Retention Time | Area    | % Area |
|---|----------------|---------|--------|
| 1 | 22.054         | 1070467 | 50.55  |
| 2 | 26.755         | 1047109 | 49.45  |

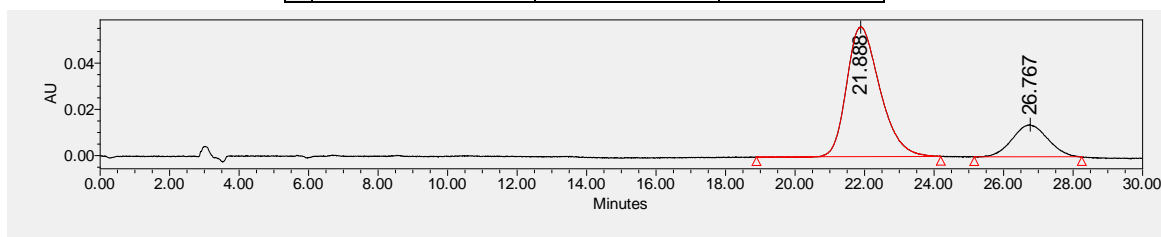

|   | Retention Time | Area    | % Area |
|---|----------------|---------|--------|
| 1 | 21.888         | 3735684 | 79.20  |
| 2 | 26.767         | 981278  | 20.80  |

**Di-*tert*-butyl (1*R*,2*R*,3*S*,4*R*)-4-acetyl-6-methyl-1-(naphthalen-2-yl)-2',5-dioxo-7-oxa-6-azaspiro[bicyclo[2.2.1]heptane-2,3'-indoline]-1',3-dicarboxylate**

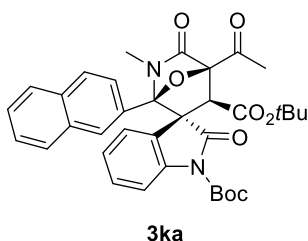

White solid; 91% yield, 79% ee, > 95:5 dr; 55.7mg;  $[\alpha]_D^{23} = +59.5$  (*c* 0.34, CH<sub>2</sub>Cl<sub>2</sub>); determined by HPLC analysis [Daicel chiralpak IG, *n*-hexane/*i*-PrOH = 70/30, 1.0 mL/min,  $\lambda = 210$  nm,  $t_1 = 7.80$  min,  $t_2 = 11.01$  min].

<sup>1</sup>H NMR (400 MHz, CDCl<sub>3</sub>)  $\delta$  7.83 (s, 1H), 7.80 – 7.71 (m, 2H), 7.66 (dd, *J* = 15.1, 8.3 Hz, 2H), 7.54 – 7.47 (m, 2H), 7.21 – 7.12 (m, 2H), 7.08 (td, *J* = 8.2, 1.3 Hz, 1H), 6.76 (td, *J* = 7.7, 0.9 Hz, 1H), 4.02 (s, 1H), 2.73 (s, 3H), 2.62 (s, 3H), 1.71 (s, 9H), 1.60 (s, 3H), 0.90 (s, 9H).

<sup>13</sup>C NMR (101 MHz, CDCl<sub>3</sub>)  $\delta$  198.69, 173.13, 168.31, 166.17, 148.83, 140.10, 133.61, 132.65, 129.54, 128.77, 128.55, 127.81, 127.55, 127.26, 127.05, 126.87, 124.90, 124.86, 122.48, 114.37, 100.65, 90.58, 85.51, 83.13, 77.48, 77.16, 76.84, 63.07, 61.45, 28.68, 28.26, 28.24, 27.27.

**ESI-HRMS** calcd for [C<sub>36</sub>H<sub>38</sub>N<sub>2</sub>O<sub>8</sub>+H<sup>+</sup>]: 613.2544, found 613.2545;

**IR** (film):  $\tilde{\nu}$  (cm<sup>-1</sup>) 3056, 2979, 2932, 1791, 1738, 1604, 1474, 1423, 1389, 1361, 1287, 1248, 1154, 1101, 1028, 959, 856, 823, 790, 757, 620, 476.

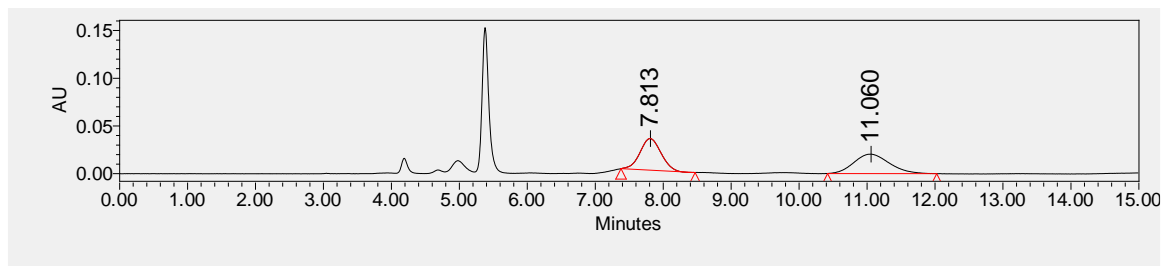

|   | Retention Time | Area   | % Area |
|---|----------------|--------|--------|
| 1 | 7.813          | 713719 | 49.15  |
| 2 | 11.060         | 738440 | 50.85  |

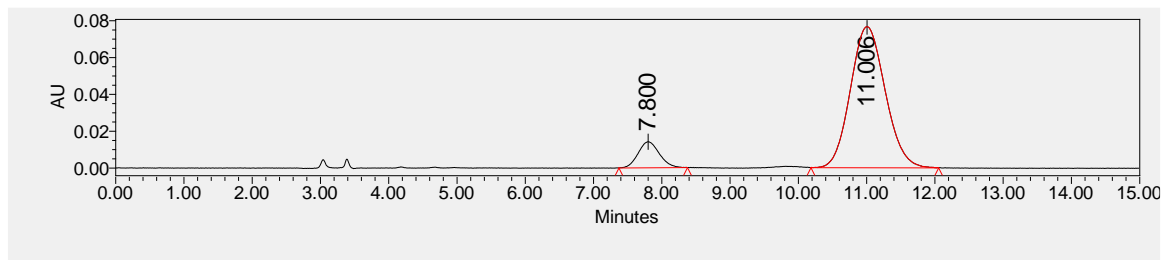

|   | Retention Time | Area    | % Area |
|---|----------------|---------|--------|
| 1 | 7.800          | 306720  | 10.16  |
| 2 | 11.006         | 2710841 | 89.84  |

**1',3-Di-tert-butyl 4-ethyl (1*R*,2*R*,3*S*,4*S*)-1,6-dimethyl-2',5-dioxo-7-oxa-6-azaspiro[bicyclo[2.2.1]heptane-2,3'-indoline]-1',3,4-tricarboxylate**

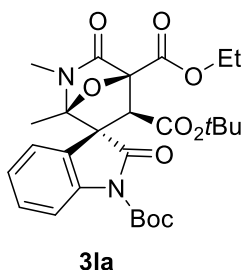

White solid; 83% yield, 98%/70% ee, 87:13 dr; 44.0 mg;  $[\alpha]_D^{26} = -91.5$  (*c* 0.28, CH<sub>2</sub>Cl<sub>2</sub>);

determined by HPLC analysis [Daicel chiralpak IF, *n*-hexane/*i*-PrOH = 70/30, 0.5 mL/min,  $\lambda = 230$  nm,  $t_1 = 15.80$  min,  $t_2 = 16.69$  min,  $t_3 = 18.01$  min,  $t_4 = 19.00$  min].

<sup>1</sup>H NMR (400 MHz, CDCl<sub>3</sub>)  $\delta$  7.80 (d, *J* = 8.2 Hz, 1H), 7.45 (d, *J* = 7.6 Hz, 1H), 7.36 (t, *J* = 7.9 Hz, 1H), 7.14 (t, *J* = 7.6 Hz, 1H), 4.48 (dt, *J* = 10.7, 7.2 Hz, 1H), 4.41 – 4.32 (m, 1H), 3.76 (s, 1H), 2.90 (s, 3H), 1.63 (s, 9H), 1.33 (t, *J* = 7.1 Hz, 3H), 1.30 (s, 3H), 0.93 (s, 9H).

<sup>13</sup>C NMR (101 MHz, CDCl<sub>3</sub>)  $\delta$  171.89, 168.59, 166.15, 164.07, 148.67, 140.28, 129.85, 126.81, 124.96, 124.67, 114.70, 98.61, 86.52, 85.31, 82.75, 77.48, 77.16, 76.84, 63.20, 62.35, 58.84, 28.17,

27.78, 27.66, 27.38, 14.68, 14.20.

**ESI-HRMS** calcd for [C<sub>27</sub>H<sub>34</sub>N<sub>2</sub>O<sub>9</sub>+H<sup>+</sup>]: 531.2337, found 531.2338;

**IR** (film):  $\tilde{\nu}$  (cm<sup>-1</sup>) 2987, 2937, 1760, 1736, 1604, 1472, 1400, 1366, 1344, 1281, 1256, 1149, 1092, 1048, 1005, 855, 756, 584, 509.

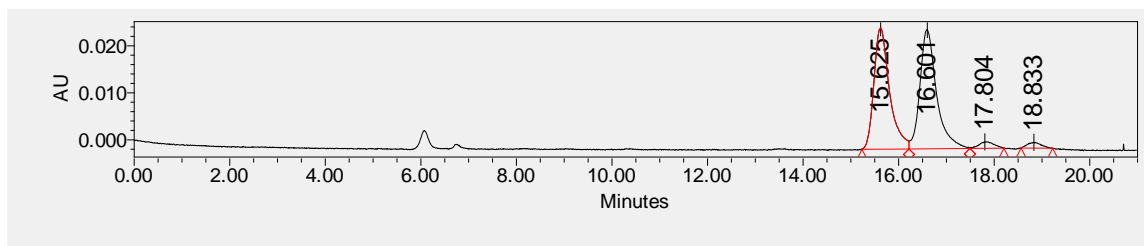

|   | Retention Time | Area   | % Area |
|---|----------------|--------|--------|
| 1 | 15.625         | 587237 | 46.81  |
| 2 | 16.601         | 612359 | 48.82  |
| 3 | 17.804         | 30228  | 2.41   |
| 4 | 18.833         | 24573  | 1.96   |

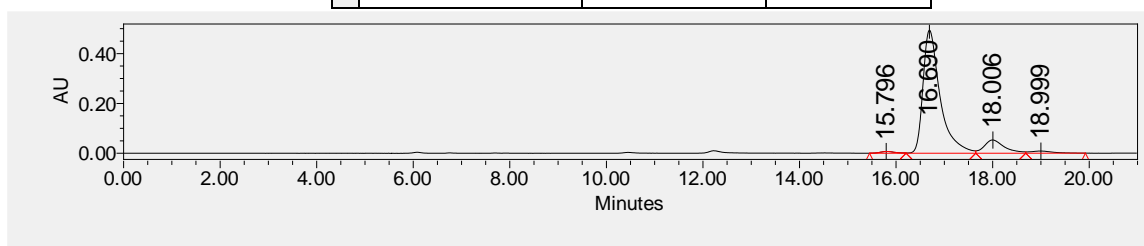

|   | Retention Time | Area     | % Area |
|---|----------------|----------|--------|
| 1 | 15.796         | 146023   | 1.03   |
| 2 | 16.690         | 12164369 | 86.17  |
| 3 | 18.006         | 1530901  | 10.84  |
| 4 | 18.999         | 275426   | 1.95   |

**Di-*tert*-butyl (3*R*,6'*S*,7'*S*,8*a*'*R*)-2,5'-dioxo-2',3',6',7'-tetrahydro-1'*H*,5'*H*-spiro[indoline-3,8']-[6,8*a*]epoxyindolizine]-1,7'-dicarboxylate**

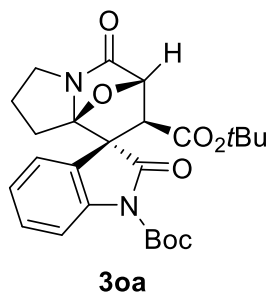

White solid; 67% yield, 58% ee, > 95:5 dr; 31.4 mg;  $[\alpha]_D^{23} = -47.9$  (*c* 0.096, CH<sub>2</sub>Cl<sub>2</sub>); determined by HPLC analysis [Daicel chiralpak IF, *n*-hexane/*i*-PrOH = 70/30, 0.5 mL/min,  $\lambda = 230$  nm,  $t_1 = 13.26$  min,  $t_2 = 15.09$  min].

**<sup>1</sup>H NMR** (400 MHz, CDCl<sub>3</sub>)  $\delta$  7.92 (d,  $J = 8.0$  Hz, 1H), 7.40 – 7.33 (m, 1H), 7.20 (dd,  $J = 7.7, 1.0$  Hz, 1H), 7.10 (td,  $J = 7.6, 1.0$  Hz, 1H), 4.87 (d,  $J = 5.1$  Hz, 1H), 3.87 (d,  $J = 5.1$  Hz, 1H), 3.79 (ddd,  $J = 10.5, 7.9, 1.8$  Hz, 1H), 2.76 – 2.65 (m, 1H), 2.15 (ddd,  $J = 14.0, 7.7, 2.0$  Hz, 1H), 2.00 (dd,  $J = 21.0, 10.6$  Hz, 1H), 1.75 – 1.68 (m, 1H), 1.65 (s, 9H), 1.42 – 1.35 (m, 1H), 1.11 (s, 9H).

**<sup>13</sup>C NMR** (101 MHz, CDCl<sub>3</sub>)  $\delta$  174.79, 174.13, 166.87, 149.01, 140.92, 129.79, 126.33, 124.59, 122.92, 114.92, 108.17, 85.20, 82.85, 80.88, 77.48, 77.16, 76.84, 59.65, 55.58, 44.25, 28.21, 27.83, 26.10, 25.70.

**ESI-HRMS** calcd for [C<sub>25</sub>H<sub>30</sub>N<sub>2</sub>O<sub>7</sub>+H<sup>+</sup>]: 471.2126, found 471.2131;

**IR** (film):  $\tilde{\nu}$  (cm<sup>-1</sup>) 2982, 2938, 2361, 23344, 1742, 1528, 1468, 1398, 1345, 1303, 1269, 1150, 1116, 1028, 895, 846, 755, 679.

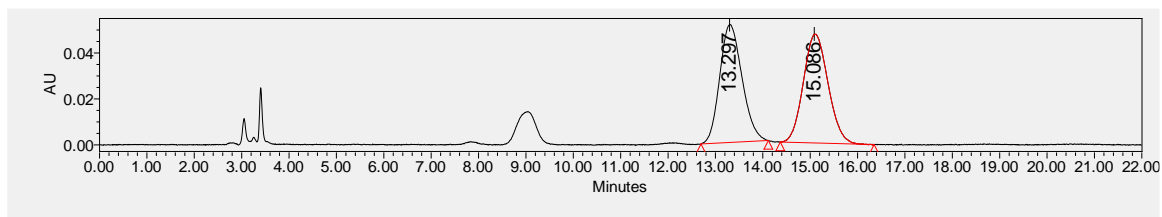

|   | Retention Time | Area    | % Area |
|---|----------------|---------|--------|
| 1 | 13.297         | 1679840 | 49.50  |

|   |        |         |       |
|---|--------|---------|-------|
| 2 | 15.086 | 1713955 | 50.50 |
|---|--------|---------|-------|

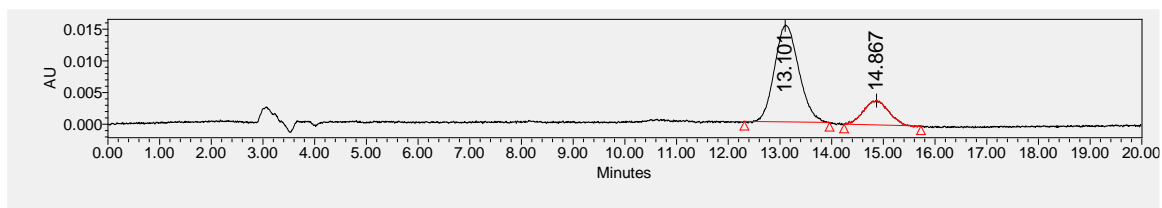

|   | Retention Time | Area   | % Area |
|---|----------------|--------|--------|
| 1 | 13.101         | 497847 | 79.27  |
| 2 | 14.867         | 130200 | 20.73  |

**Di-*tert*-butyl (1*R*,2*R*,3*S*,4*R*)-4-acetyl-6-benzyl-1-methyl-2',5-dioxo-7-oxa-6-azaspiro[bicyclo[2.2.1]heptane-2,3'-indoline]-1',3-dicarboxylate**

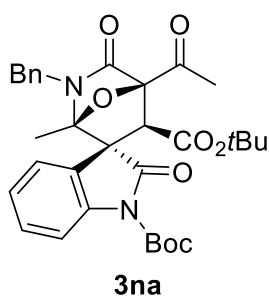

White solid; 99% yield, 99%/95% ee, 65:35 dr; 57.0 mg;  $[\alpha]_D^{23} = +15.9$  (*c* 0.088, CH<sub>2</sub>Cl<sub>2</sub>); determined by HPLC analysis [Daicel chiralpak IF, *n*-hexane/*i*-PrOH = 70/30, 0.5 mL/min,  $\lambda = 230$  nm,  $t_1 = 12.79$  min,  $t_2 = 16.69$  min,  $t_3 = 17.67$  min,  $t_4 = 18.14$  min].

**<sup>1</sup>H NMR** (400 MHz, CDCl<sub>3</sub>)  $\delta$  7.97 (d, *J* = 8.2 Hz, 1H), 7.47 – 7.31 (m, 2H), 7.32 – 7.27 (m, 2H), 7.18 (dt, *J* = 28.5, 8.5 Hz, 5H), 5.17 (t, *J* = 15.6 Hz, 1H), 3.89 (d, *J* = 1.5 Hz, 1H), 3.41 (d, *J* = 16.3 Hz, 1H), 2.52 (m, 3H), 1.65 (m, 9H), 1.27 (s, 2H), 1.16 (s, 1H), 1.13 (s, 6H), 0.94 (s, 3H).

**<sup>13</sup>C NMR** (101 MHz, CDCl<sub>3</sub>)  $\delta$  199.05, 173.62, 170.18, 166.05, 148.89, 140.94, 137.23, 130.22, 129.00, 127.85, 126.94, 126.24, 125.04, 124.41, 115.16, 100.34, 90.09, 85.31, 82.80, 77.48, 77.16,

76.84, 63.83, 55.57, 46.49, 28.23, 28.18, 27.78, 27.39, 13.99.

**ESI-HRMS** calcd for [C<sub>32</sub>H<sub>36</sub>N<sub>2</sub>O<sub>8</sub>+H<sup>+</sup>]: 577.2544, found 577.2542;

**IR** (film):  $\tilde{\nu}$  (cm<sup>-1</sup>) 2980, 2929, 2360, 2333, 1792, 1735, 1605, 1471, 1402, 1361, 1351, 1286, 1255, 1151, 1100, 1004, 845, 756, 706, 624, 597, 467.

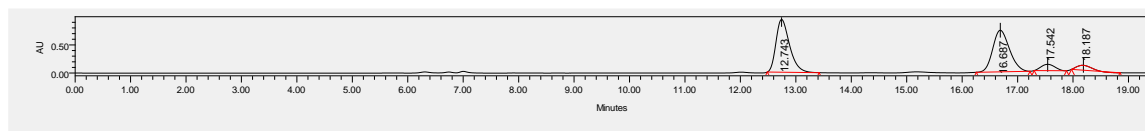

|   | Retention Time | Area     | % Area |
|---|----------------|----------|--------|
| 1 | 12.743         | 15896915 | 45.49  |
| 2 | 16.687         | 15489402 | 44.32  |
| 3 | 17.542         | 1915069  | 5.48   |
| 4 | 18.187         | 1648045  | 4.72   |

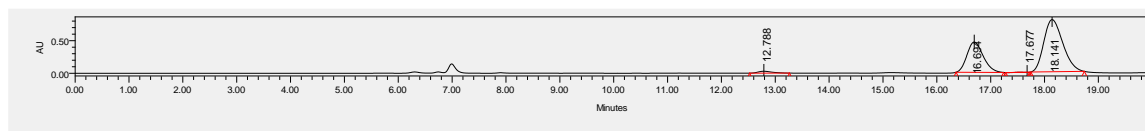

|   | Retention Time | Area     | % Area |
|---|----------------|----------|--------|
| 1 | 12.788         | 526737   | 1.76   |
| 2 | 16.694         | 9720802  | 32.56  |
| 3 | 17.677         | 26658    | 0.09   |
| 4 | 18.141         | 19576312 | 65.58  |

**Di-tert-butyl (2R,2'S,3S,3'R,9a'R)-2-hydroxy-3'-(R)-1-hydroxyethyl)-4'-oxo-3',4',6',7',8',9'-hexahydro-2'H-spiro[indoline-3,1'-[3,9a]epoxyquinolizine]-1,2'-dicarboxylate**

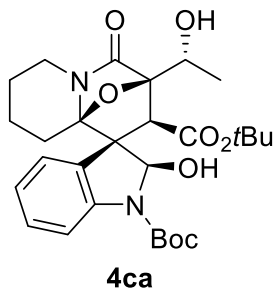

White solid; 89% yield, 96% ee, > 95:5 dr; 47.0 mg;  $[\alpha]^{23}_D = +59.4$  (c 0.096, CH<sub>2</sub>Cl<sub>2</sub>); determined by HPLC analysis [Daicel chiralpak IA, *n*-hexane/*i*-PrOH = 90/10, 1.0 mL/min,  $\lambda = 254$  nm,  $t_1 = 4.57$  min,  $t_2 = 5.54$  min].

<sup>1</sup>H NMR (400 MHz, CDCl<sub>3</sub>)  $\delta$  7.31 (d,  $J = 7.6$  Hz, 1H), 7.26 (d,  $J = 3.2$  Hz, 2H), 6.97 (t,  $J = 7.6$  Hz, 1H), 5.73 (s, 1H), 4.83 (p,  $J = 6.5$  Hz, 1H), 4.05 – 3.88 (m, 2H), 3.23 (d,  $J = 7.3$  Hz, 1H), 3.12 (ddd,  $J = 15.4, 11.1, 4.8$  Hz, 1H), 1.78 – 1.66 (m, 3H), 1.60 (s, 9H), 1.54 (d,  $J = 6.7$  Hz, 3H), 1.03 (s, 9H).

<sup>13</sup>C NMR (101 MHz, CDCl<sub>3</sub>)  $\delta$  172.76, 171.28, 168.88, 141.13, 129.71, 127.93, 127.15, 123.19, 114.35, 111.16, 100.09, 94.83, 88.95, 84.30, 77.48, 77.16, 76.84, 65.35, 51.41, 40.01, 28.51, 27.47, 26.11, 22.72, 19.79, 18.30.

ESI-HRMS calcd for [C<sub>28</sub>H<sub>36</sub>N<sub>2</sub>O<sub>8</sub>+H<sup>+</sup>]: 529.2544, found 529.2546;

IR (film):  $\tilde{\nu}$  (cm<sup>-1</sup>) 3463, 2978, 2938, 2360, 2339, 1790, 1726, 1603, 1470, 1458, 1405, 1367, 1346, 1259, 1151, 1109, 897, 799, 755, 511, 459.

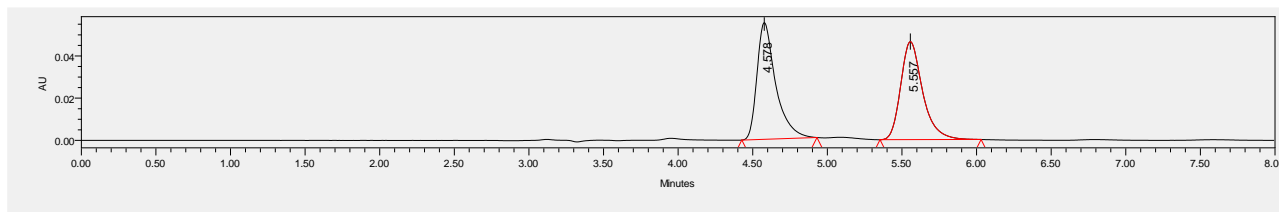

|   | Retention Time | Area   | % Area |
|---|----------------|--------|--------|
| 1 | 4.578          | 487191 | 50.79  |
| 2 | 5.557          | 472028 | 49.21  |

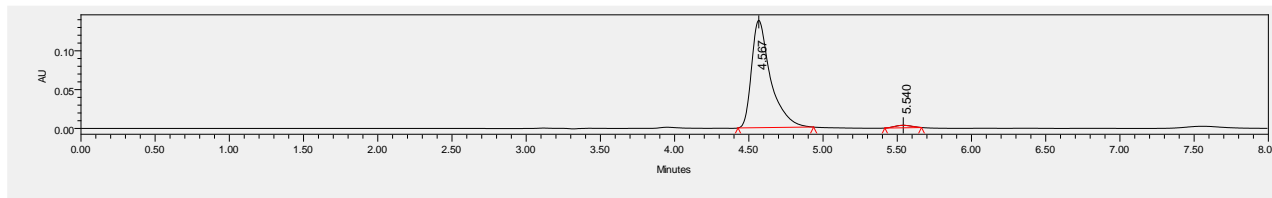

|   | Retention Time | Area    | % Area |
|---|----------------|---------|--------|
| 1 | 4.567          | 1227873 | 98.02  |
| 2 | 5.540          | 24845   | 1.98   |

**Di-tert-butyl (2R,2'S,3S,3'R,9a'R)-2-allyl-2-hydroxy-3'-(S)-2-hydroxypent-4-en-2-yl)-4'-oxo-3',4',6',7',8',9'-hexahydro-2'H-spiro[indoline-3,1'-[3,9a]epoxyquinolizine]-1,2'-dicarboxylate**

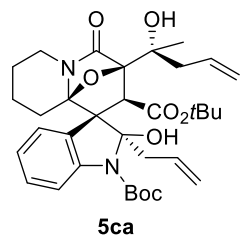

White solid; 71% yield; 94% ee, > 95:5 dr; 43.3 mg;  $[\alpha]^{25}_D = -81.5$  (c 0.20, CH<sub>2</sub>Cl<sub>2</sub>); determined by HPLC analysis [Daicel chiralpak IG, *n*-hexane/*i*-PrOH] = 90/10, 1.0 ml/min,  $\lambda = 254$  nm.  $t_1 = 8.50$  min,  $t_2 = 10.36$  min].

<sup>1</sup>H NMR (400 MHz, CDCl<sub>3</sub>)  $\delta$  7.51 (t,  $J = 7.3$  Hz, 2H), 7.19 (t,  $J = 7.2$  Hz, 1H), 6.93 (t,  $J = 7.6$  Hz, 1H), 6.07 – 5.96 (m, 2H), 5.85 (m, 1H), 5.15 (m, 2H), 5.09 (m, 2H), 4.64 (s, 1H), 3.79 (s, 1H), 3.64 (dt,  $J = 13.0, 6.7$  Hz, 1H), 3.29 – 3.19 (m, 2H), 3.07 (dd,  $J = 16.1, 6.6$  Hz, 1H), 2.84 (dd,  $J = 13.8, 7.7$  Hz, 1H), 2.34 (dd,  $J = 13.8, 6.8$  Hz, 1H), 1.97 – 1.87 (m, 2H), 1.72 – 1.64 (m, 4H), 1.61 (s, 9H), 1.39 (s, 3H), 0.97 (s, 9H).

$^{13}\text{C}$  NMR (101 MHz,  $\text{CDCl}_3$ )  $\delta$  173.29, 171.77, 153.56, 142.37, 133.76, 133.24, 129.34, 128.34, 127.60, 122.83, 118.62, 117.96, 113.66, 96.80, 95.80, 90.56, 83.64, 83.49, 77.48, 77.16, 76.84, 71.83, 71.63, 55.23, 43.05, 42.19, 38.30, 28.59, 27.61, 27.15, 23.61, 21.72, 18.80.

ESI-HRMS calcd for  $[\text{C}_{34}\text{H}_{46}\text{N}_2\text{O}_8+\text{H}^+]$ : 611.3327, found 611.3330;

IR (film):  $\tilde{\nu}$  ( $\text{cm}^{-1}$ ) 3405.86, 3054.57, 2984.89, 2306.18, 1713.3, 1645.31, 1594.92, 1482.8, 1371.41, 1345.61, 1265.57, 1156.34, 1080.16, 919.58, 896.19, 841.22, 739.95, 705.72.

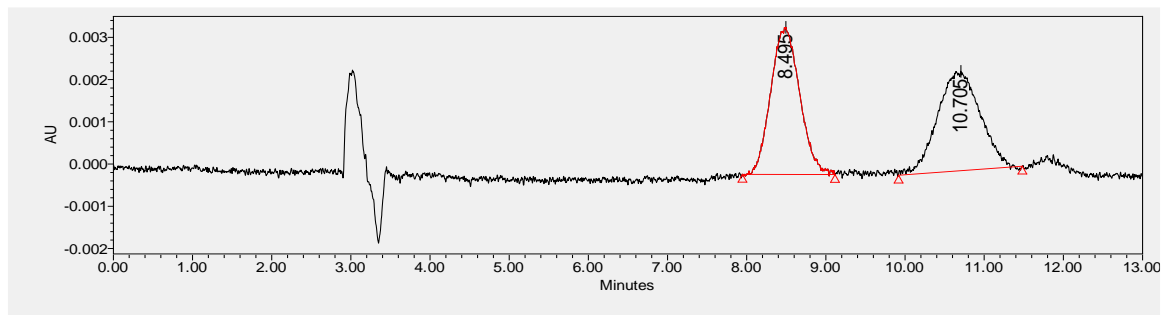

|   | Retention Time | Area  | % Area |
|---|----------------|-------|--------|
| 1 | 8.495          | 88308 | 49.97  |
| 2 | 10.705         | 88412 | 50.03  |

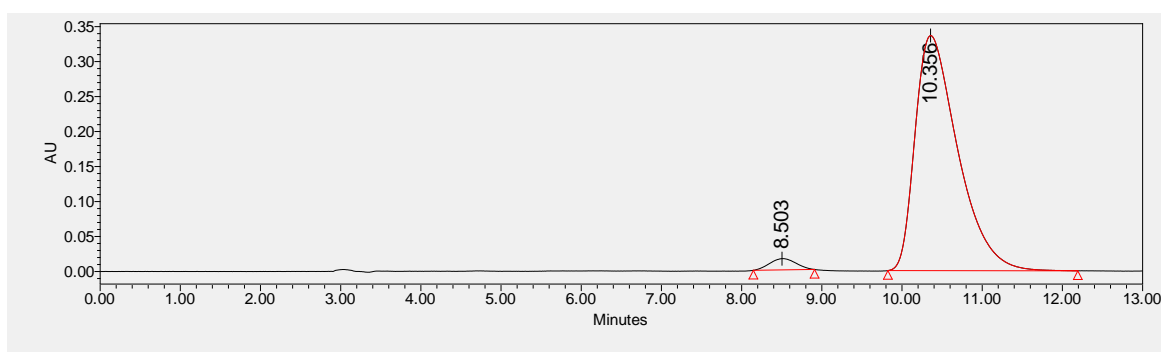

|   | Retention Time | Area     | % Area |
|---|----------------|----------|--------|
| 1 | 8.503          | 360942   | 2.82   |
| 2 | 10.356         | 12454570 | 97.18  |

***Tert*-butyl (2'*S*,3*R*,3'*R*,9*a*'*R*)-3'-acetyl-2,4'-dioxo-3',4',6',7',8',9'-hexahydro-2'*H*-spiro[indoline-3,1'-[3,9*a*]epoxyquinolizine]-2'-carboxylate**

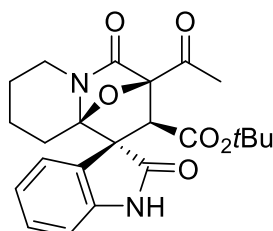

**6ca**

White solid; 70% yield, 95% ee, > 95:5 dr; 29.8 mg;  $[\alpha]_D^{26} = -28.3$  ( $c$  0.060,  $\text{CH}_2\text{Cl}_2$ ); determined by HPLC analysis [Daicel chiralpak IA, *n*-hexane/*i*-PrOH = 70/30, 1.0 mL/min,  $\lambda = 254$  nm,  $t_1 = 5.21$  min,  $t_2 = 7.70$  min].

$^1\text{H}$  NMR (400 MHz,  $\text{CDCl}_3$ )  $\delta$  8.15 (s, 1H), 7.32 (d,  $J = 7.6$  Hz, 1H), 7.29 (td,  $J = 7.8, 1.3$  Hz, 1H), 7.03 (td,  $J = 7.7, 1.0$  Hz, 1H), 6.94 (d,  $J = 7.7$  Hz, 1H), 3.86 (s, 2H), 3.36 (td,  $J = 13.4, 12.8, 4.6$  Hz, 1H), 2.48 (s, 3H), 1.84 – 1.67 (m, 4H), 1.51 (td,  $J = 16.7, 15.7, 5.1$  Hz, 1H), 1.25 – 1.15 (m, 1H), 0.95 (s, 9H).

$^{13}\text{C}$  NMR (101 MHz,  $\text{CDCl}_3$ )  $\delta$  199.20, 175.56, 168.56, 166.82, 141.19, 129.70, 127.24, 126.62, 123.28, 109.81, 96.58, 90.69, 82.91, 77.48, 77.16, 76.84, 62.72, 59.34, 41.10, 28.14, 27.52, 27.08, 22.86, 20.42.

ESI-HRMS calcd for  $[\text{C}_{23}\text{H}_{26}\text{N}_2\text{O}_6+\text{H}^+]$ : 427.1864, found 427.1862;

IR (film):  $\tilde{\nu}$  ( $\text{cm}^{-1}$ ) 3261, 2981, 2363, 2330, 1732, 1619, 1471, 1406, 1363, 1268, 1154, 863, 755, 454.



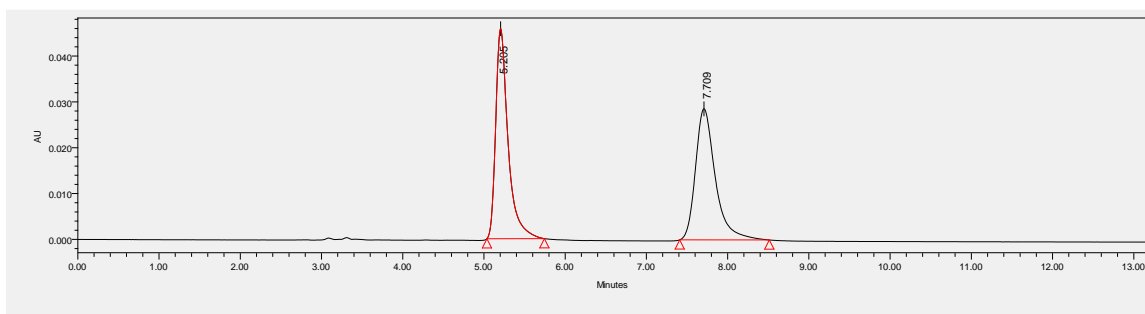

|   | Retention Time | Area   | % Area |
|---|----------------|--------|--------|
| 1 | 5.205          | 484248 | 49.97  |
| 2 | 7.709          | 484760 | 50.03  |

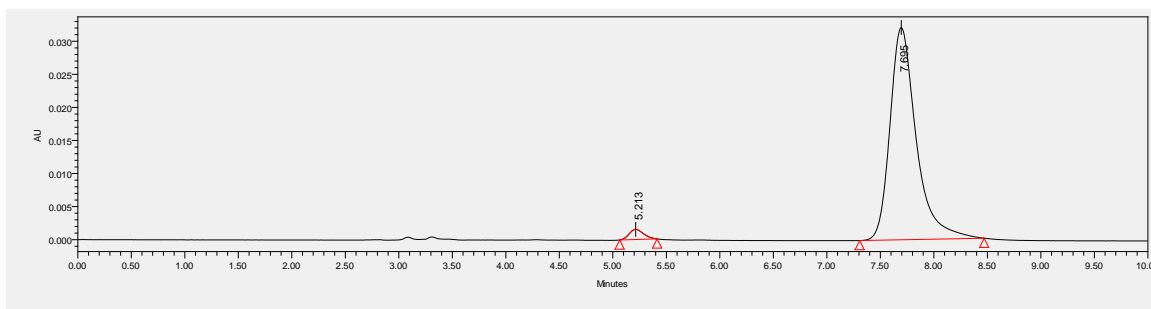

|   | Retention Time | Area   | % Area |
|---|----------------|--------|--------|
| 1 | 5.213          | 14296  | 2.55   |
| 2 | 7.695          | 547066 | 97.45  |

## 12. Reference

- (1) Wen, Y. H.; Huang, X.; Huang, J. L.; Xiong, Y.; Qin, B.; Feng, X. M. Asymmetric Cyanosilylation of Aldehydes Catalyzed by Novel Organocatalysts. *Synlett* **2005**, 2445-2448.
- (2) Cao, Y. M.; Jiang, X. X.; Liu, L. P.; Shen, F. F.; Zhang, F.T.; Wang, R. Enantioselective Michael/Cyclization Reaction Sequence: Scaffold-Inspired Synthesis of Spirooxindoles with Multiple Stereocenters. *Angew. Chem. Int. Ed.* **2011**, *50*, 9124-9127.
- (3) (a) Doyle, M. P.; Dorow, R. L.; Terpstra, J. W.; Rodenhouse, R. A. Synthesis and Catalytic Reactions of Chiral *N*-(Diazoacetyl)oxazolidones. *J. Org. Chem.* **1985**, *50*, 1663-1666. (b) Padwa, A.; Hertzog, D. L.; Chinn, R. L. Synthesis of Aza Substituted Polycycles via Rhodium (II) Carboxylate induced cyclization of Diazoimides. *Tetrahedron Lett.* **1989**, *30*, 4077-4080. (c) Doyle, M. P.; Pieters, R. J.; Taunton, J.; Padwa, A.; Hertzog, D. L.; Precedo, L. Synthesis of Nitrogen-containing Polycycles via Rhodium(II)-induced Cyclization-cycloaddition and Insertion Reactions of *N*-(Diazoacetoacetyl)amides. Conformational Control of Reaction Selectivity. *J. Org. Chem.* **1991**, *56*, 820-829. (d) Padwa, A.; Hertzog, D. L.; Nadler, W. R.; Osterhout, M. H.; Price, A. T. *J. Org. Chem.* **1994**, *59*, 1418-1427; (d) Savinov, S. N.; Austin, D. J. Modular Evolution of a Chiral Auxiliary for the 1,3-Dipolar Cycloaddition of Isomülchnones with Vinyl Ethers *Org. Lett.* **2002**, *4*, 1415-1418. (e) Xu, C. R.; Wang, K. X.; Li, D. W.; Lin, L. L.; Feng, X. M. Asymmetric Synthesis of Oxa-Bridged Oxazocines through a Catalytic Rh<sup>II</sup>/Zn<sup>II</sup> Relay [4+3] Cycloaddition Reaction. *Angew. Chem. Int. Ed.* **2019**, *58*, 1-6.

### 13. Copies of NMR-Spectra of Products

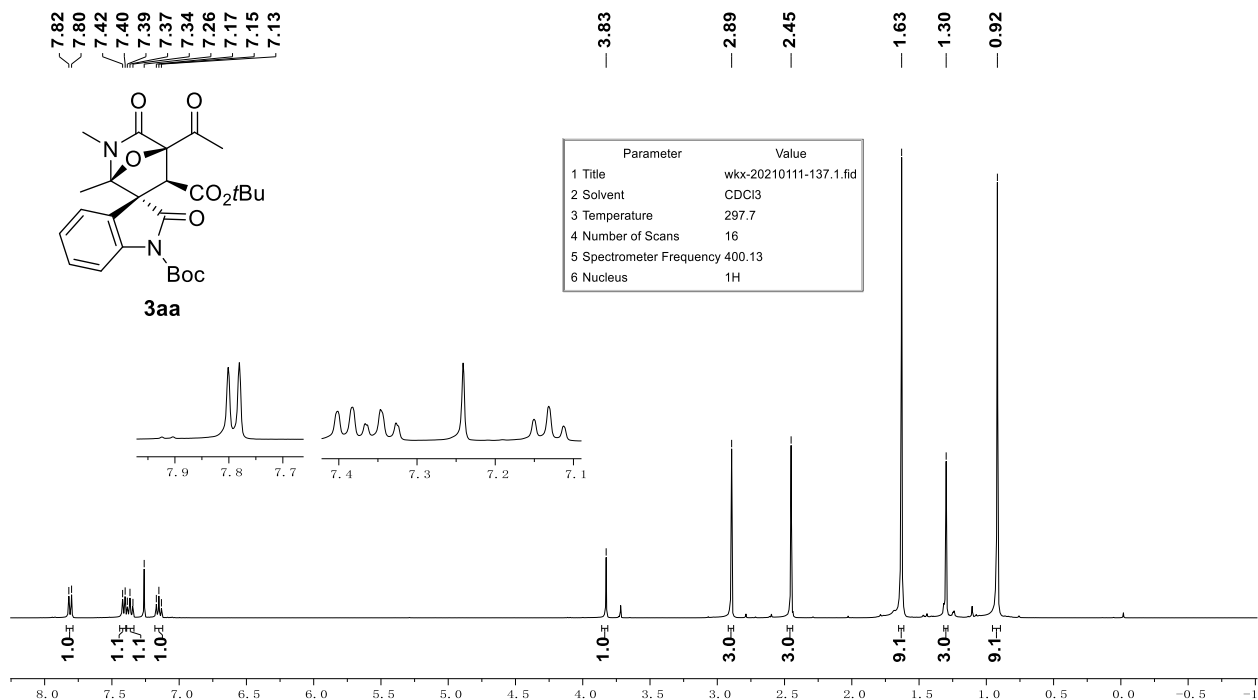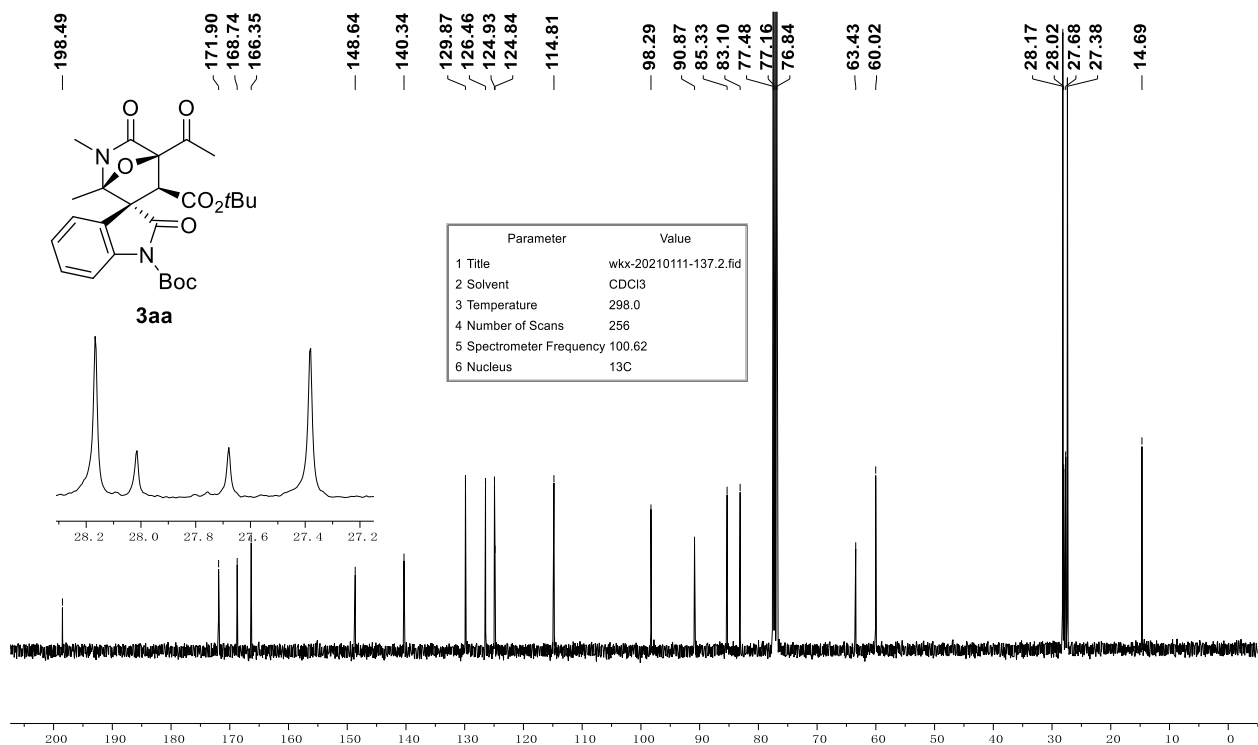

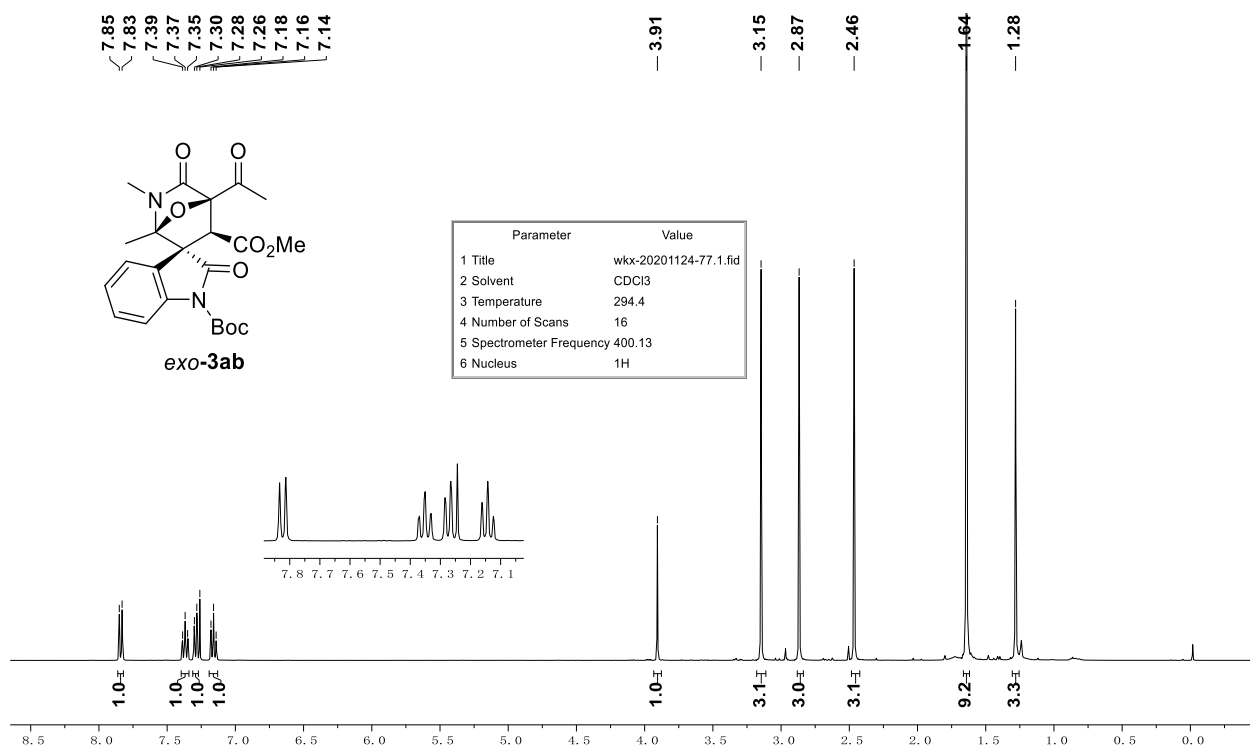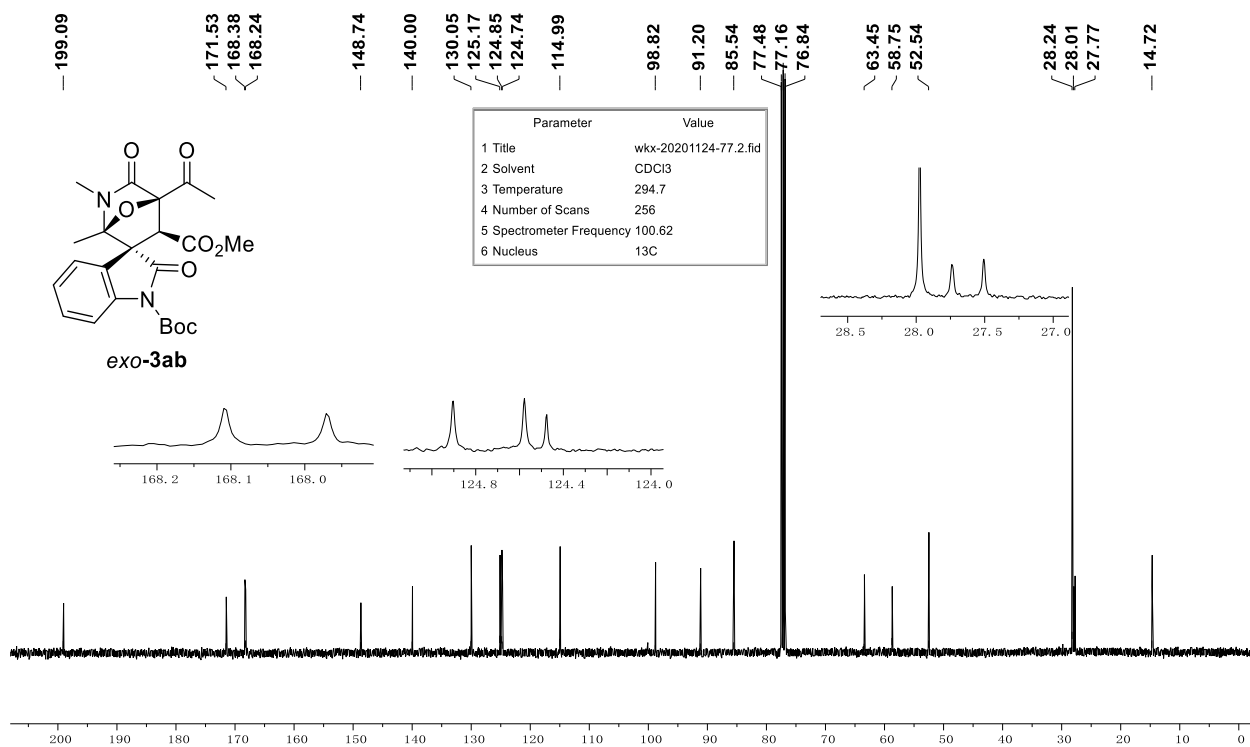

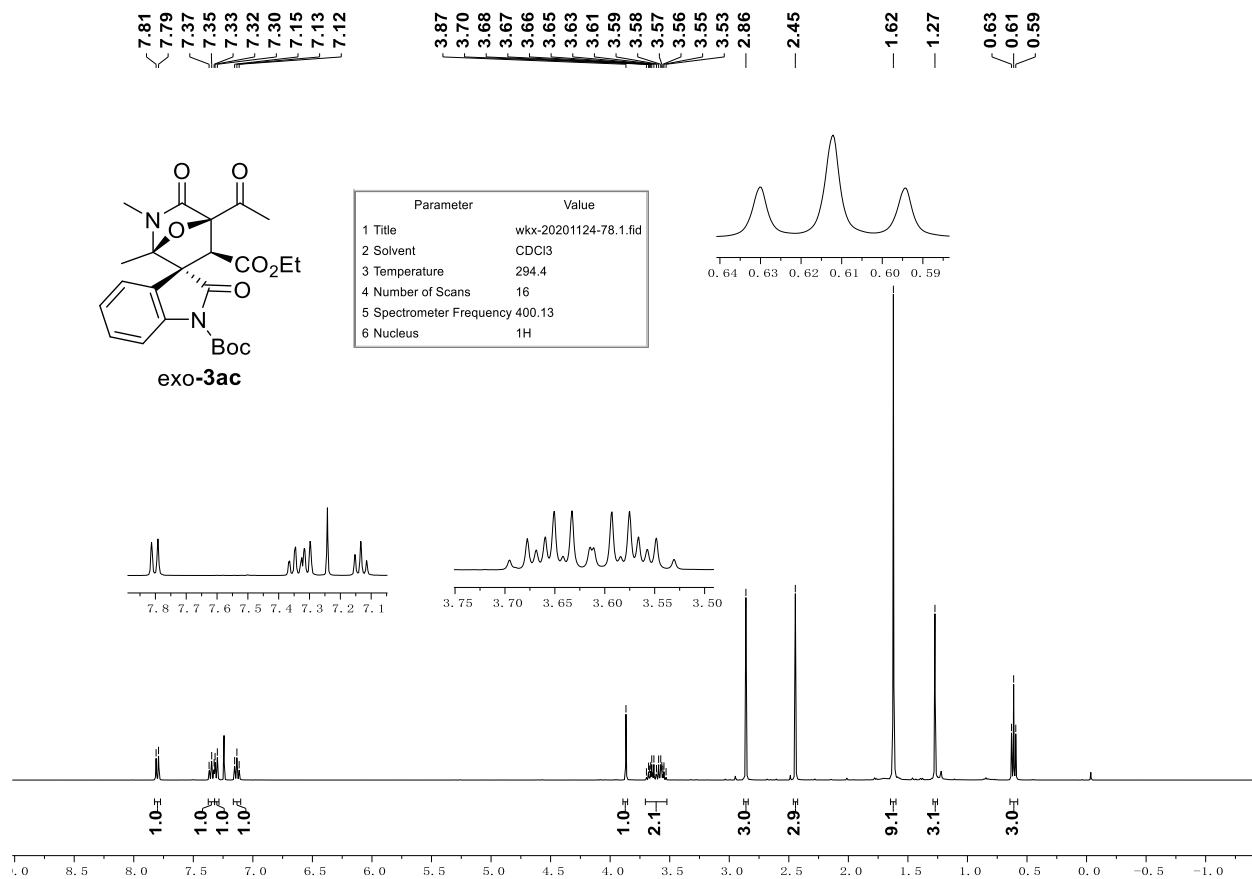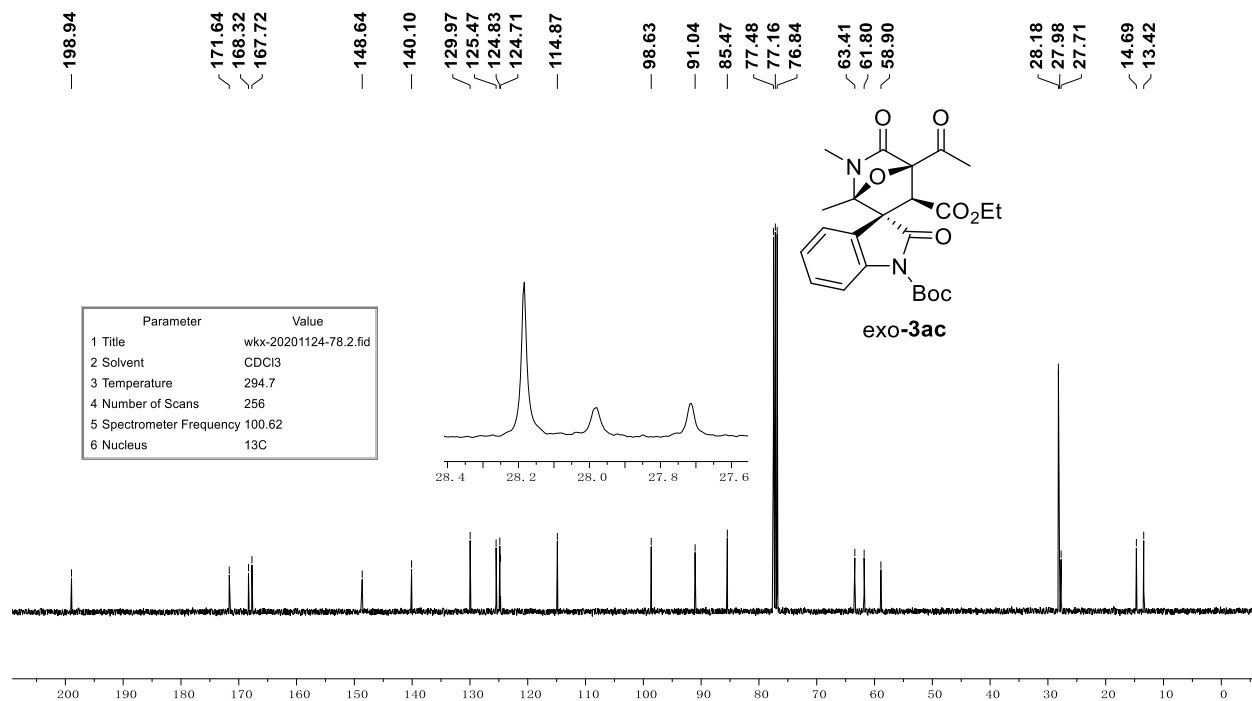

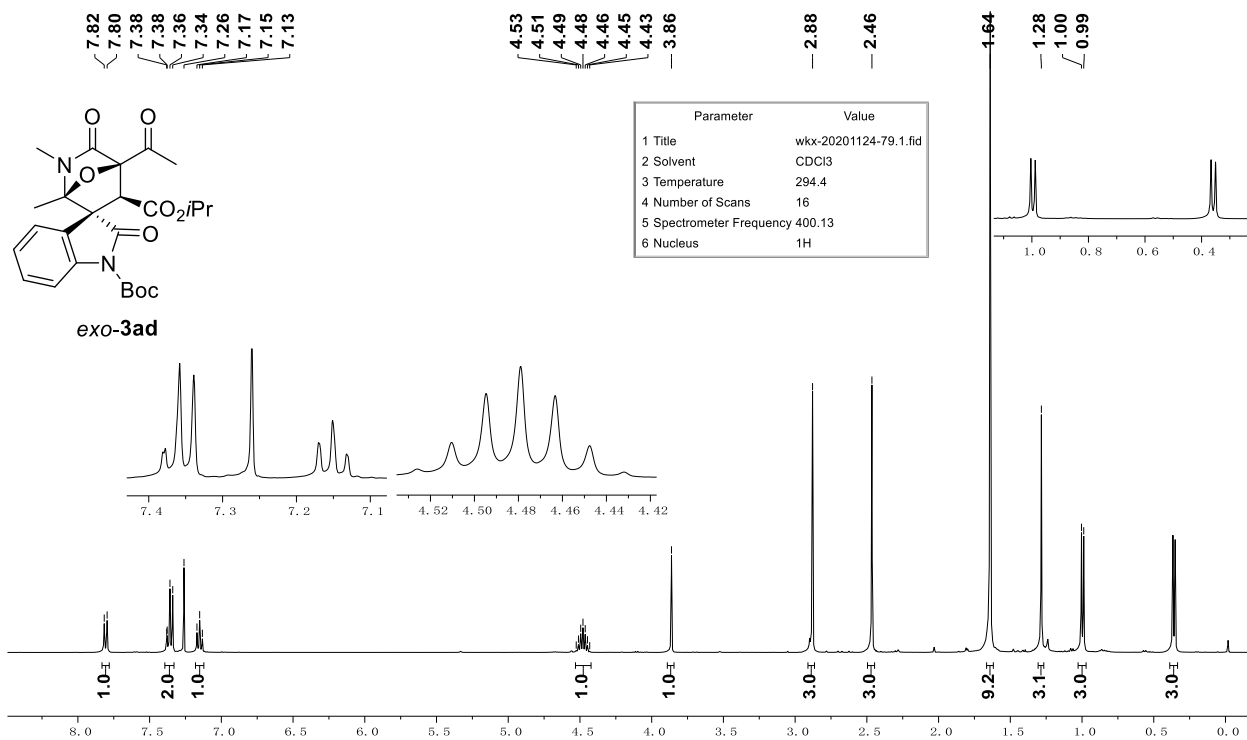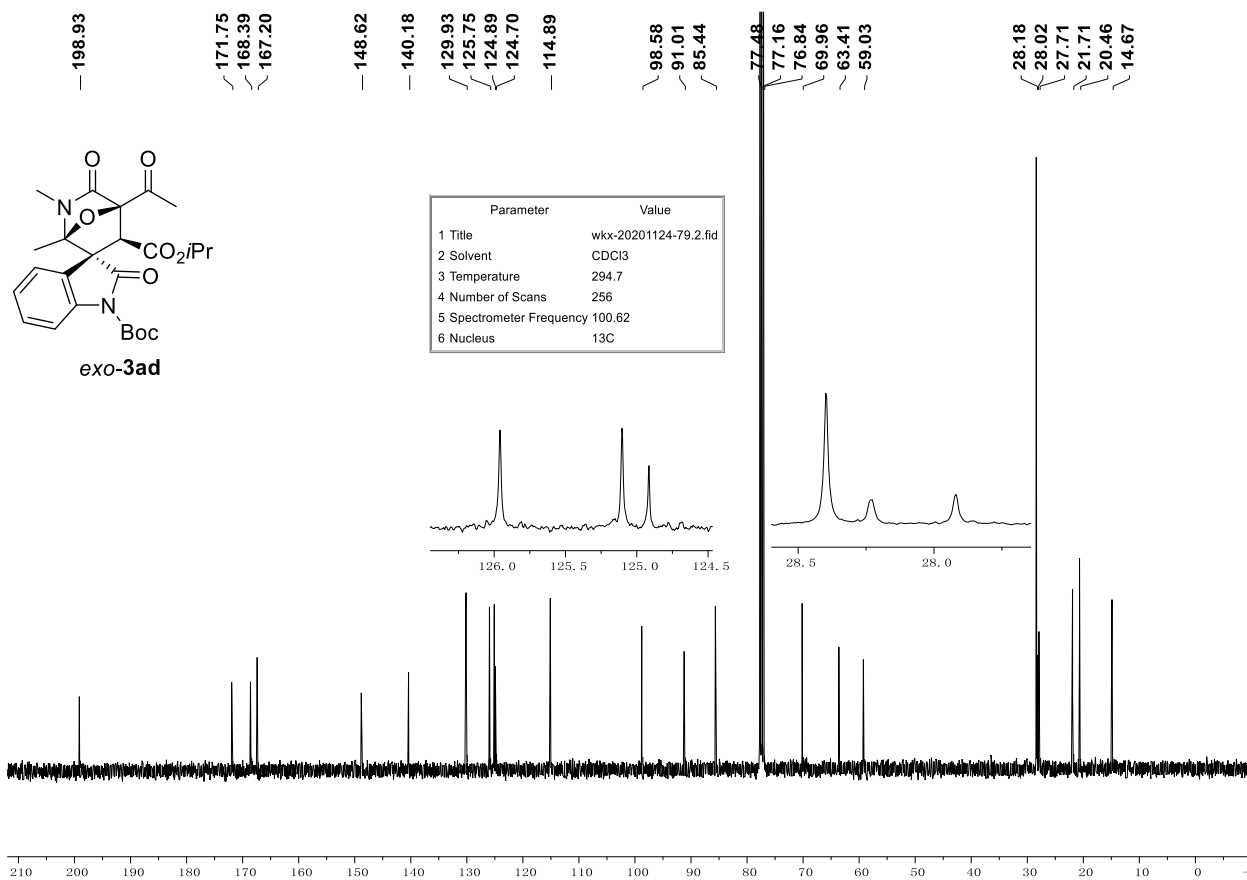

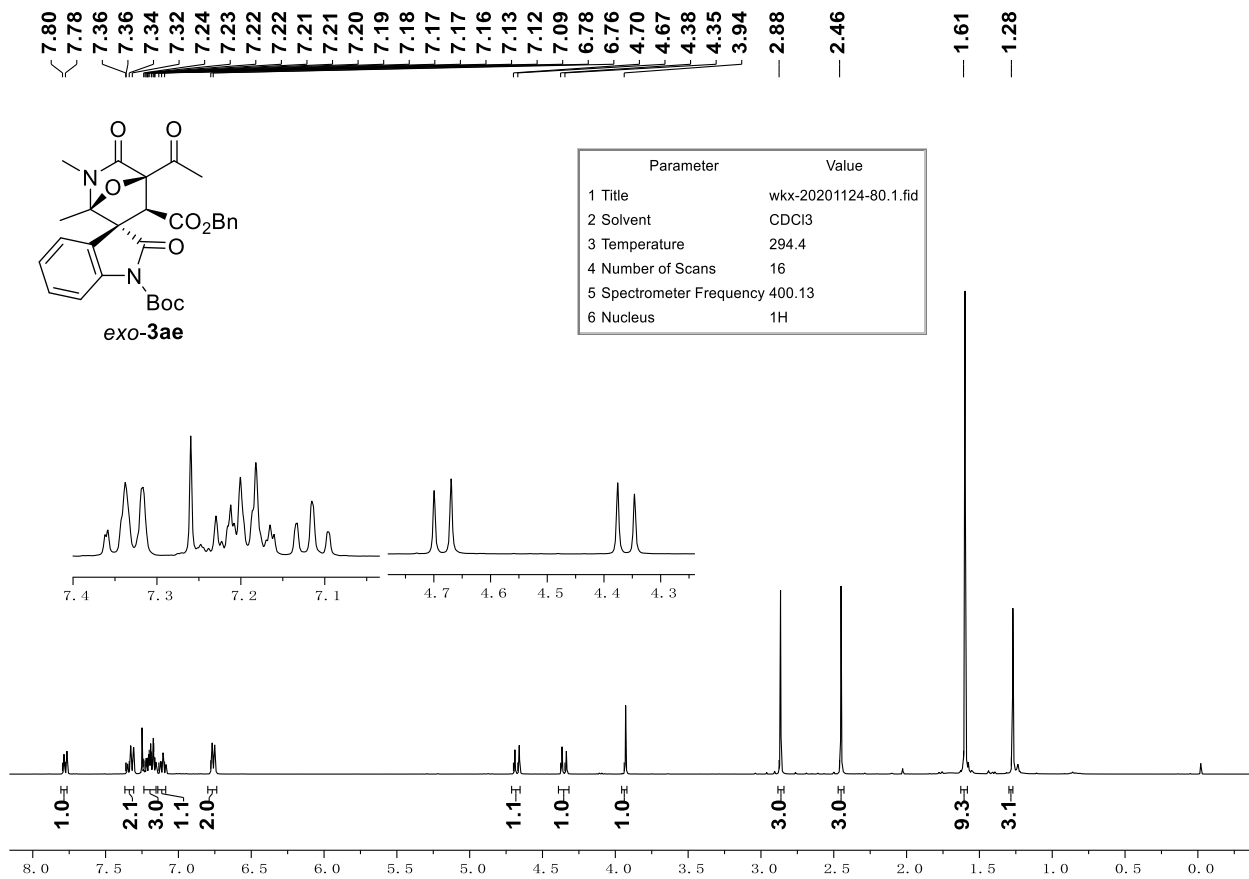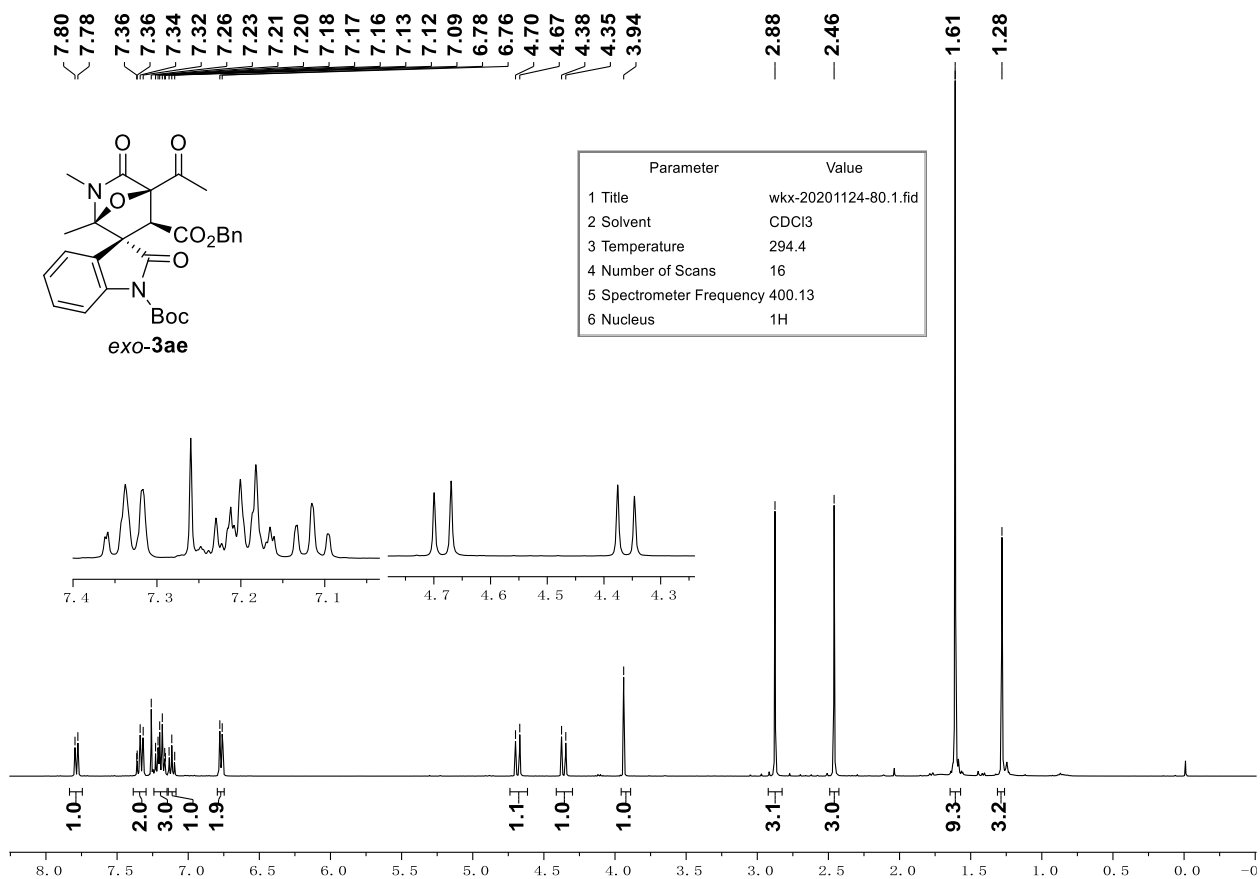

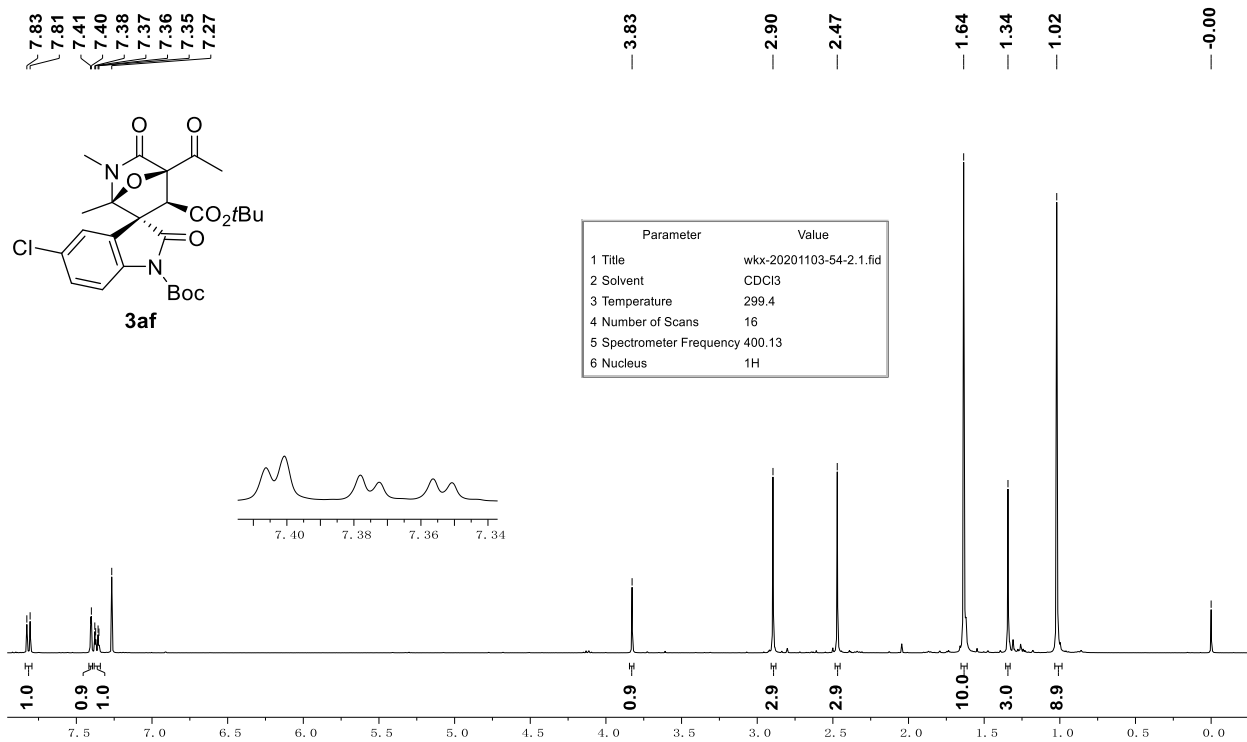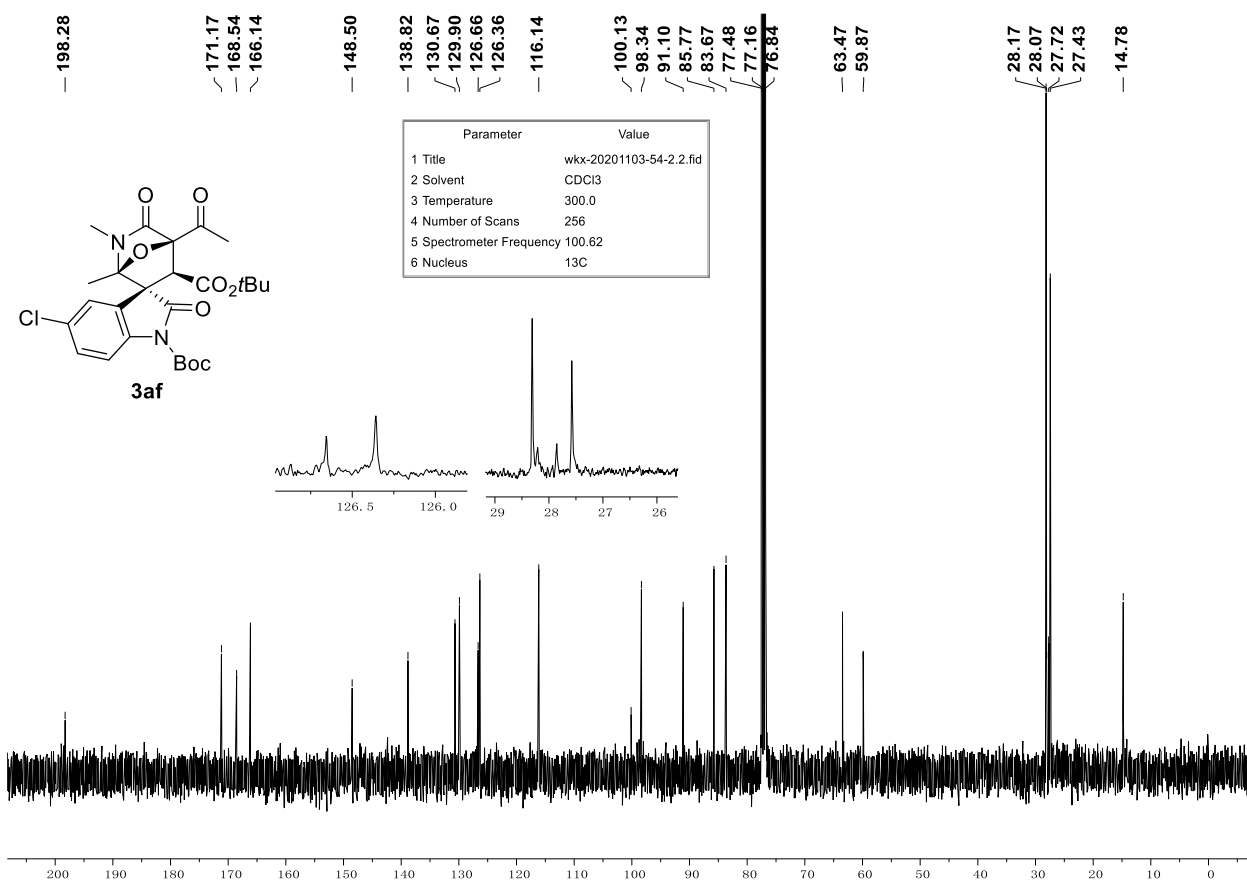



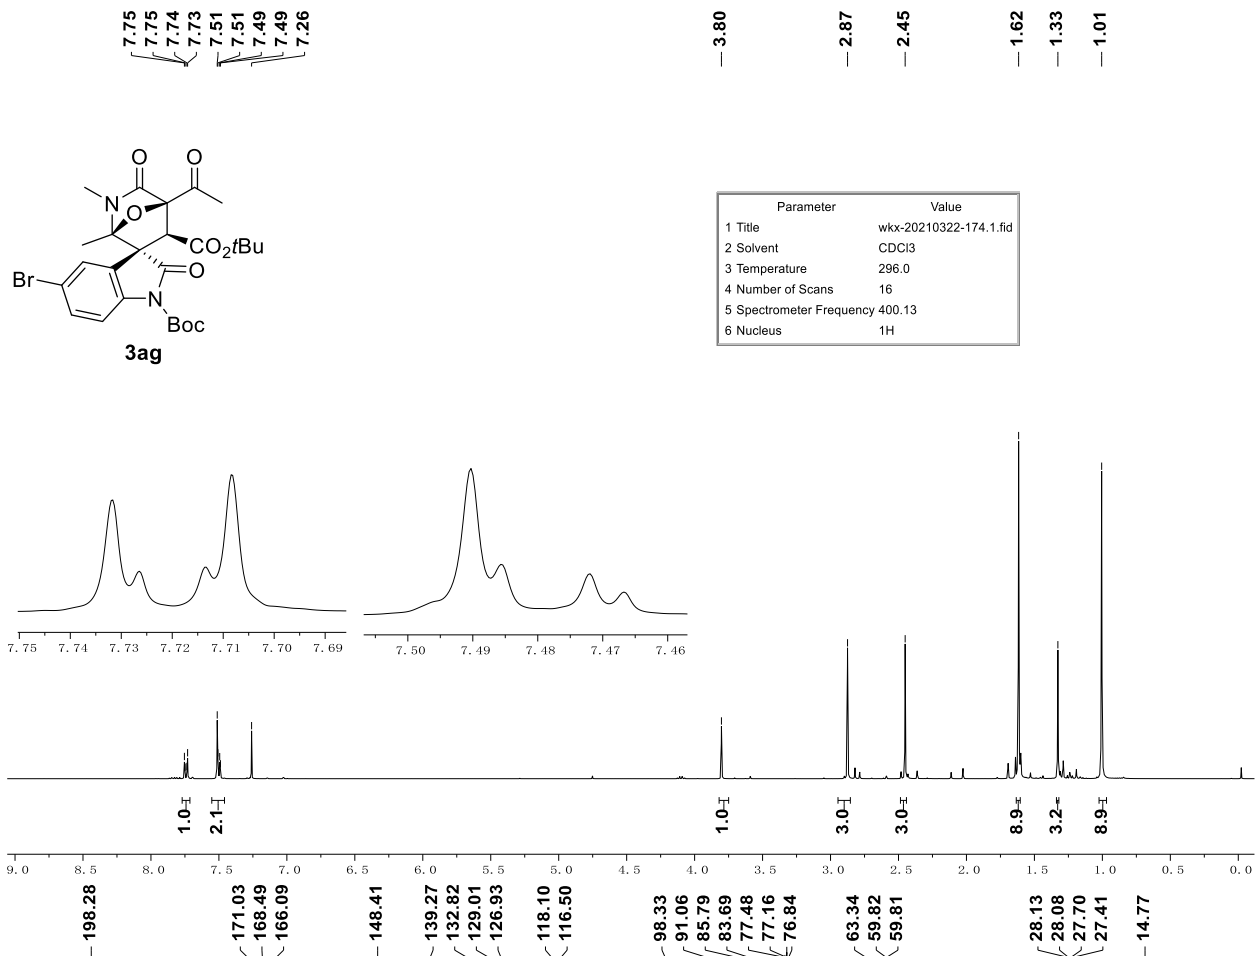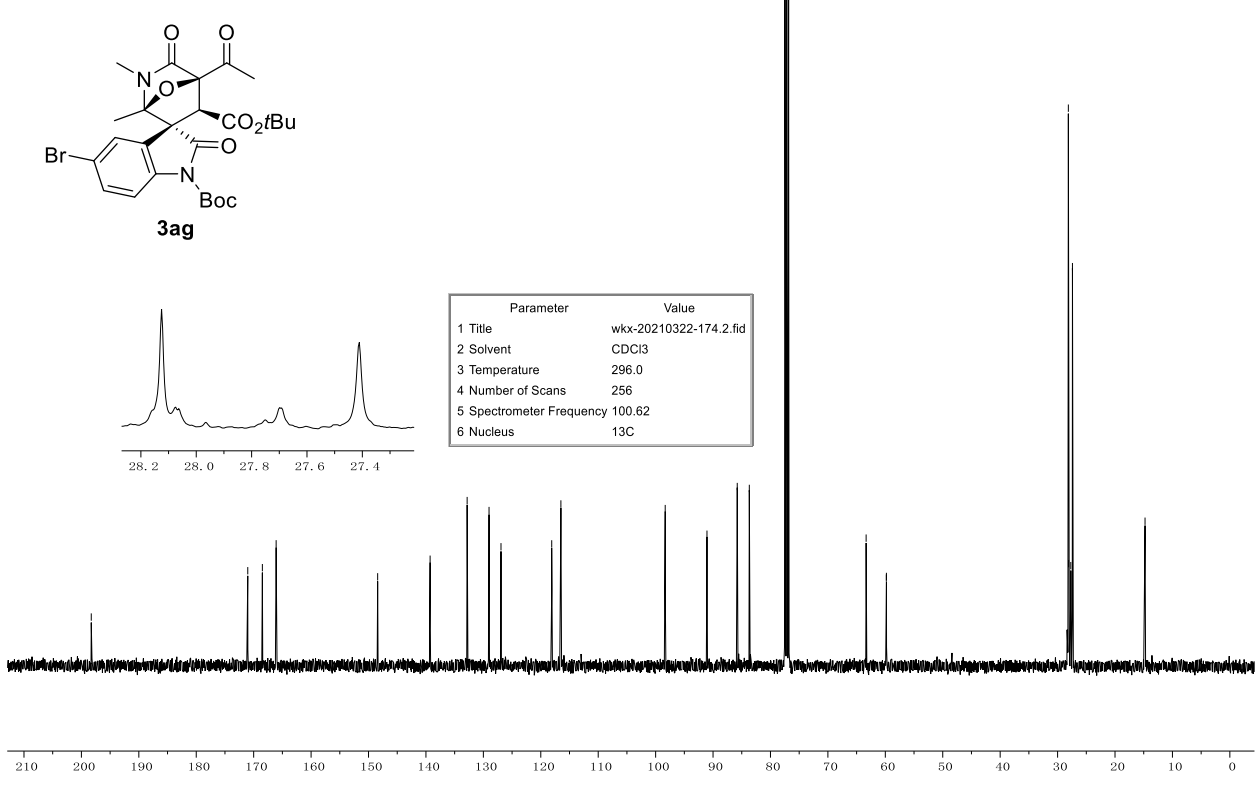

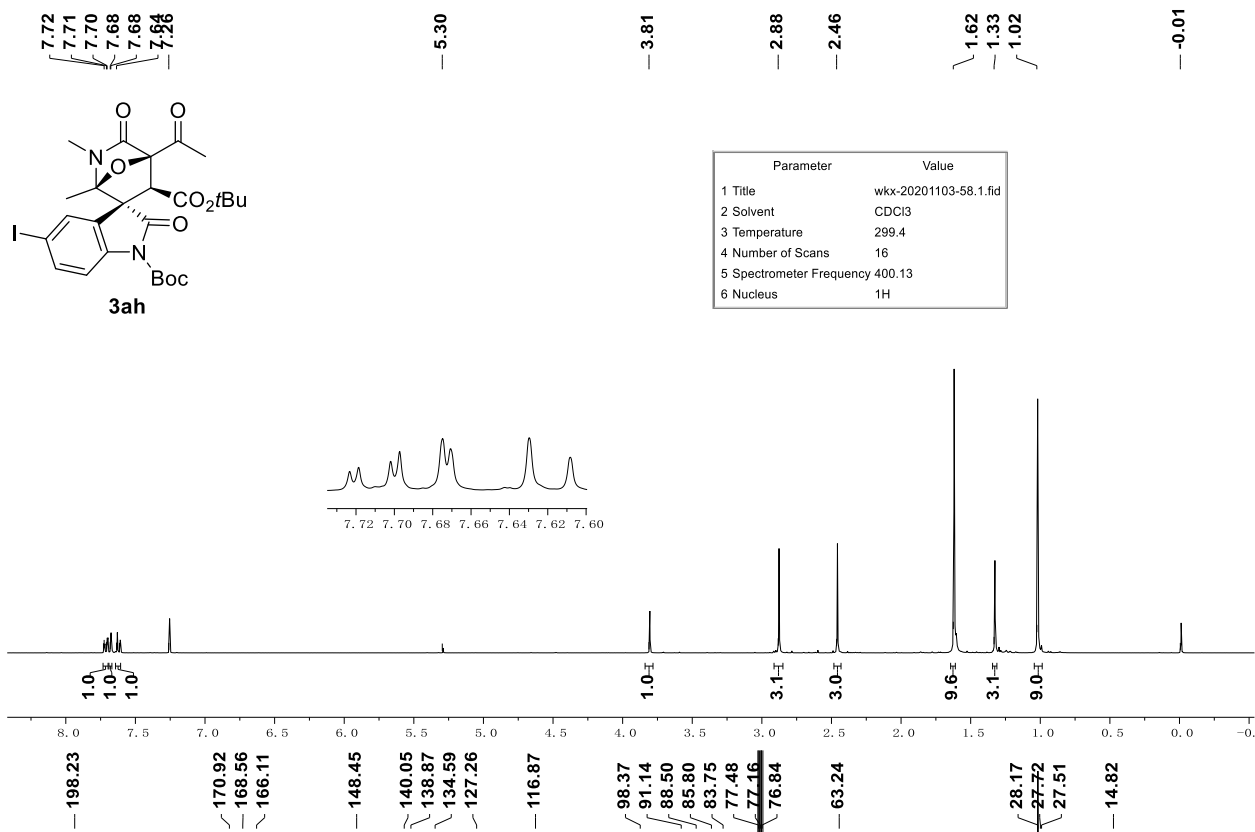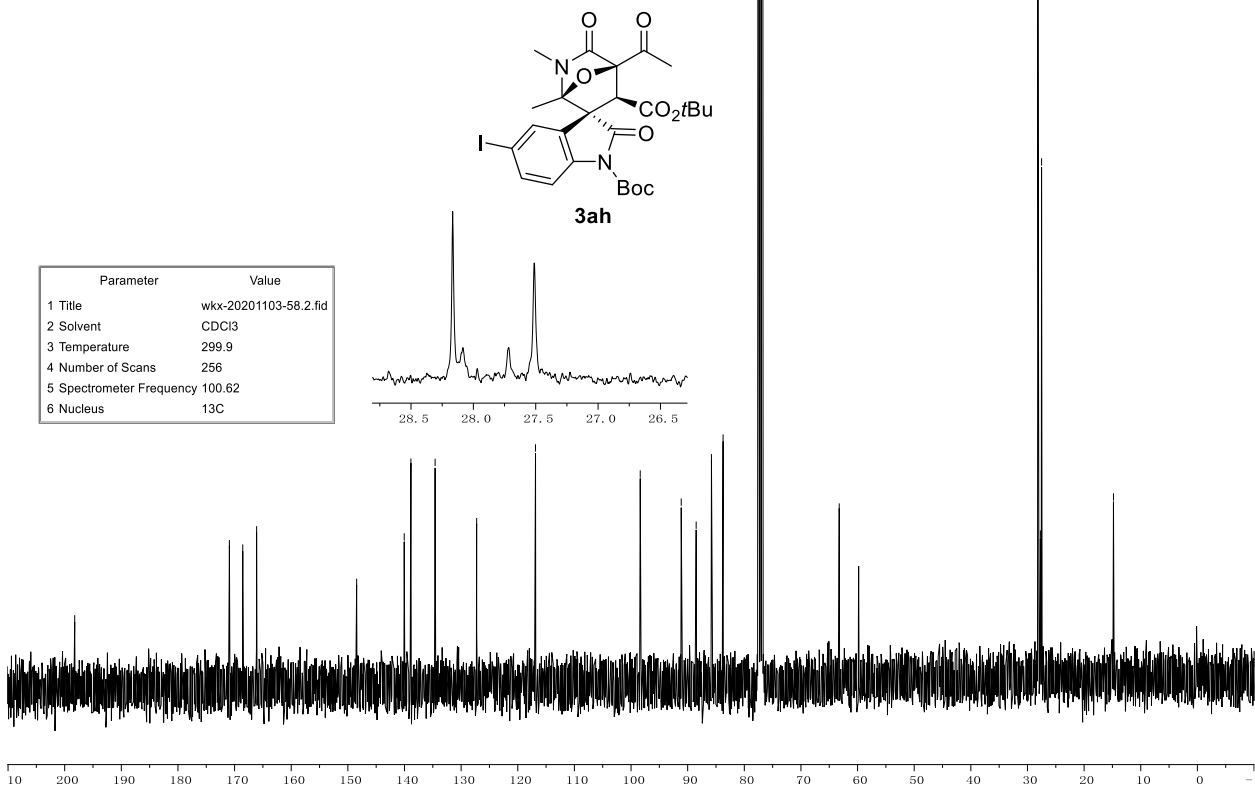

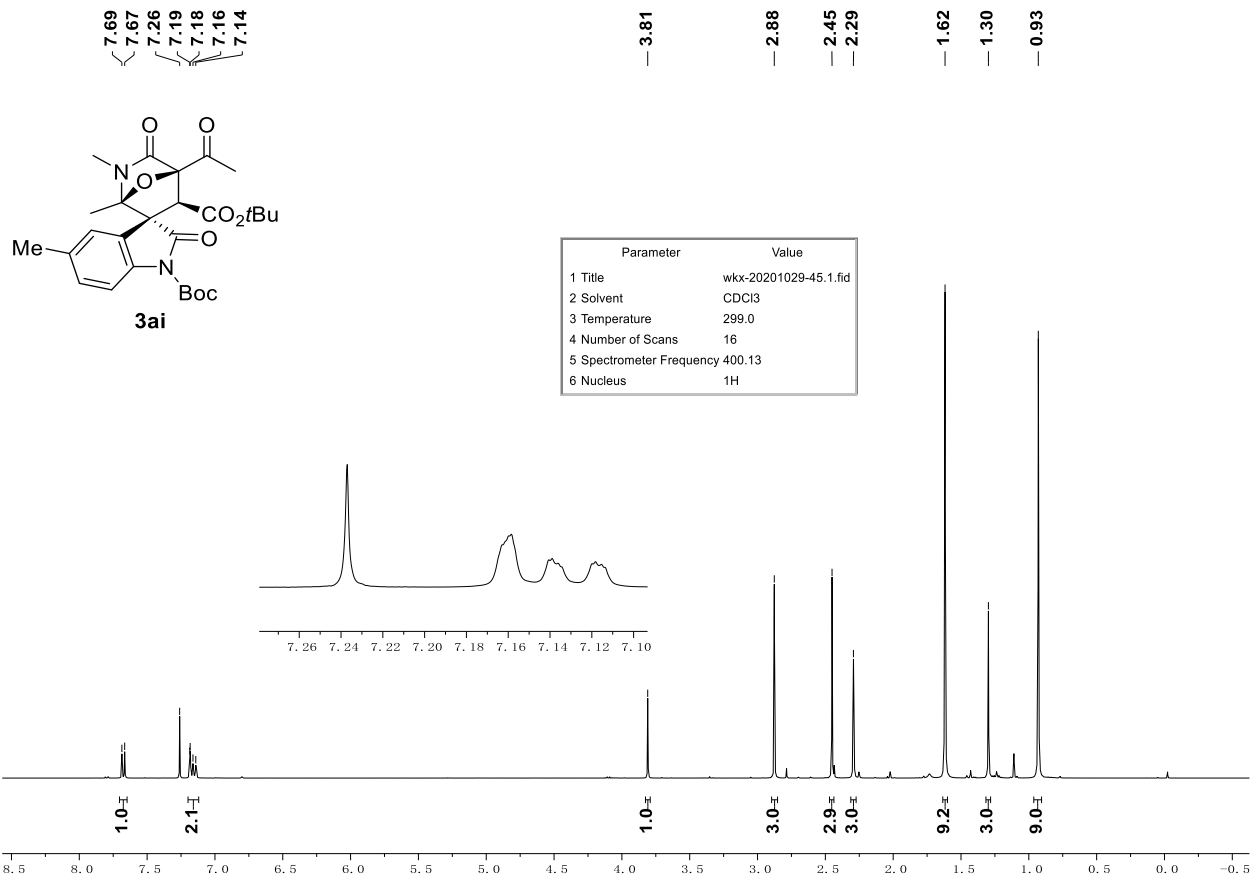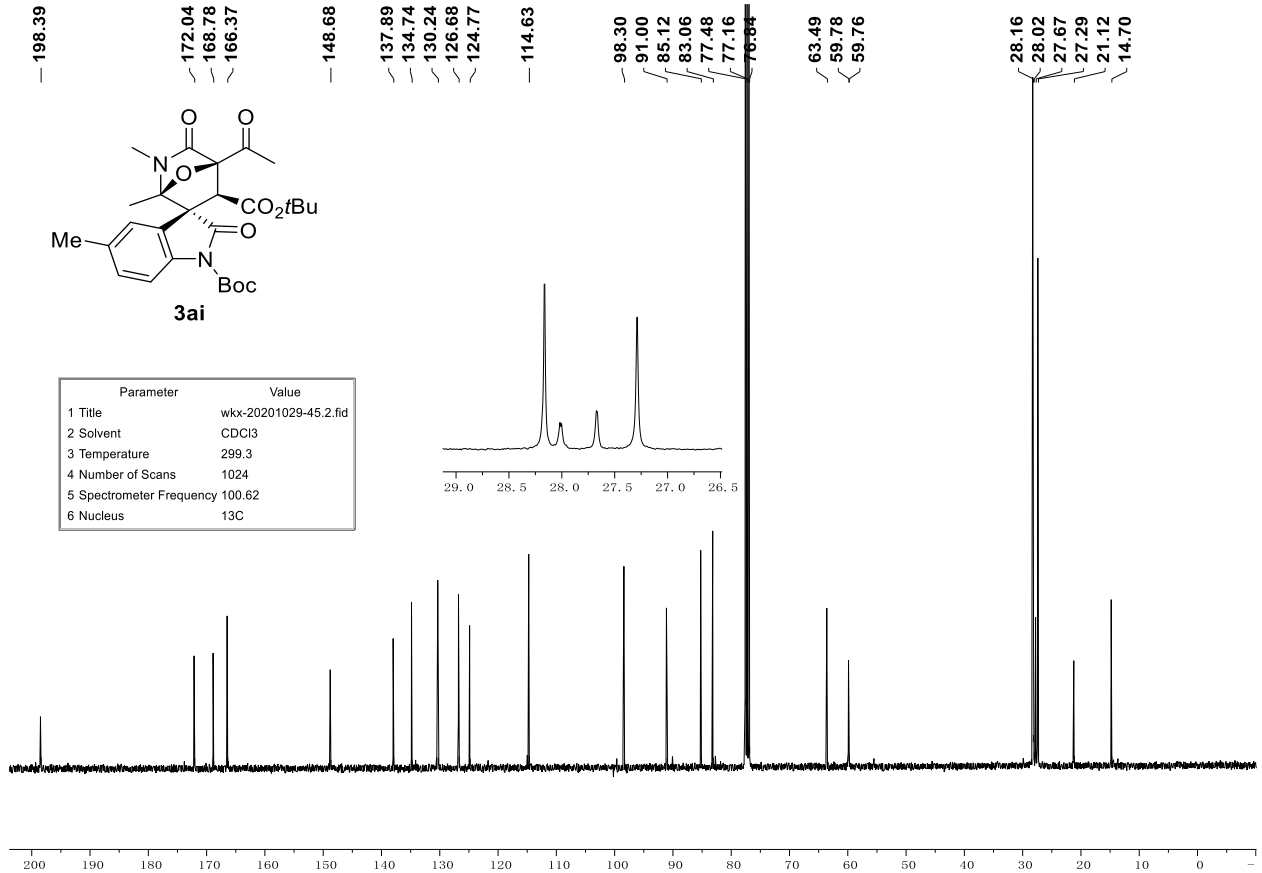

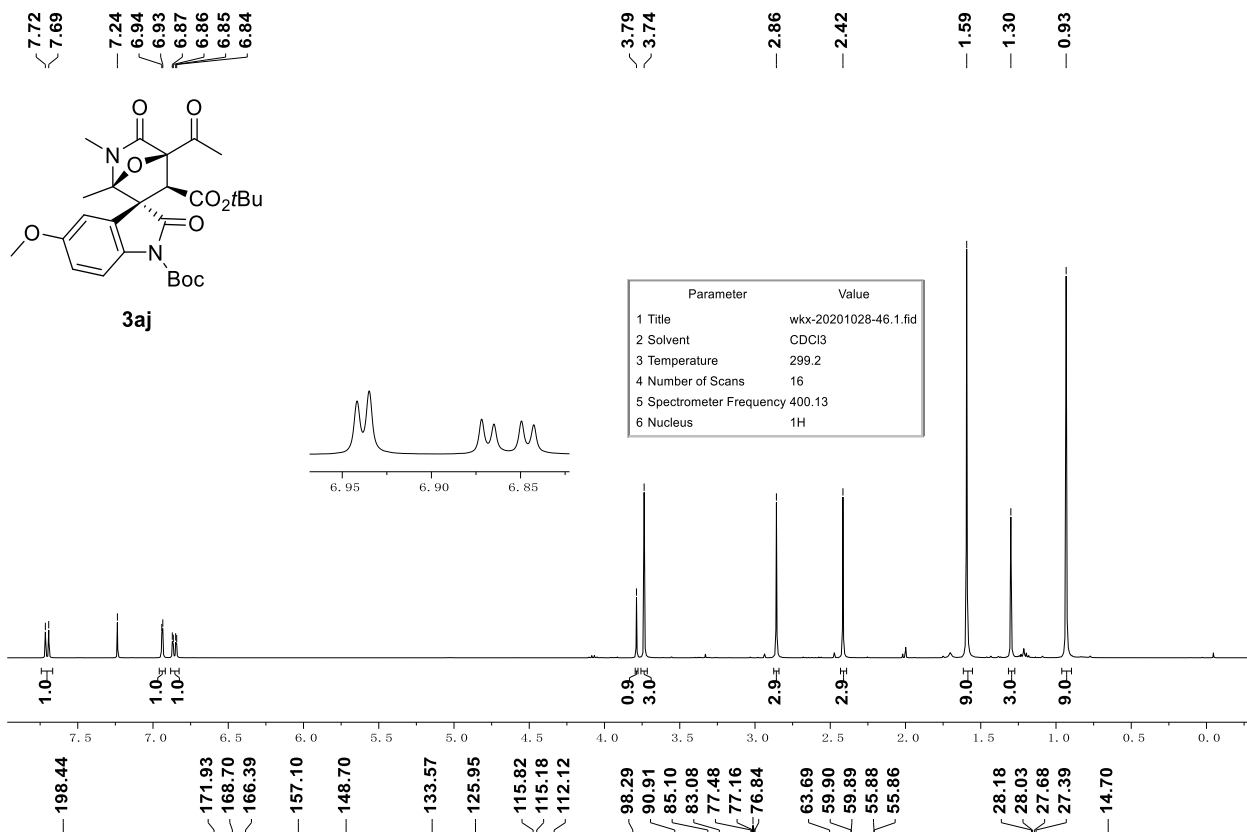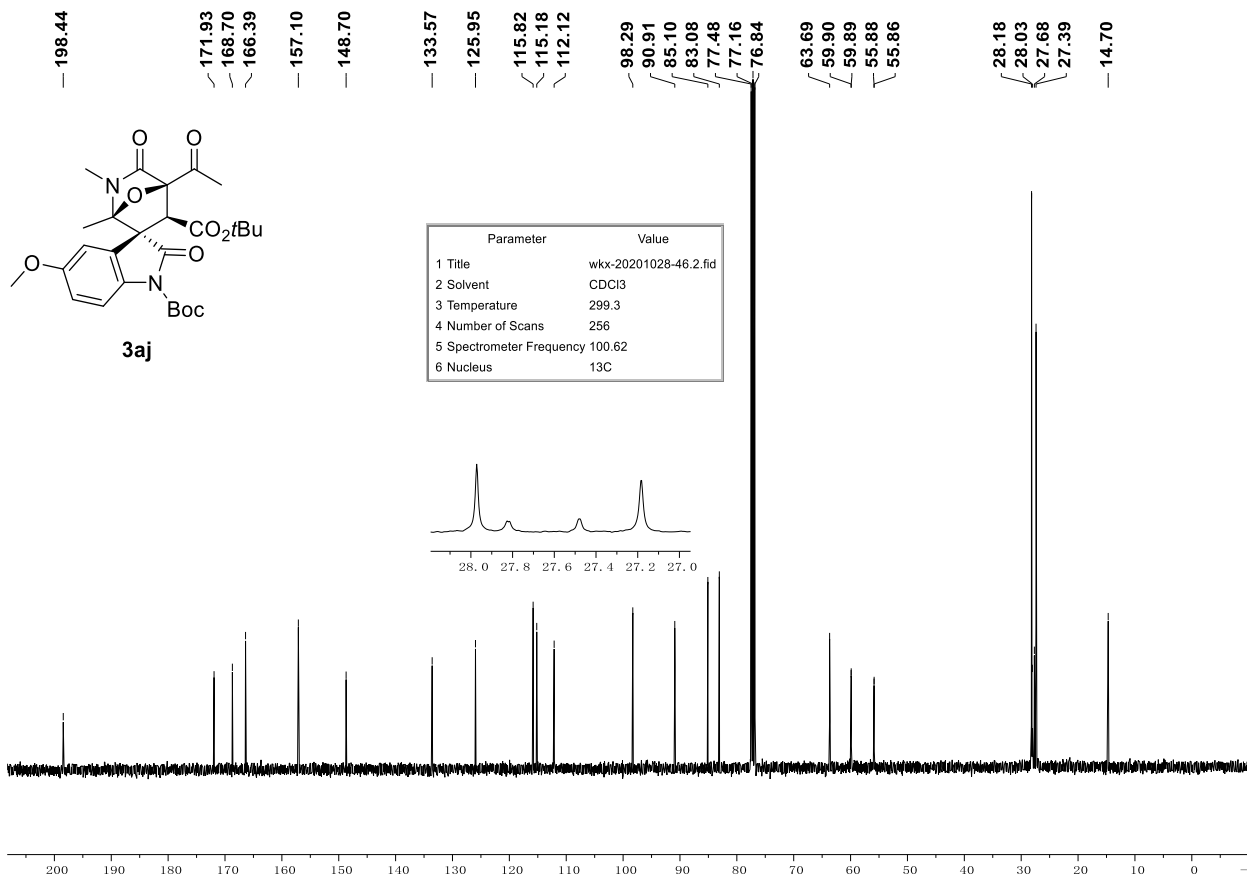

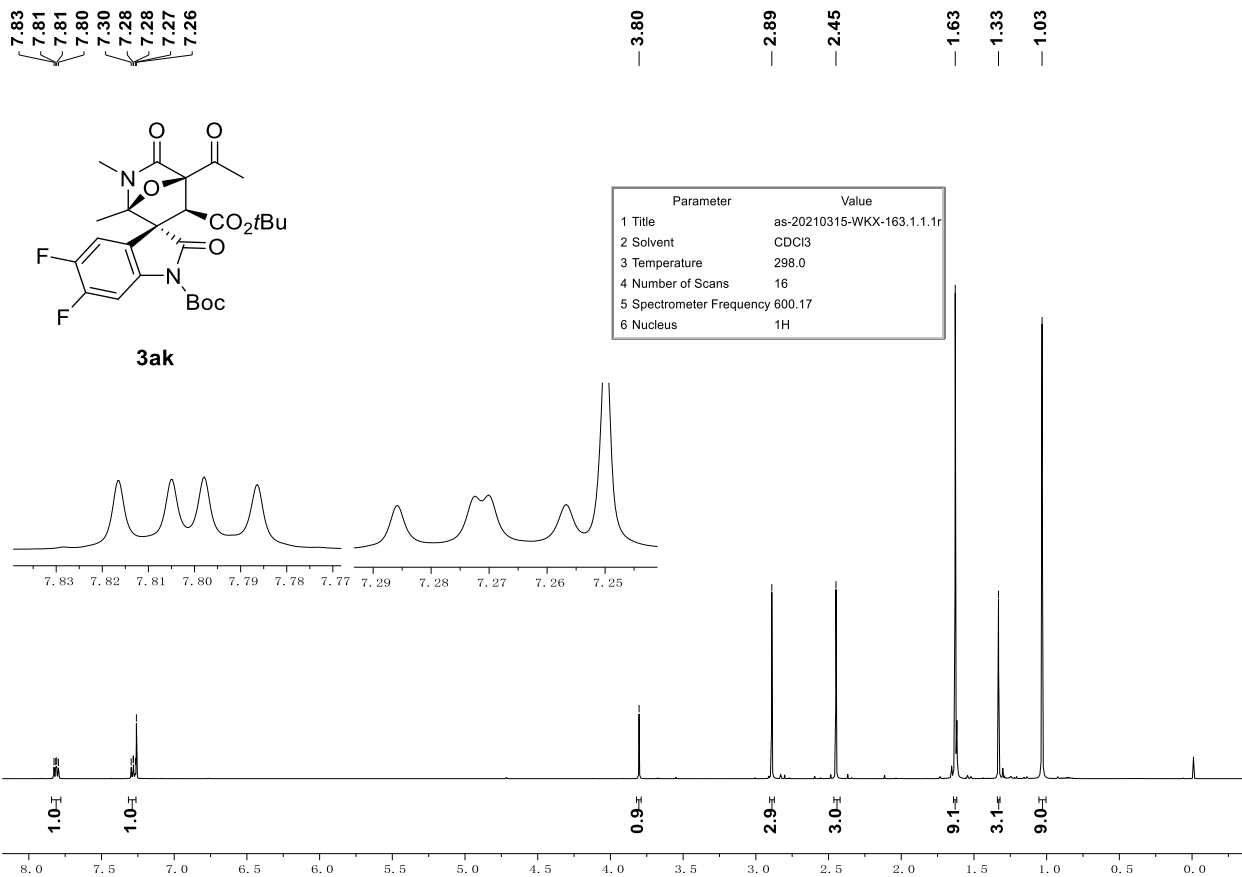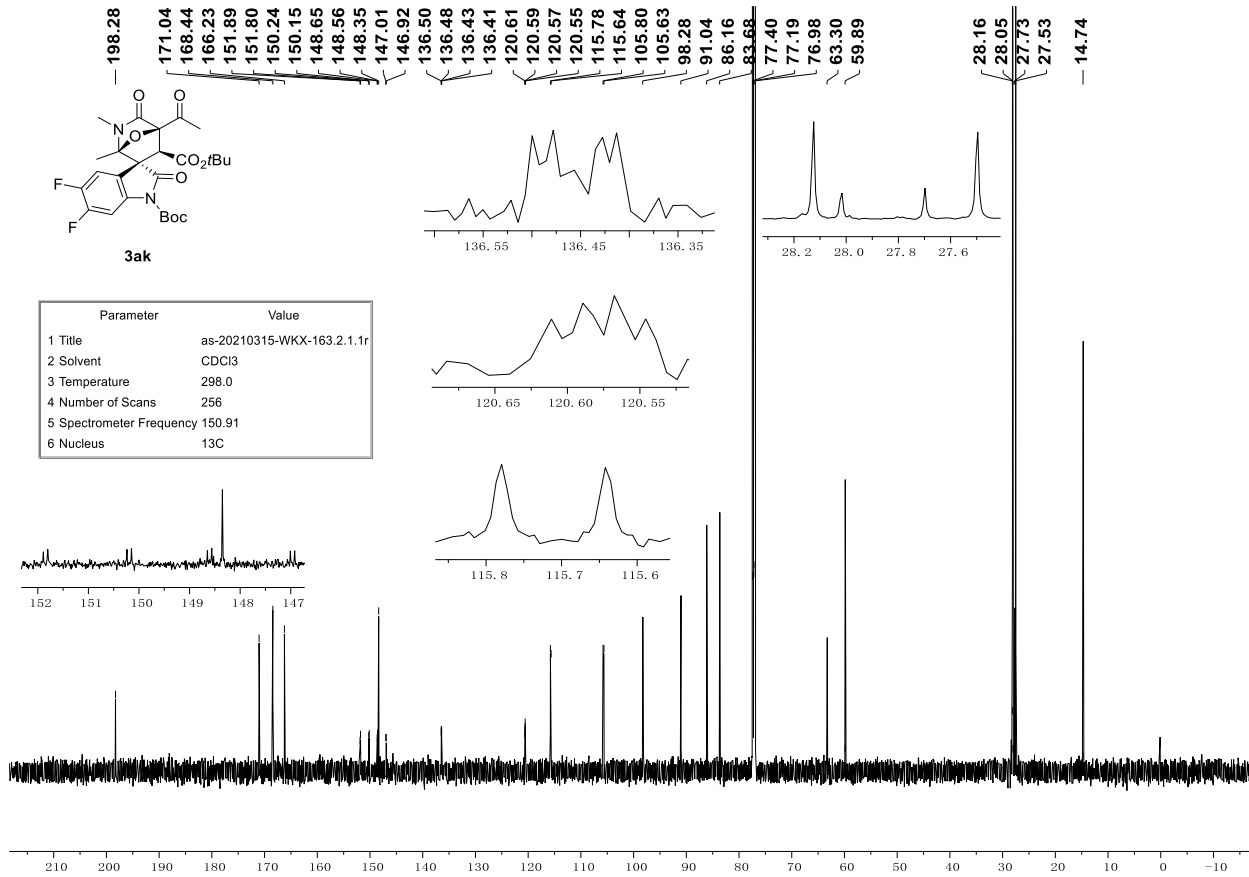

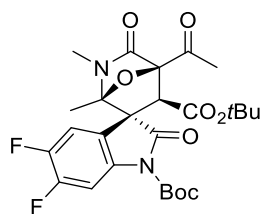

**3ak**

| Parameter                | Value                      |
|--------------------------|----------------------------|
| 1 Title                  | as-20210315-WKX-163.3.1.1r |
| 2 Solvent                | CDCl3                      |
| 3 Temperature            | 298.1                      |
| 4 Number of Scans        | 16                         |
| 5 Spectrometer Frequency | 564.72                     |
| 6 Nucleus                | 19F                        |

— -132.97  
— -141.12

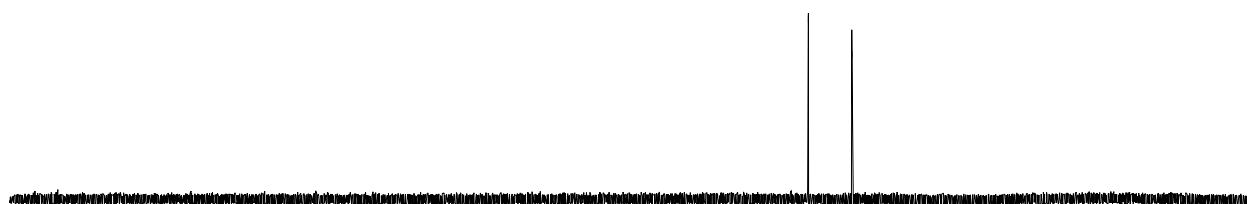

10 0 -10 -20 -30 -40 -50 -60 -70 -80 -90 -100 -110 -120 -130 -140 -150 -160 -170 -180 -190 -200 -210

7.26  
7.02  
6.97

3.82

2.87

2.46  
2.26  
2.21

1.60

1.26

0.95

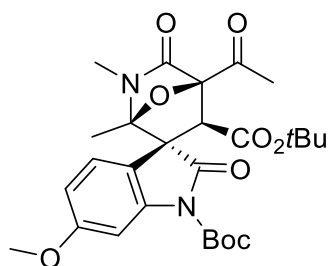

**3al**

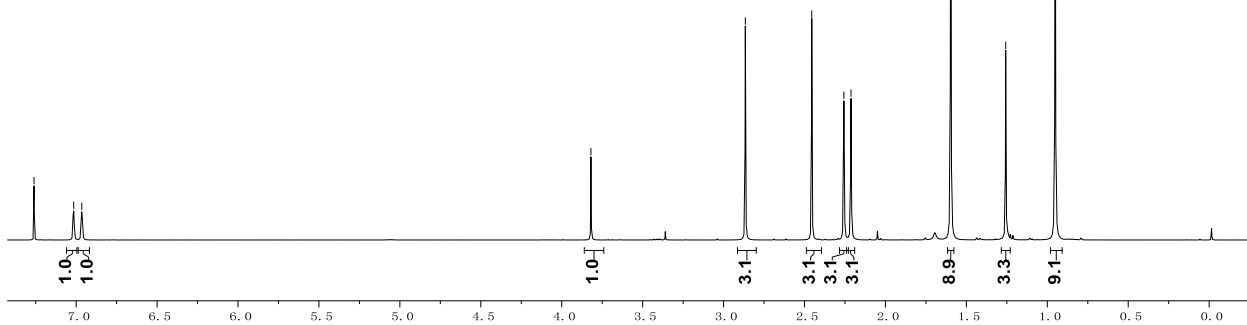

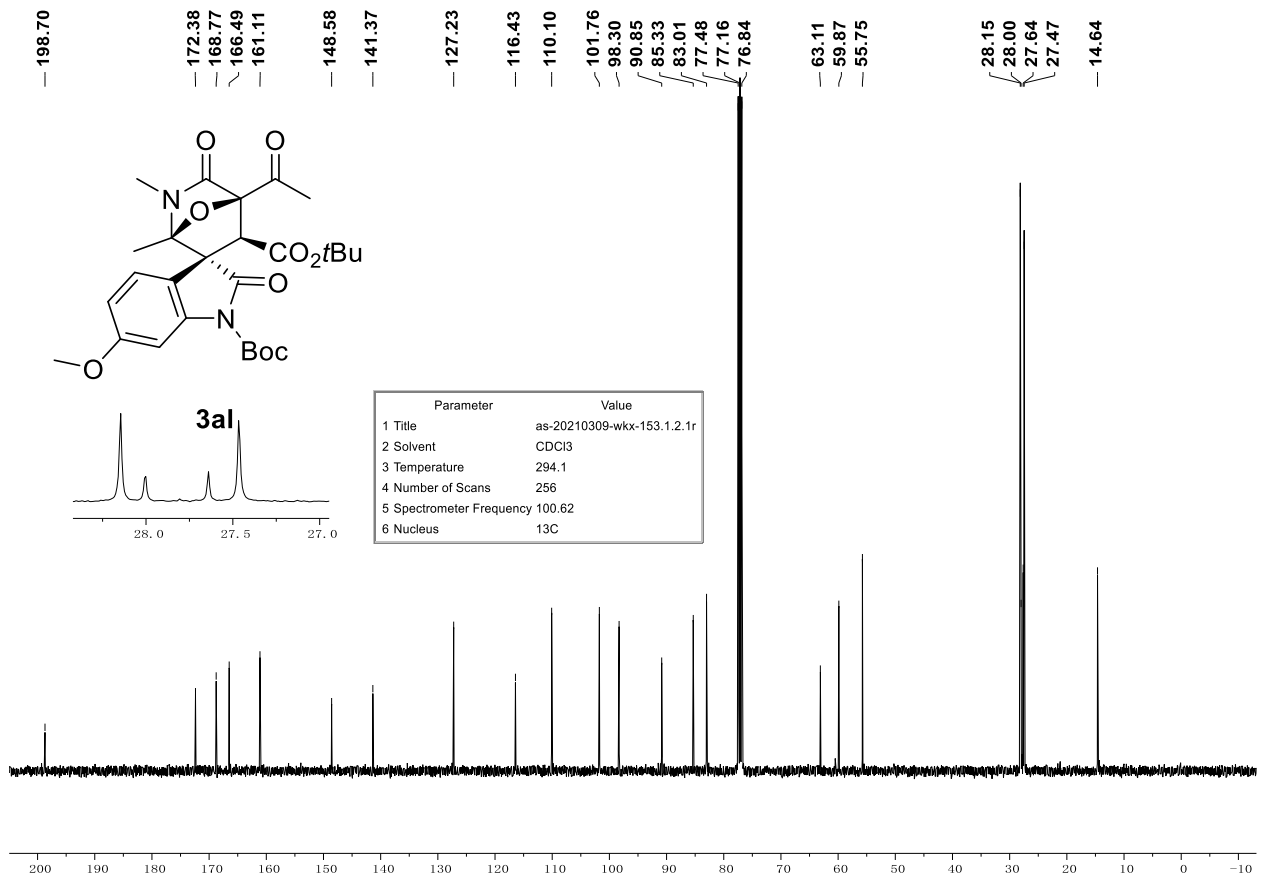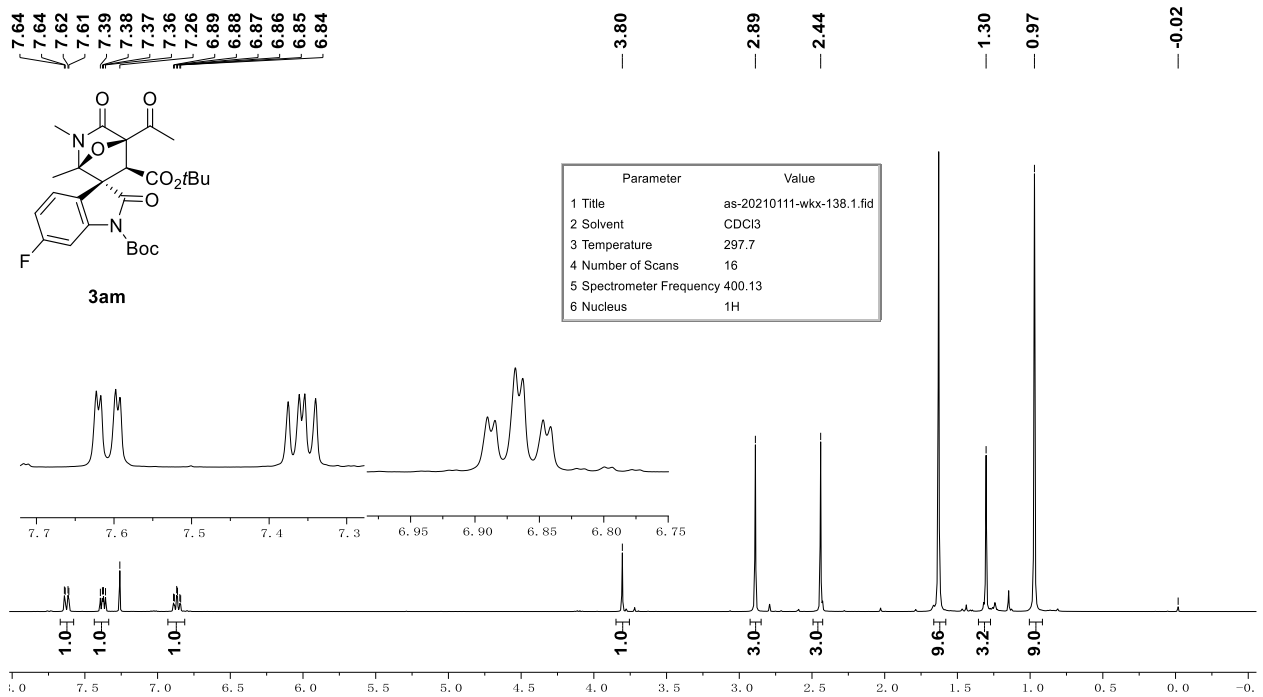

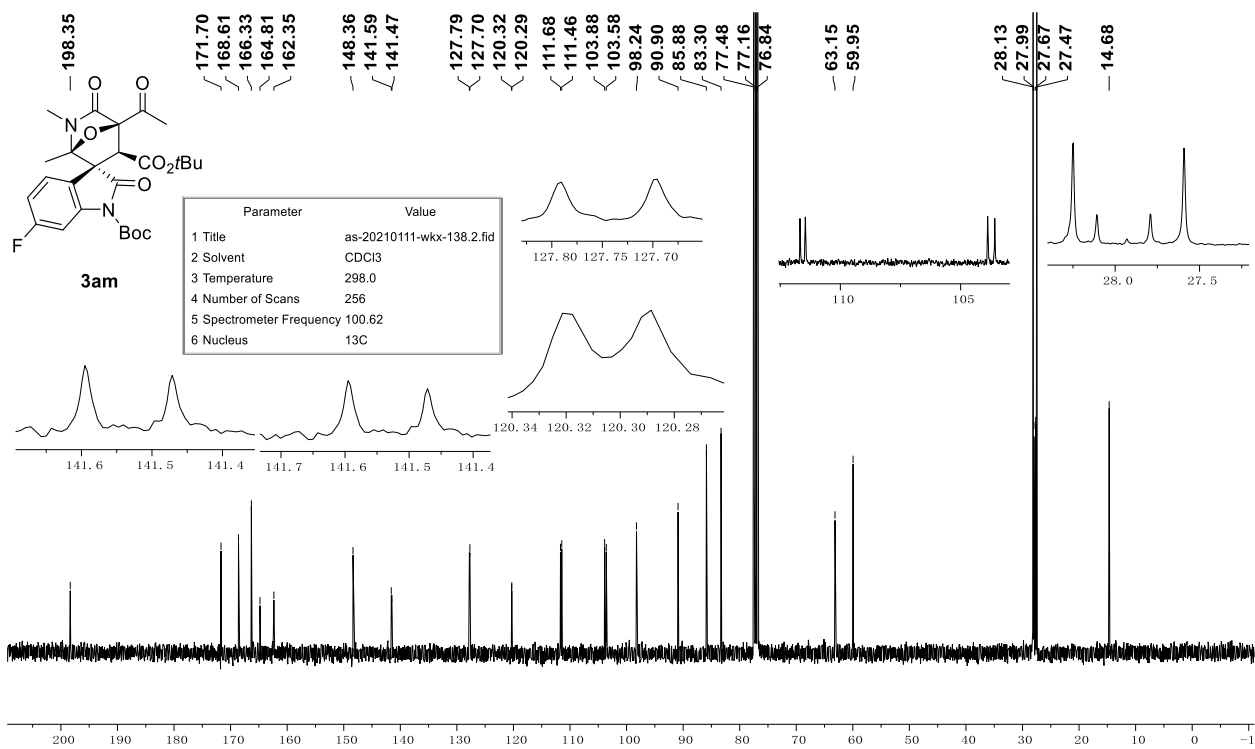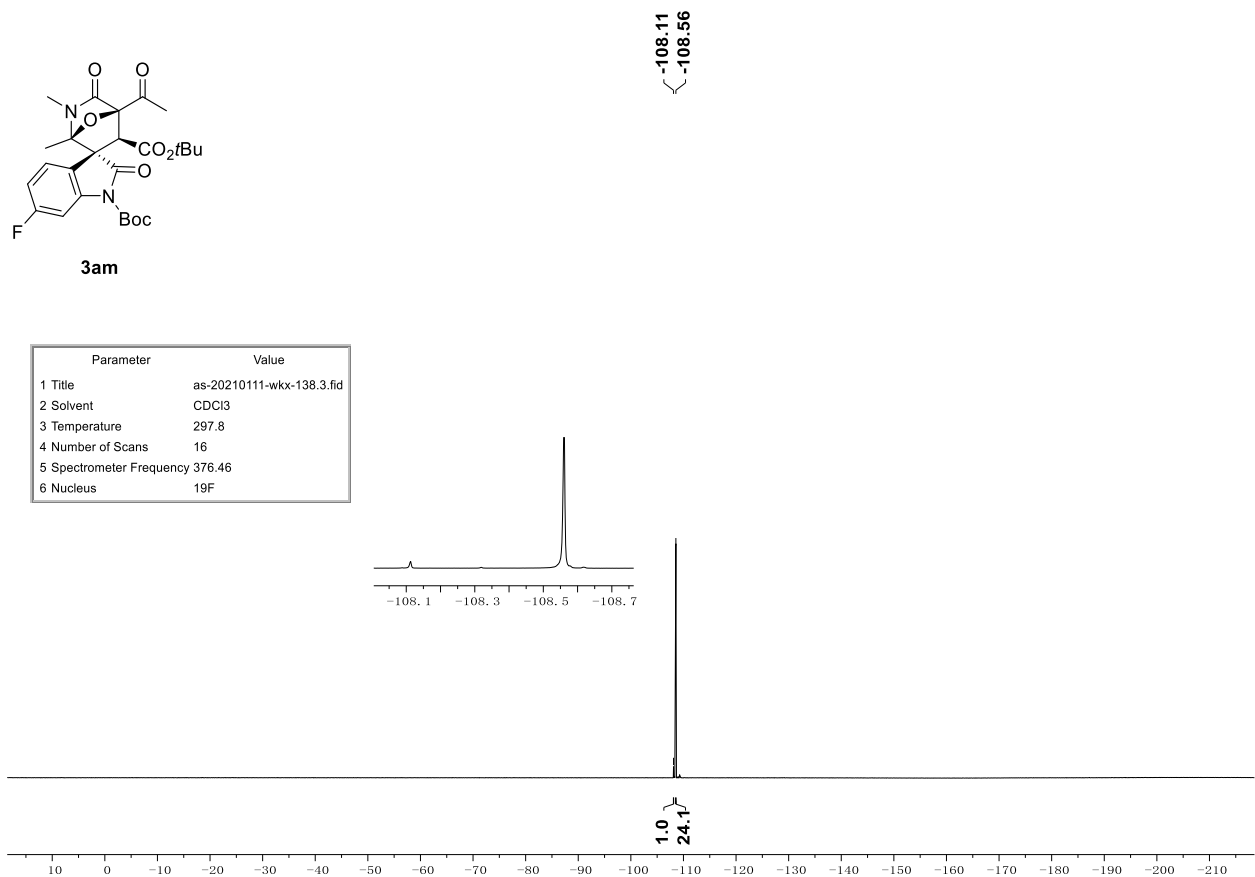



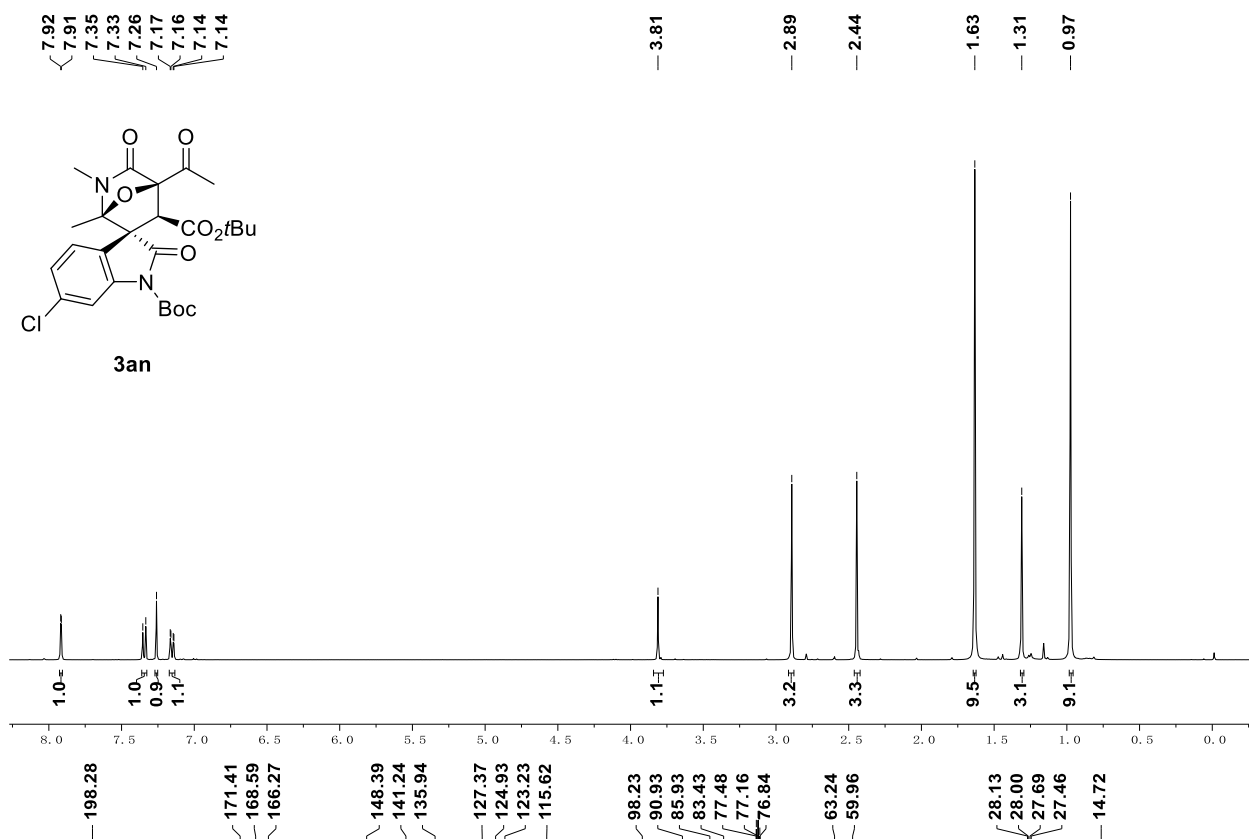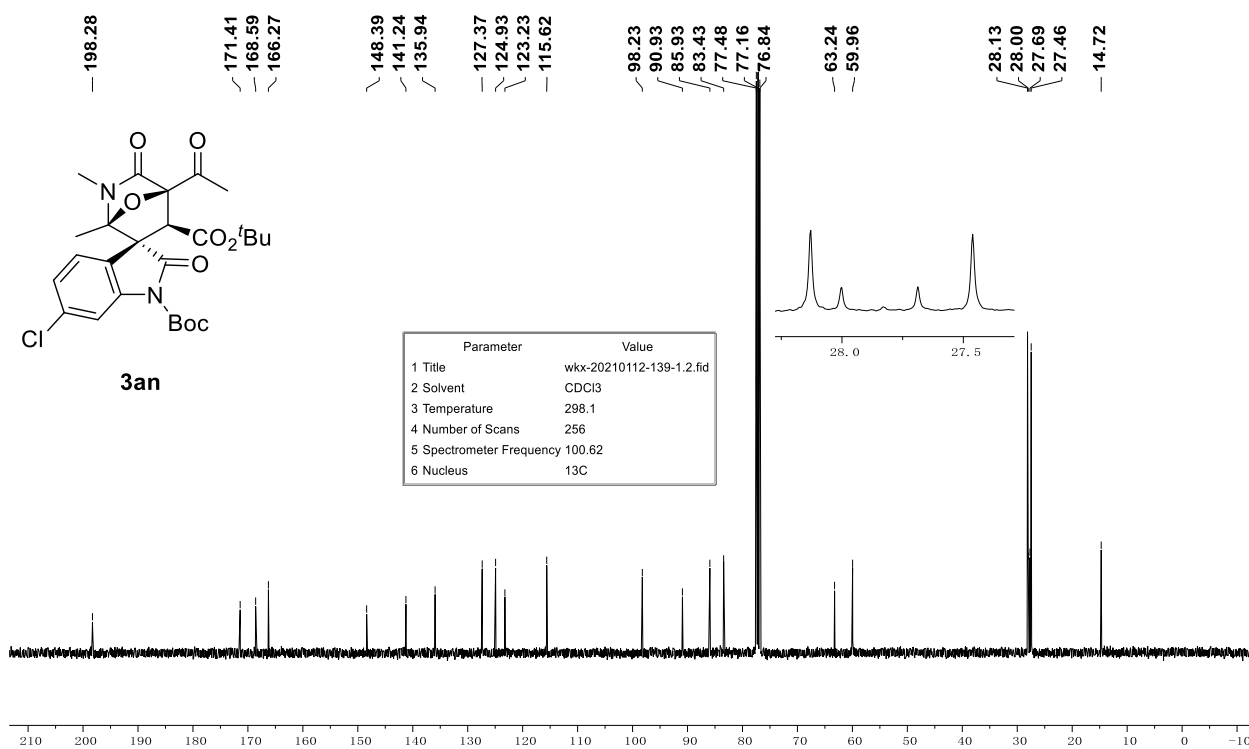

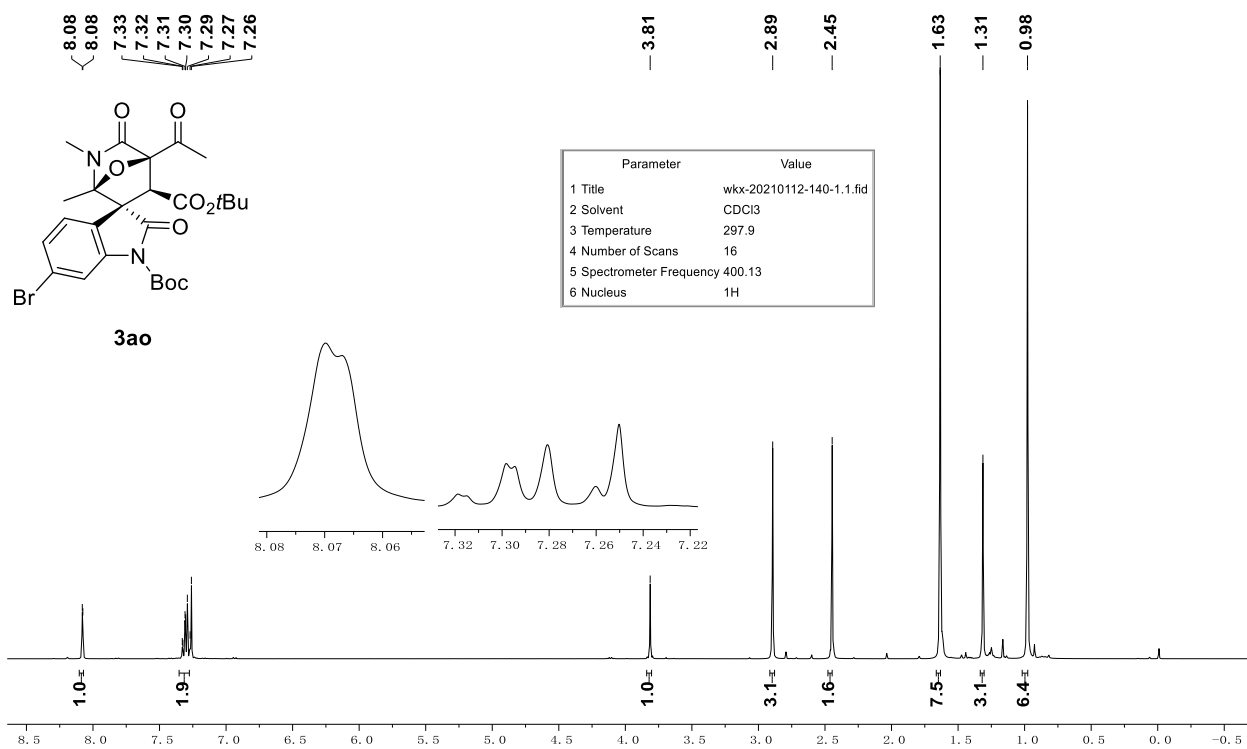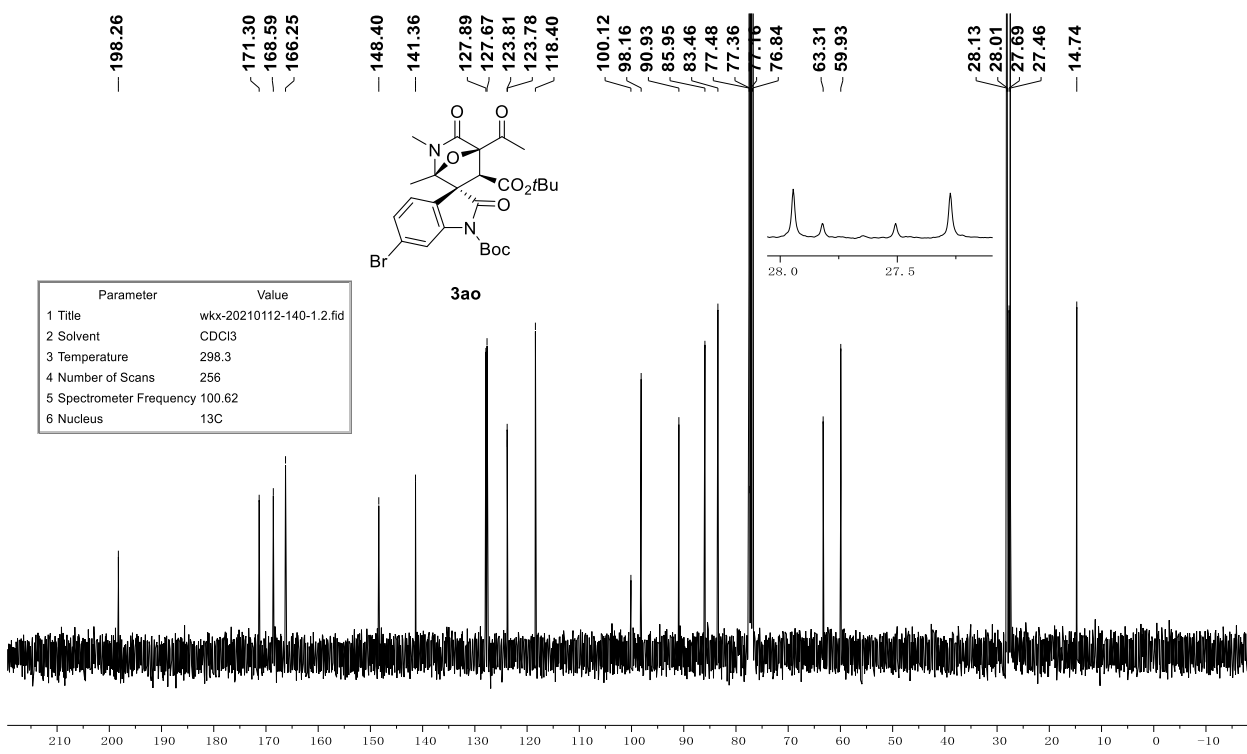

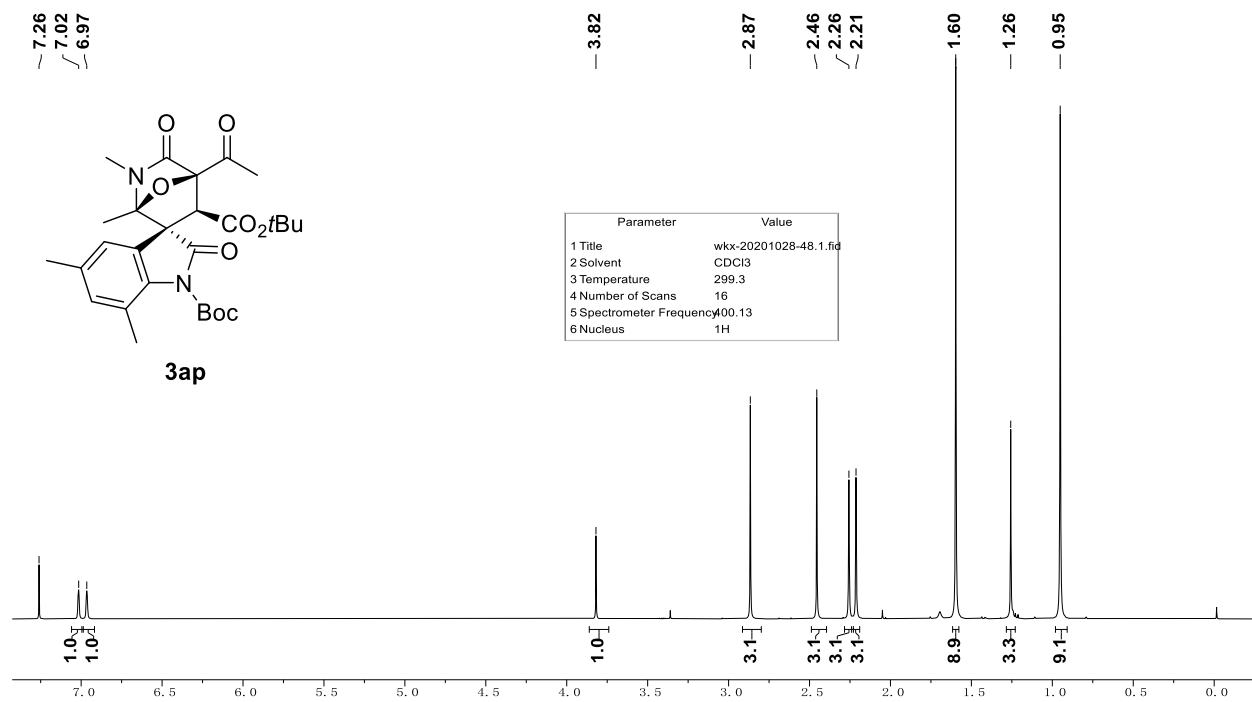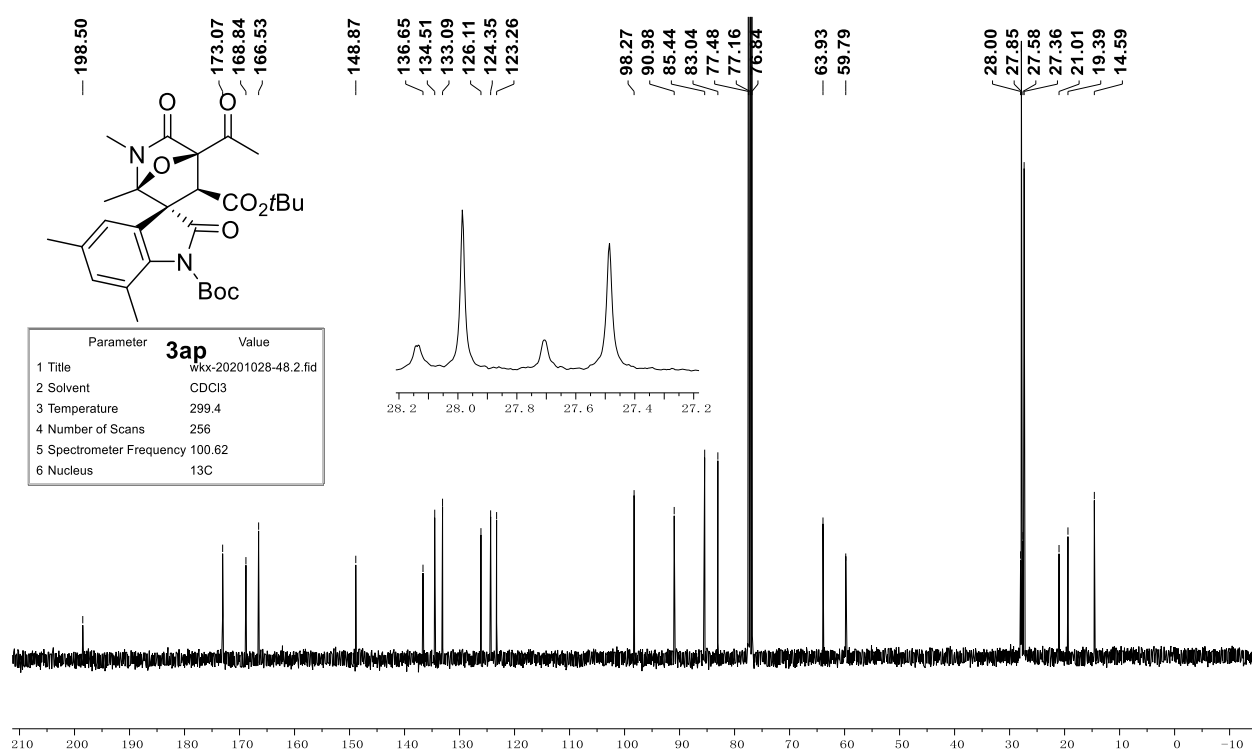

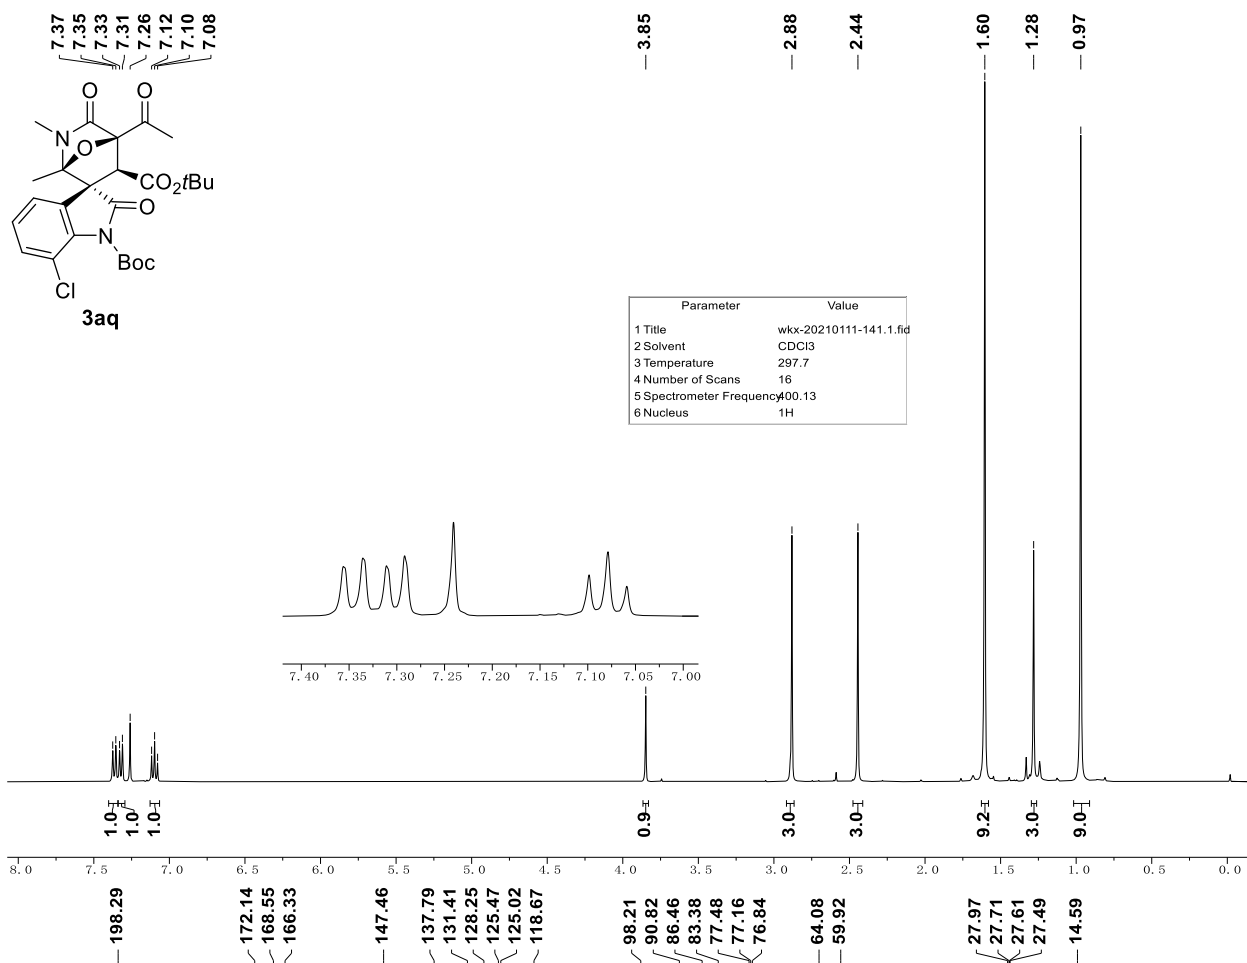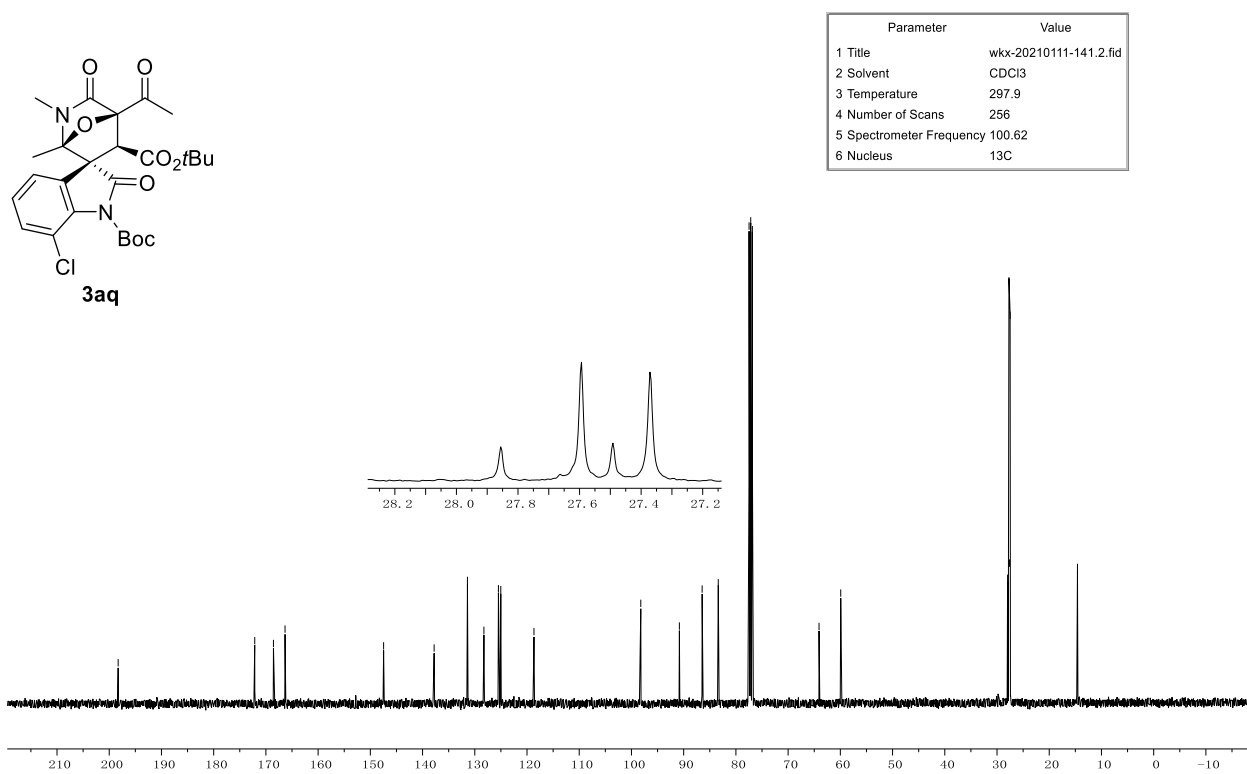

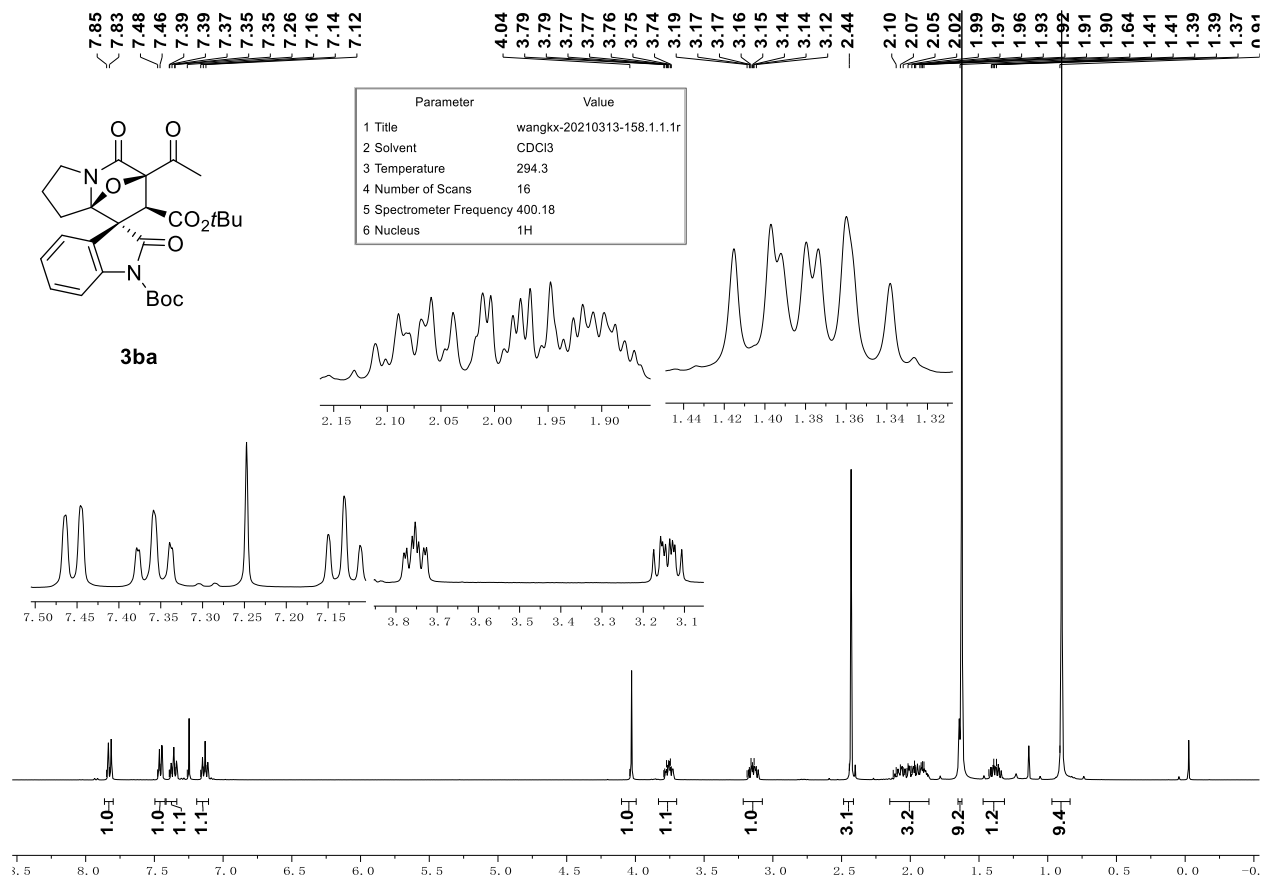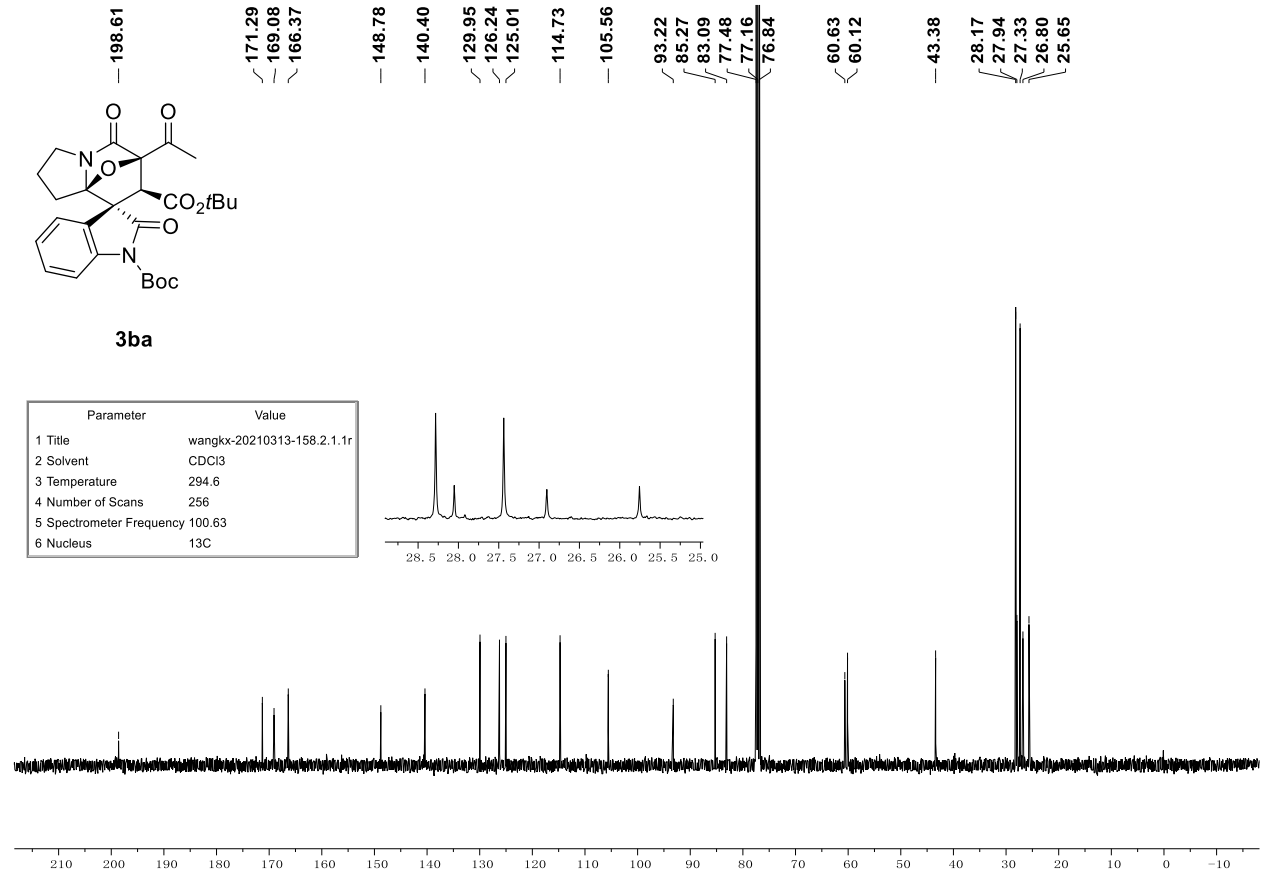

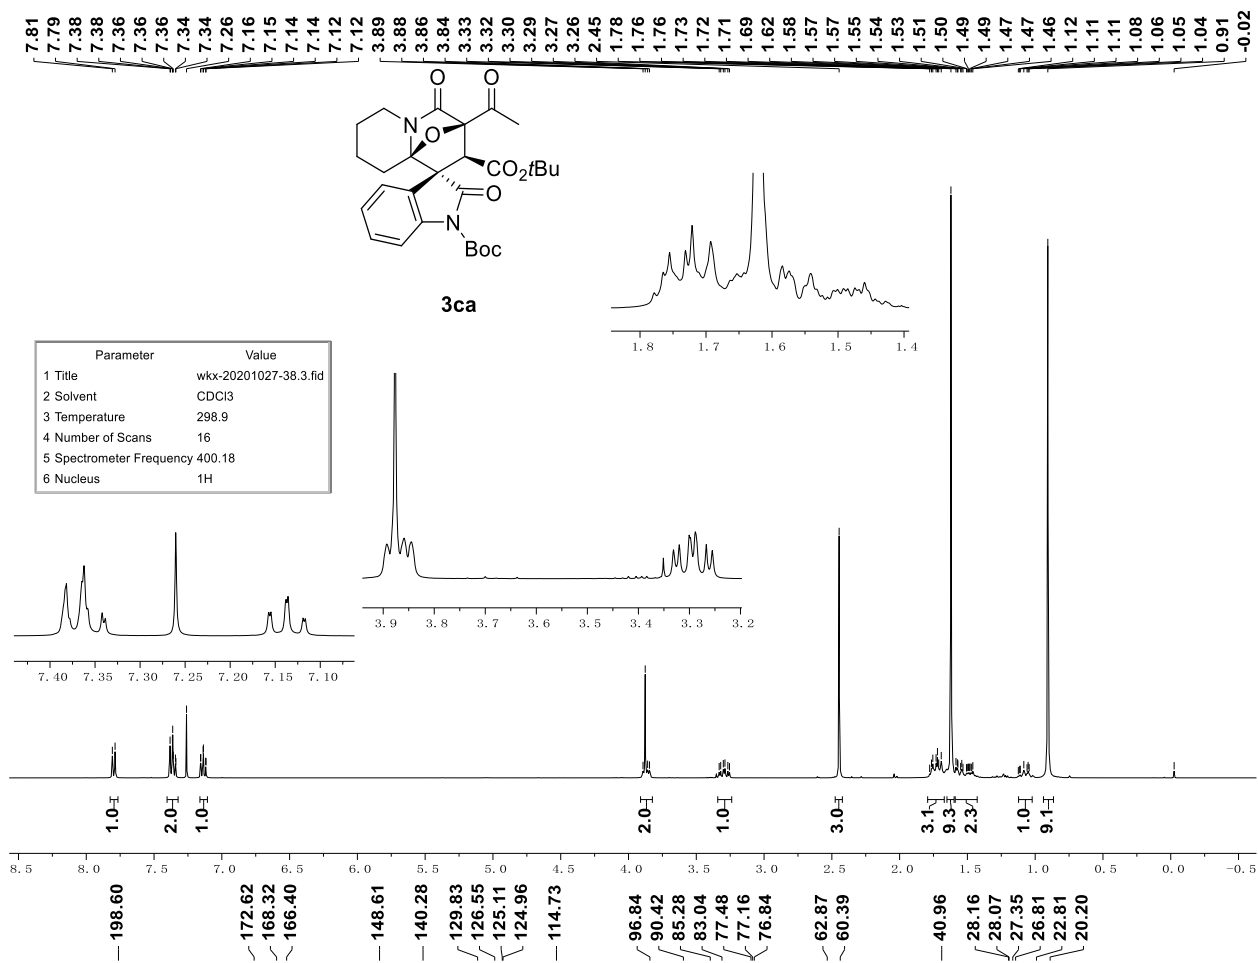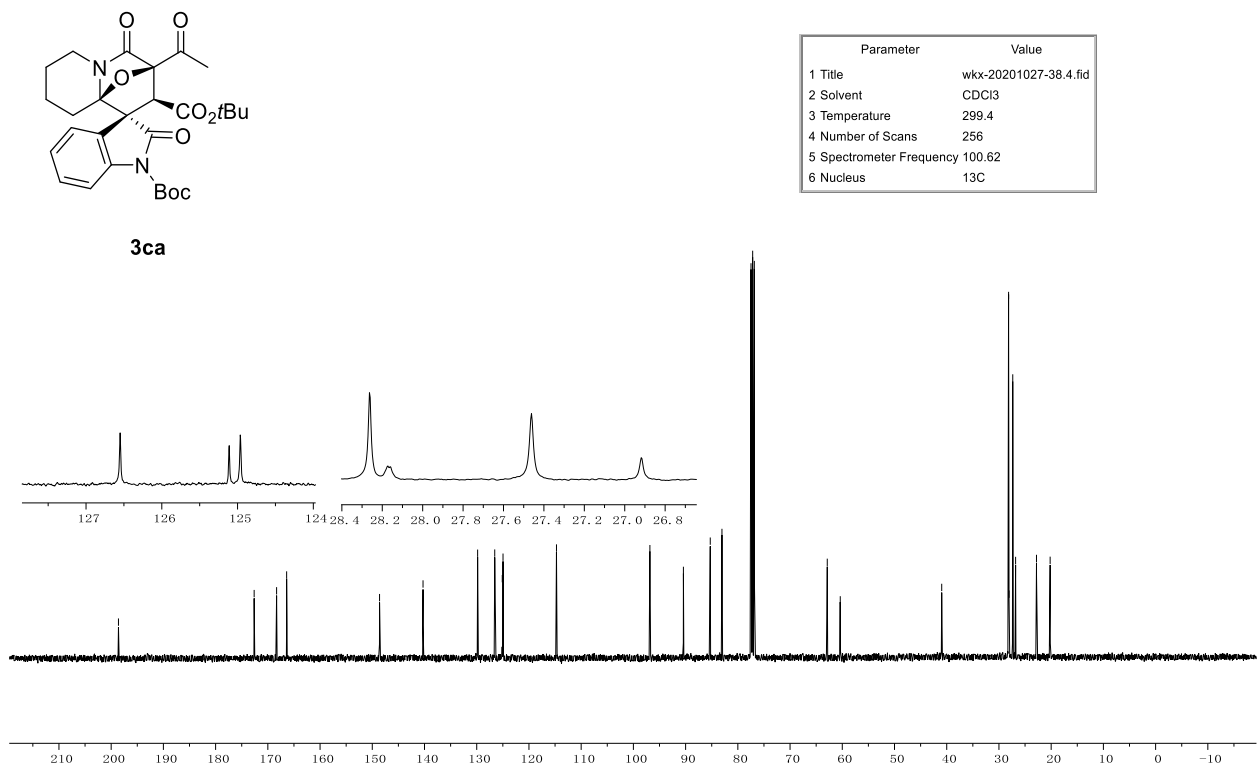

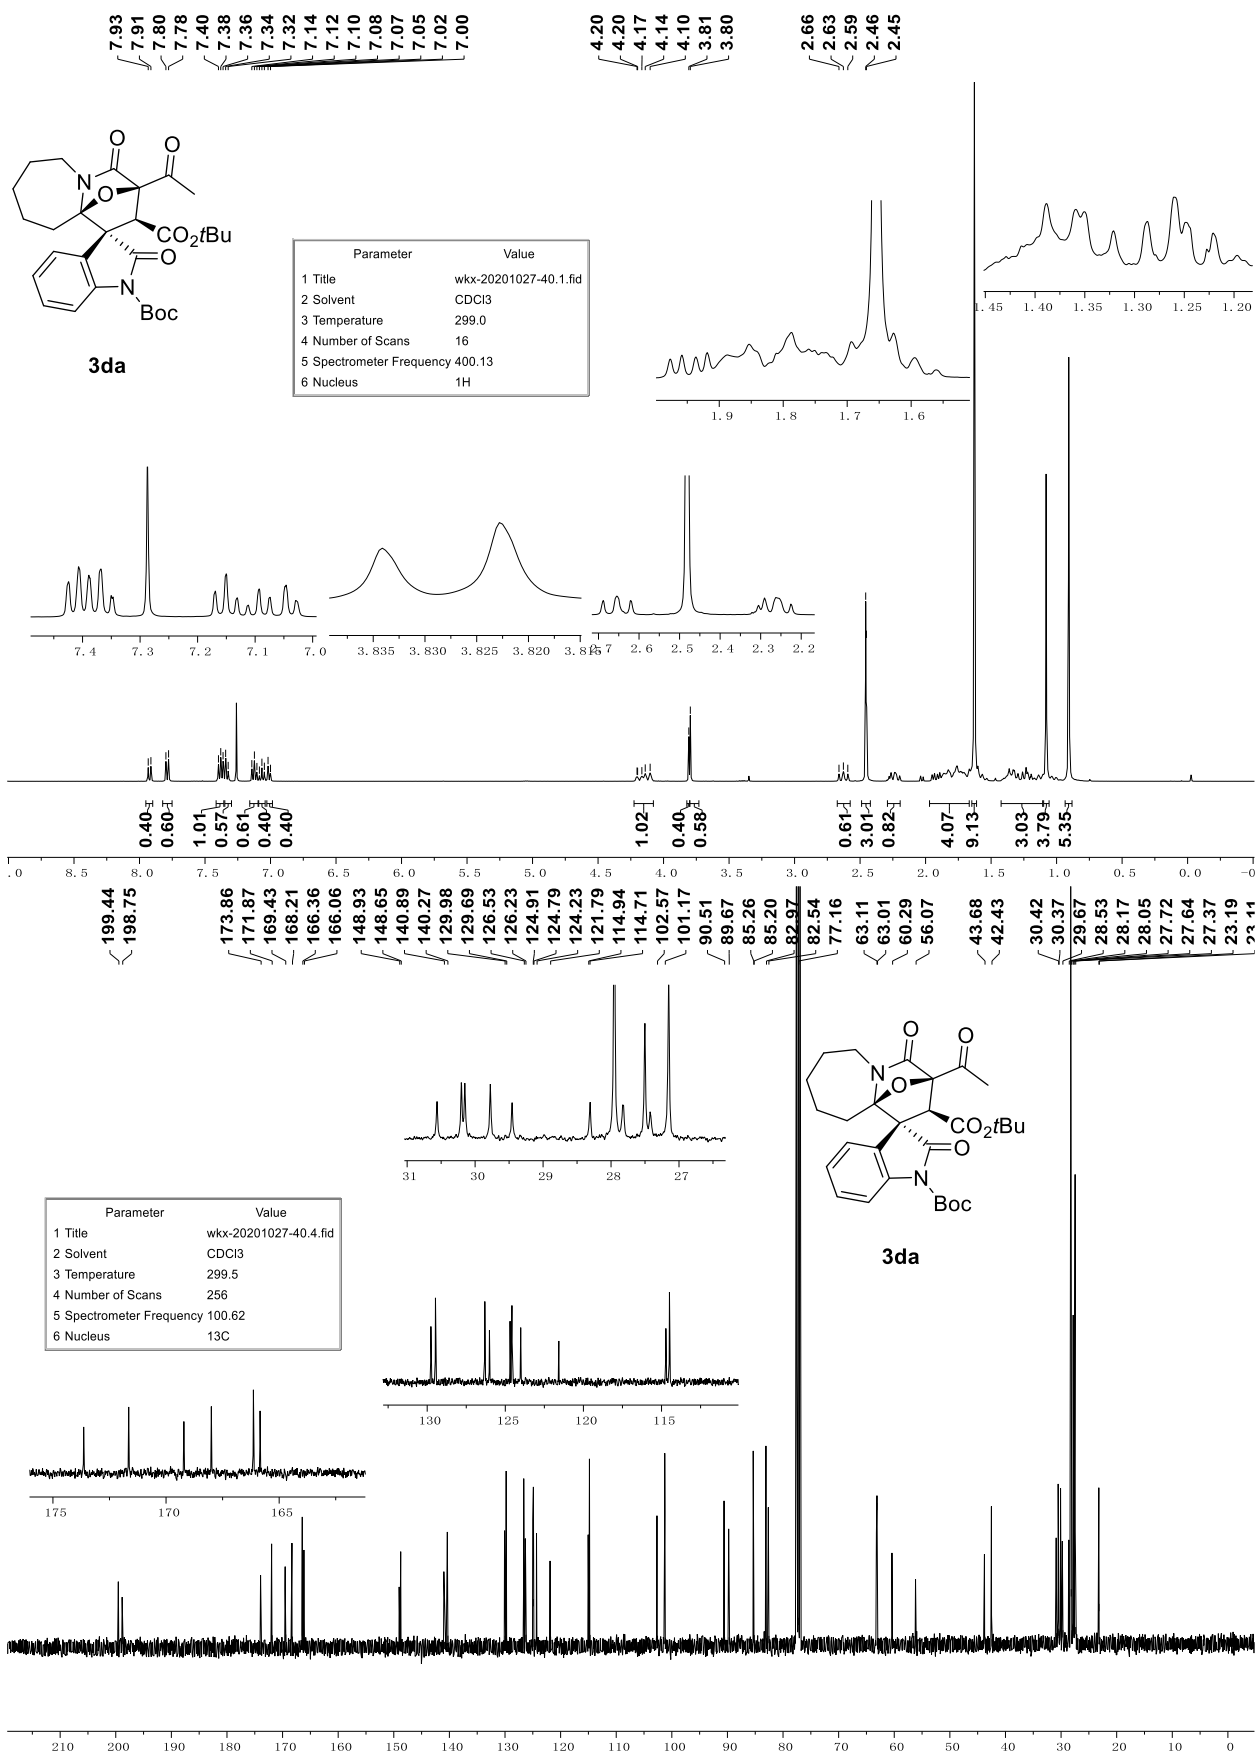

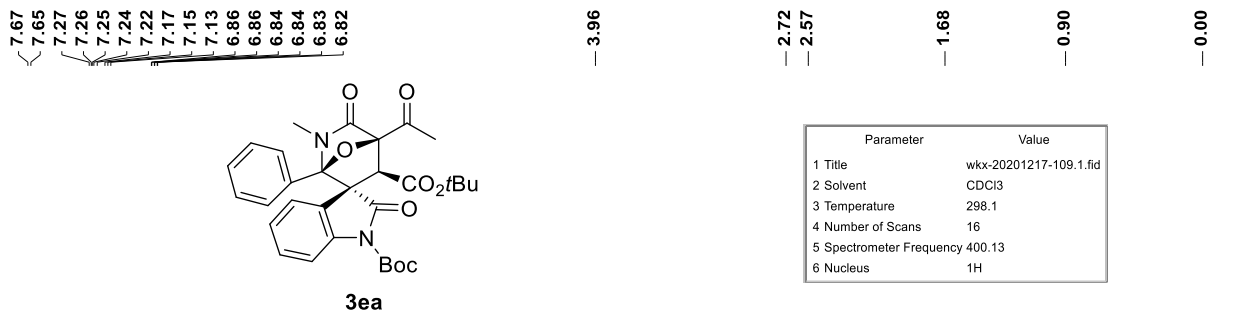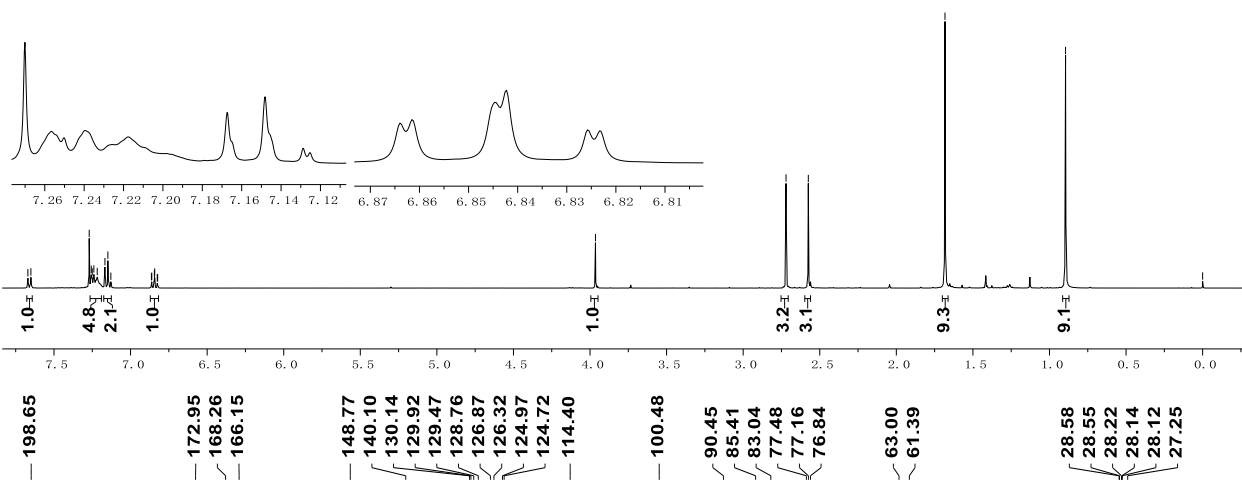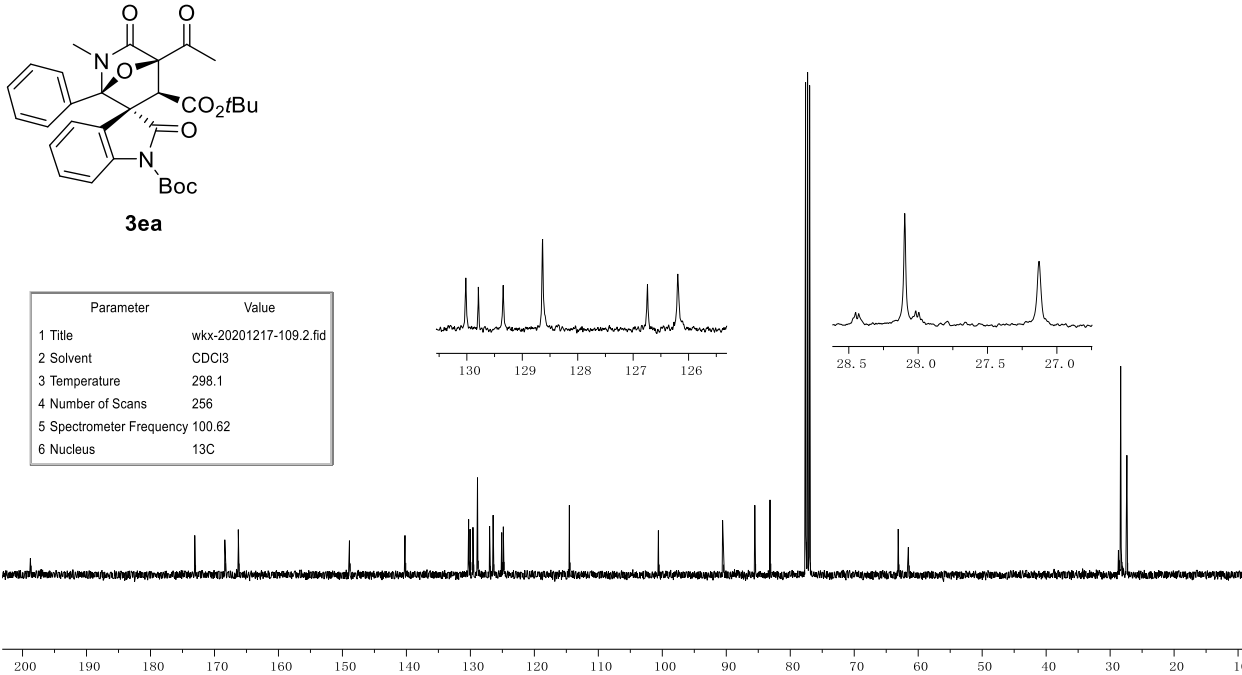



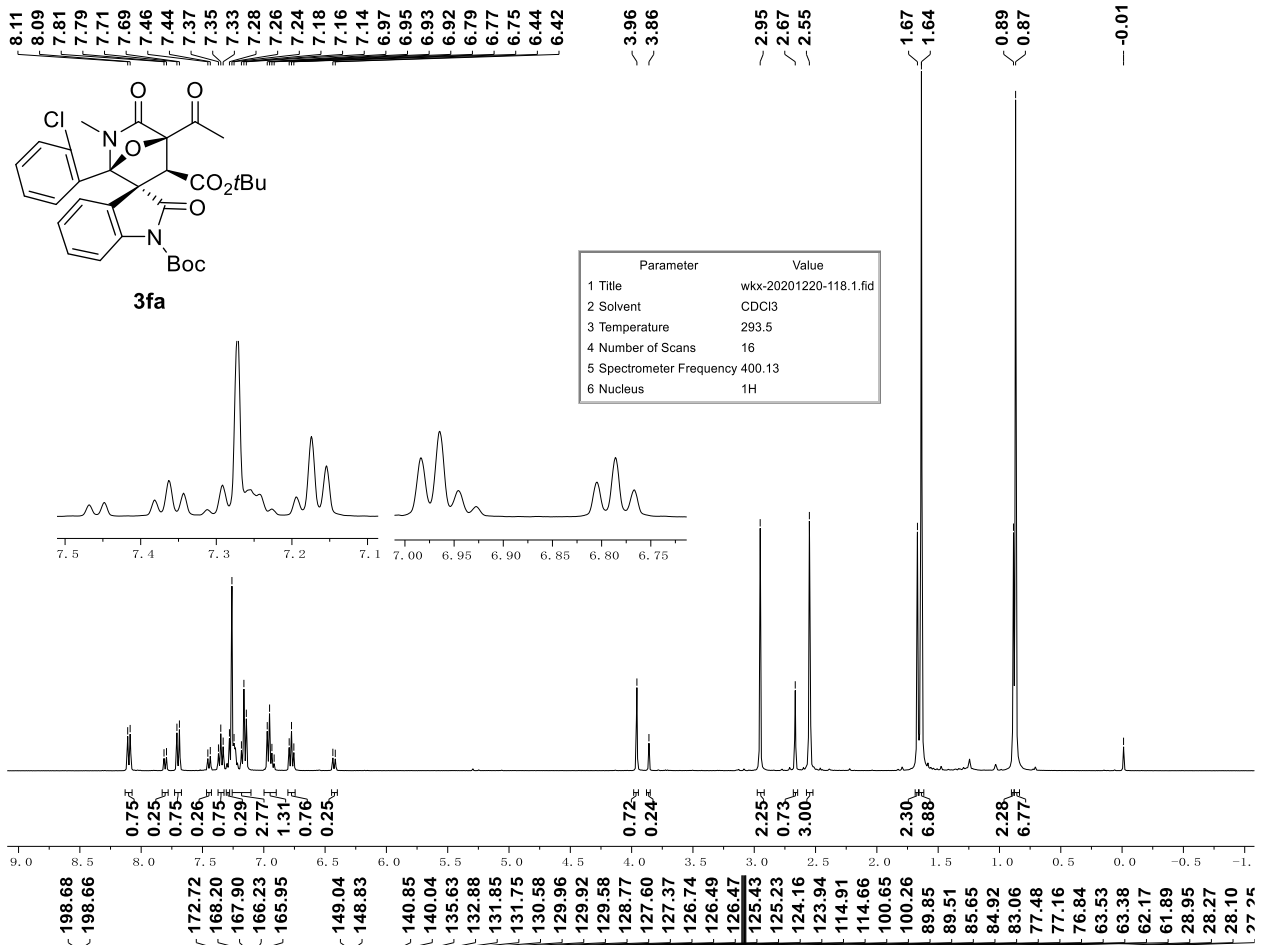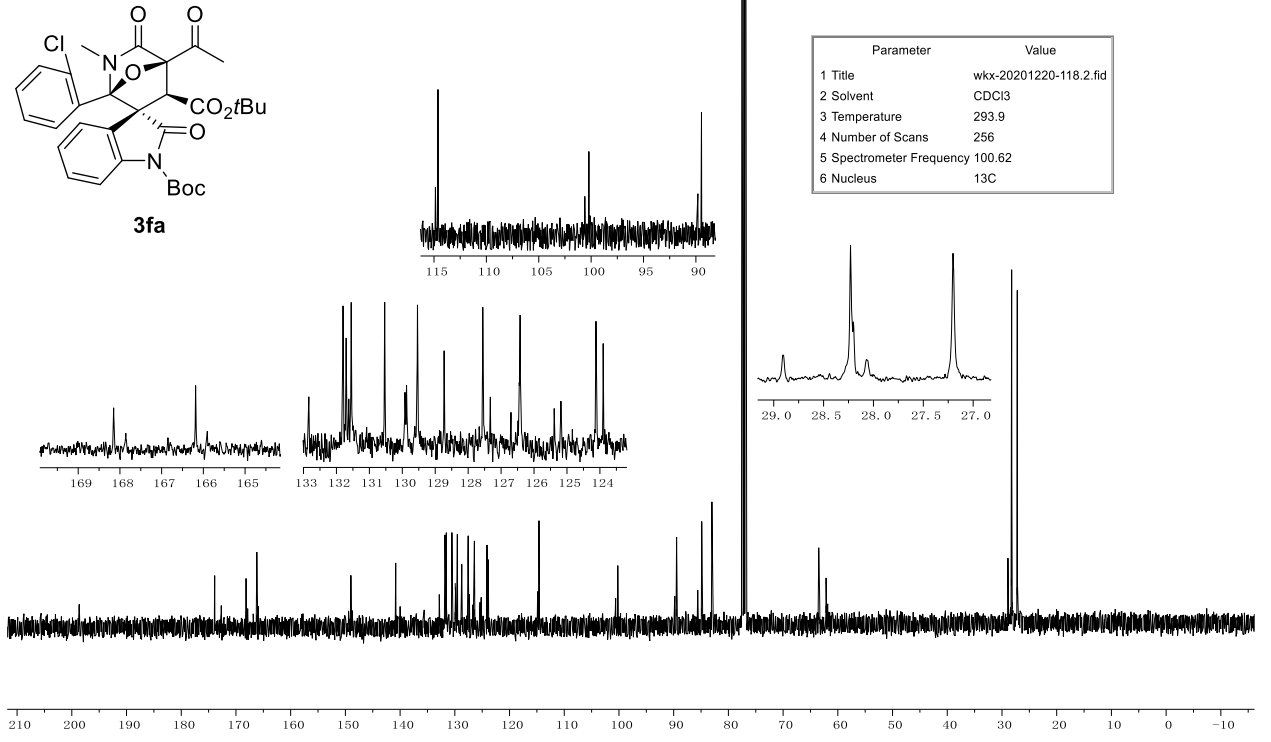

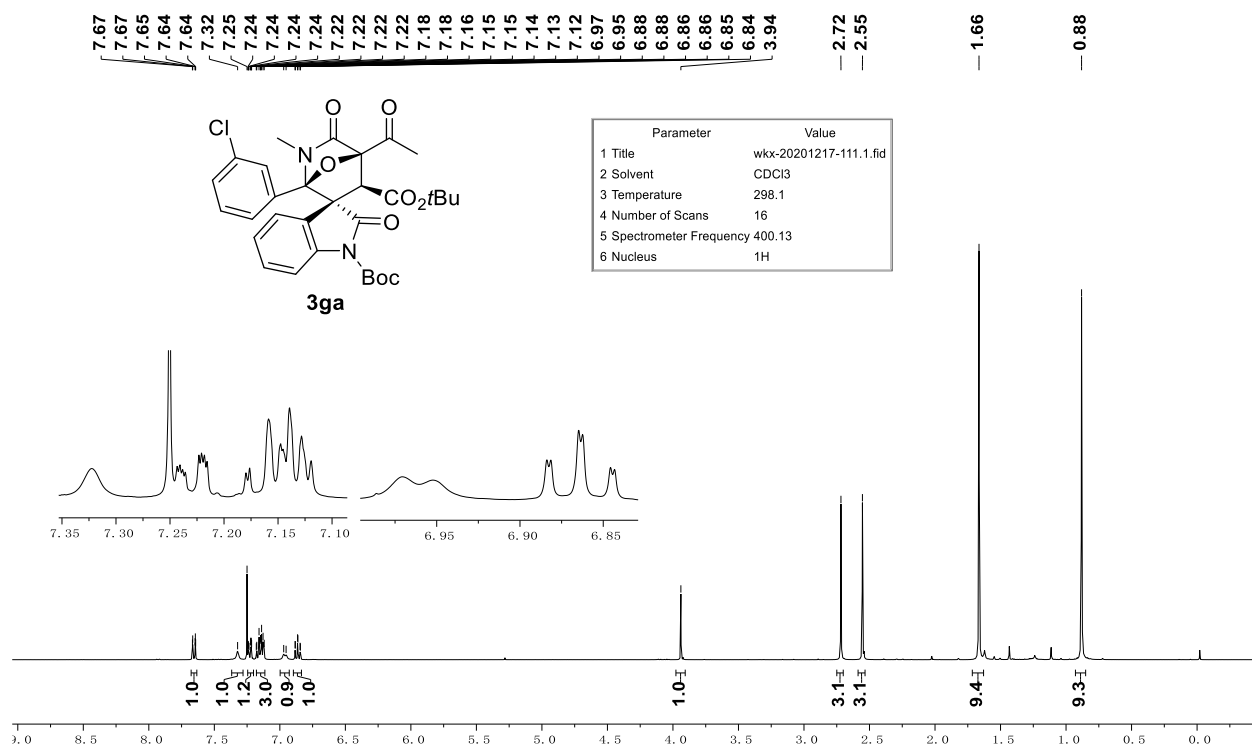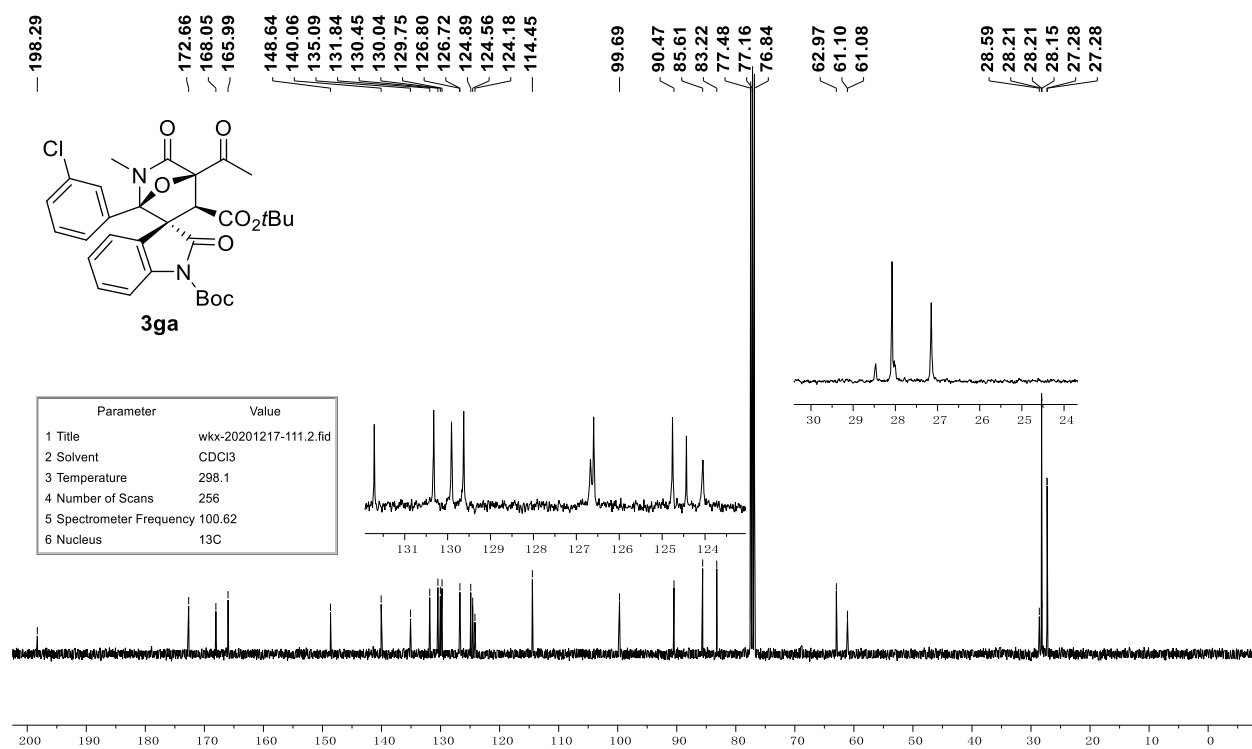

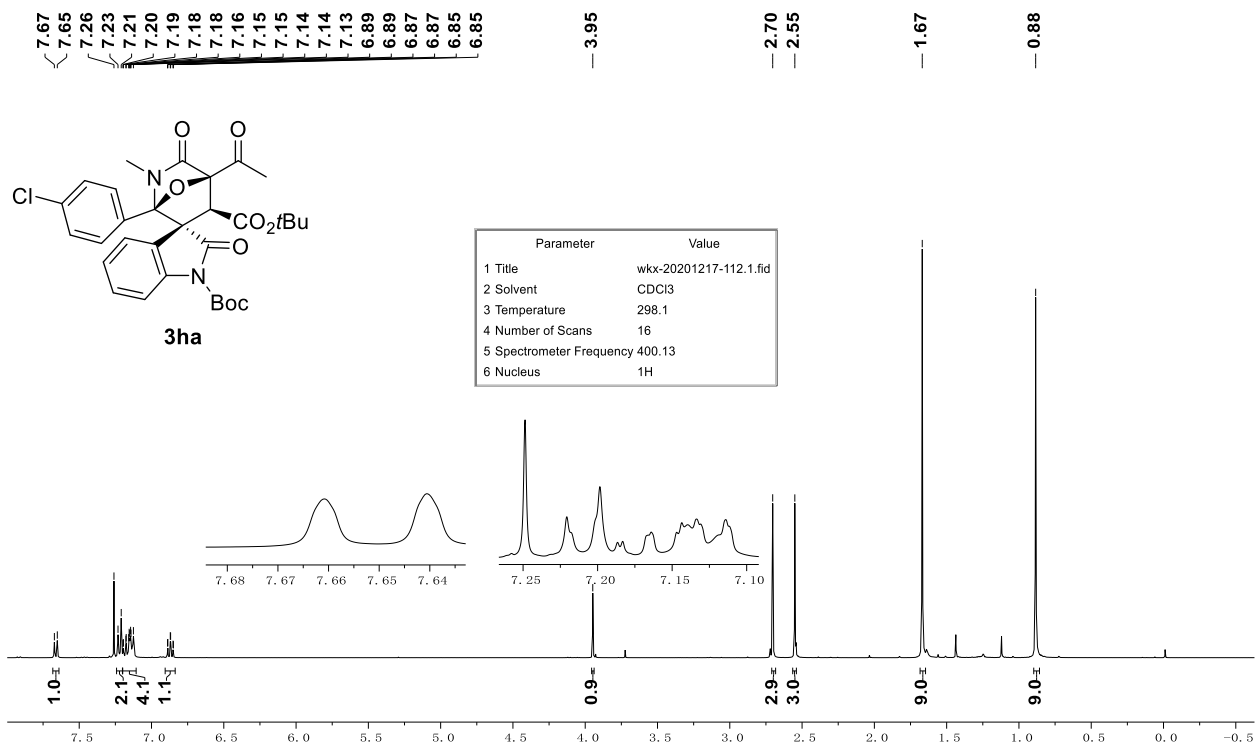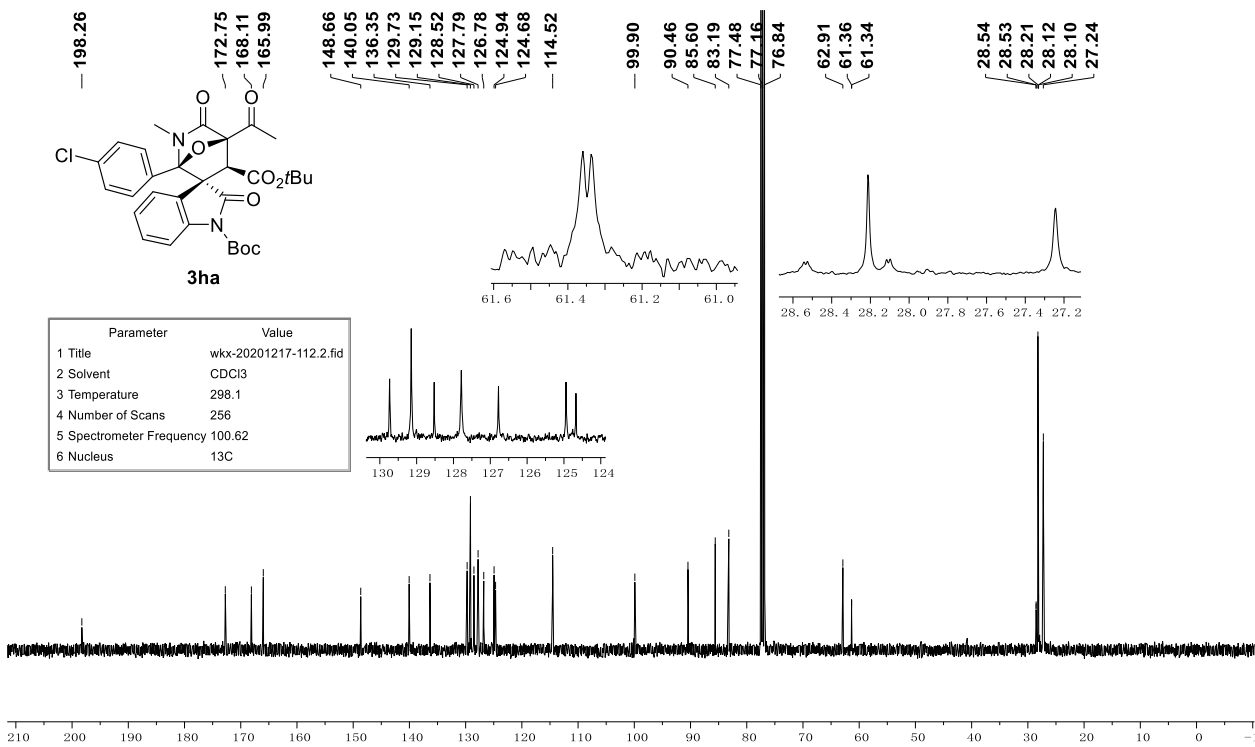

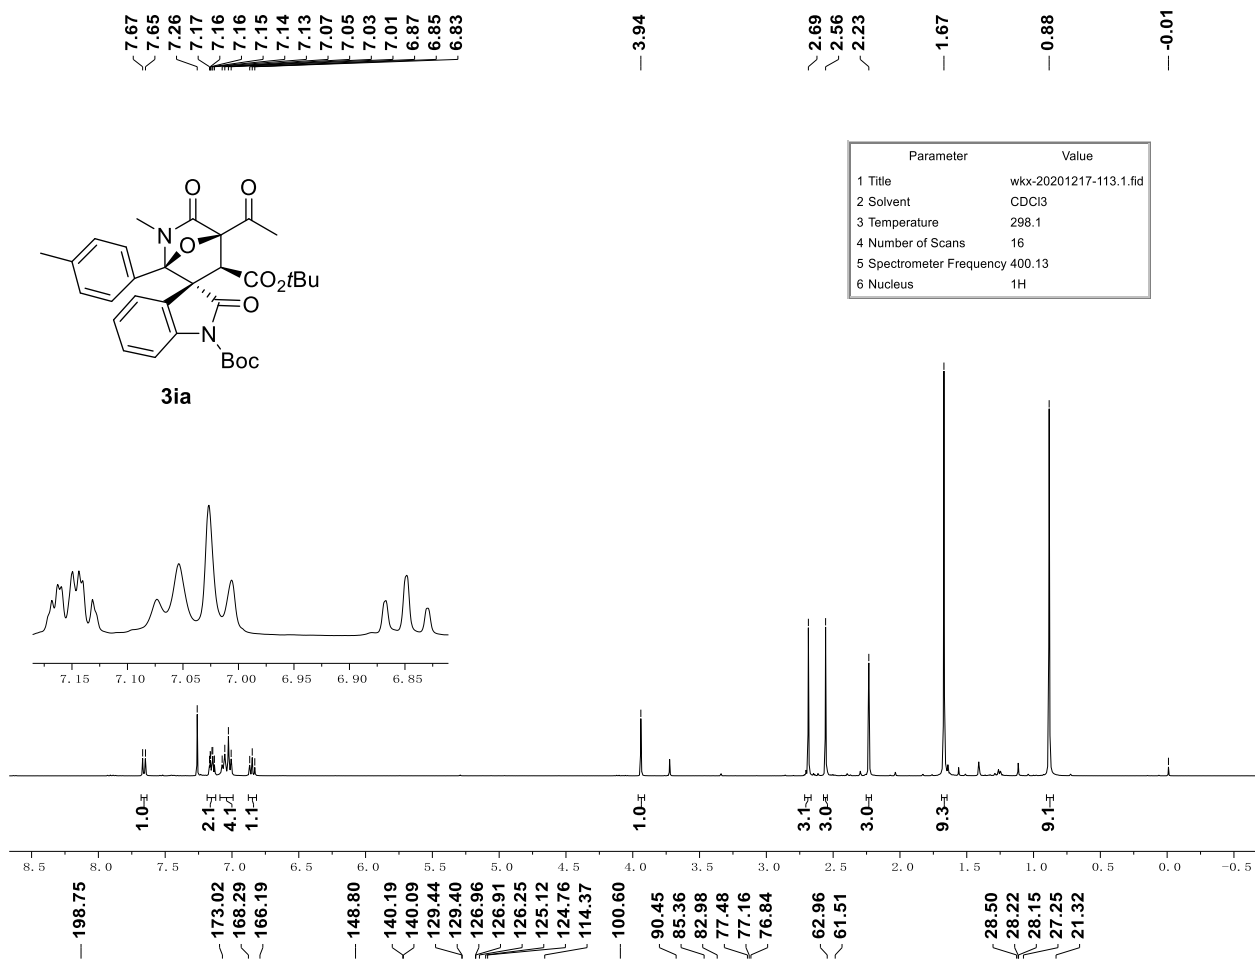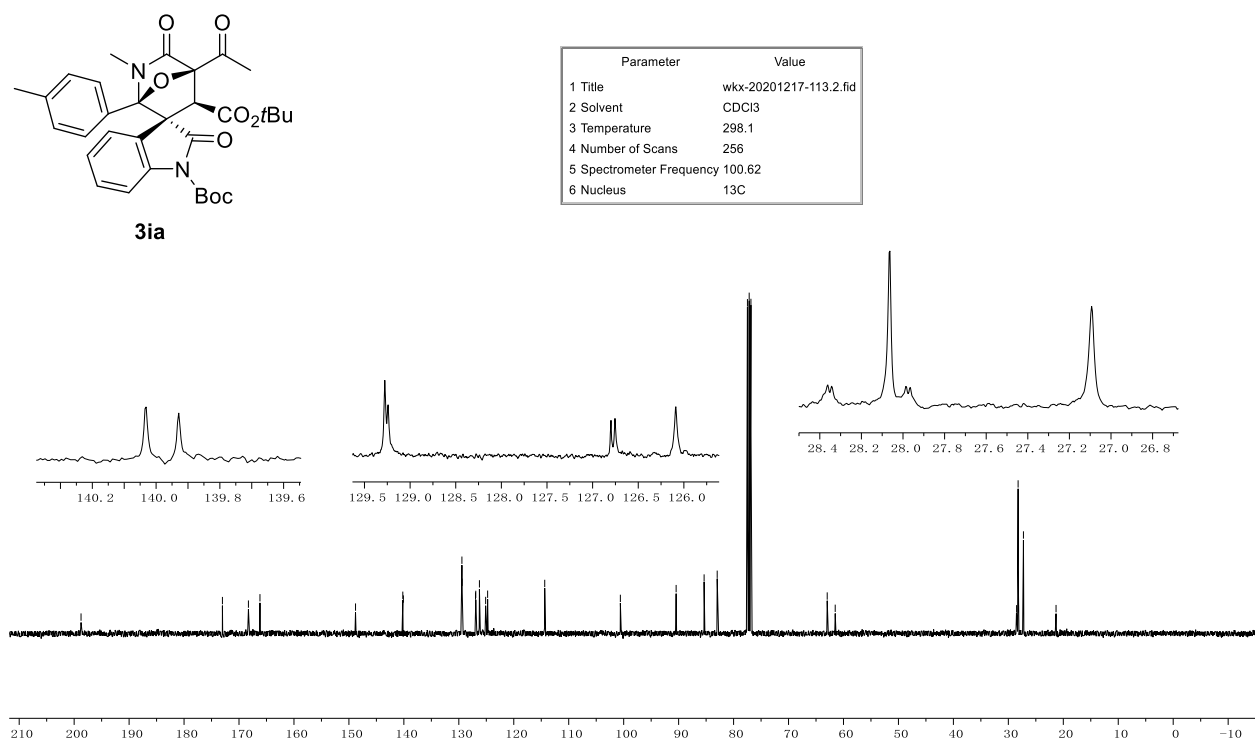

7.68  
7.66  
7.26  
7.18  
7.16  
7.14  
7.10  
7.08  
6.88  
6.86  
6.84  
6.74  
6.71

3.94  
3.72

2.68  
2.56

1.67

0.88

-0.01

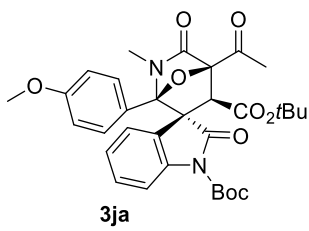

| Parameter                | Value                  |
|--------------------------|------------------------|
| 1 Title                  | wkx-20201222-121.1.fid |
| 2 Solvent                | CDCl3                  |
| 3 Temperature            | 293.3                  |
| 4 Number of Scans        | 16                     |
| 5 Spectrometer Frequency | 400.13                 |
| 6 Nucleus                | 13C                    |

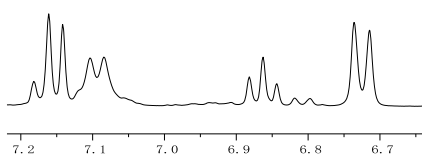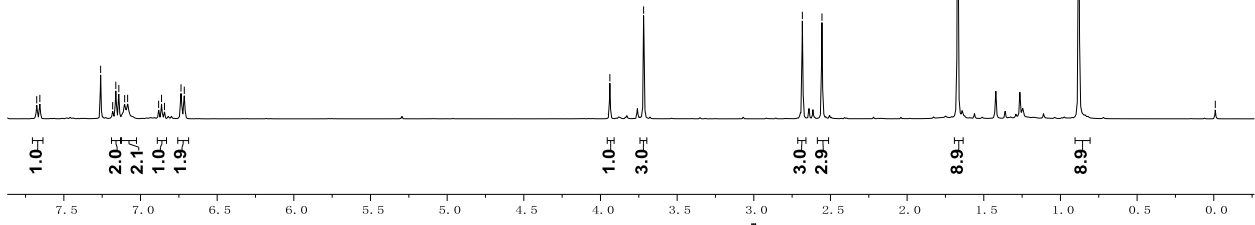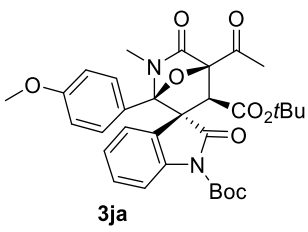

| Parameter                | Value                  |
|--------------------------|------------------------|
| 1 Title                  | wkx-20201222-121.2.fid |
| 2 Solvent                | CDCl3                  |
| 3 Temperature            | 293.3                  |
| 4 Number of Scans        | 256                    |
| 5 Spectrometer Frequency | 100.62                 |
| 6 Nucleus                | 13C                    |

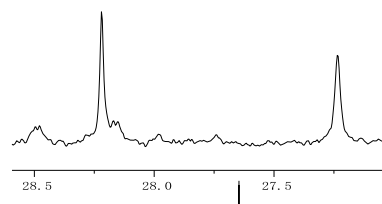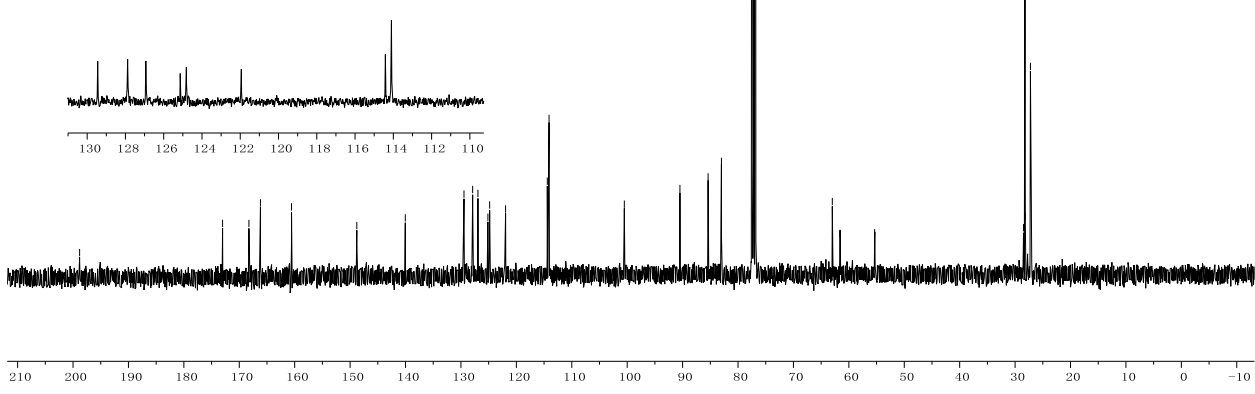

7.83  
7.77  
7.75  
7.74  
7.73  
7.69  
7.67  
7.65  
7.63  
7.50  
7.50  
7.49  
7.49  
7.48  
7.48  
7.26  
7.20  
7.20  
7.18  
7.18  
7.10  
7.09  
7.08  
7.07  
7.06  
7.05  
6.78  
6.78  
6.76  
6.76  
6.75  
6.74  
4.02

2.73  
2.62  
1.71  
1.60  
0.90  
-0.01

| Parameter                | Value                     |
|--------------------------|---------------------------|
| 1 Title                  | wangxx-20210313-155.1.fid |
| 2 Solvent                | CDCl3                     |
| 3 Temperature            | 294.1                     |
| 4 Number of Scans        | 16                        |
| 5 Spectrometer Frequency | 400.13                    |
| 6 Nucleus                | 1H                        |

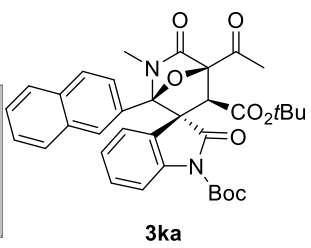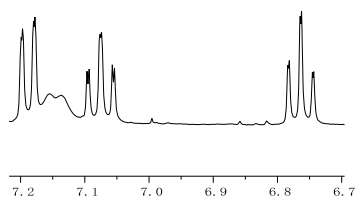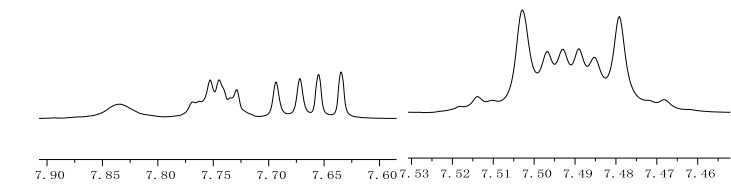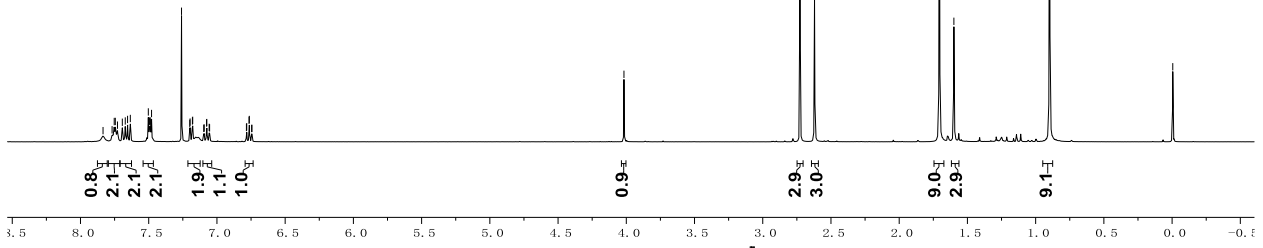

198.69  
173.13  
168.31  
166.17  
148.83  
140.10  
133.61  
132.65  
129.54  
128.77  
128.55  
127.81  
127.55  
127.26  
127.05  
126.87  
124.90  
124.86  
122.48  
114.37  
100.65  
90.58  
85.51  
83.13  
77.46  
77.16  
76.84  
63.07  
61.45  
28.68  
28.26  
28.24  
27.27

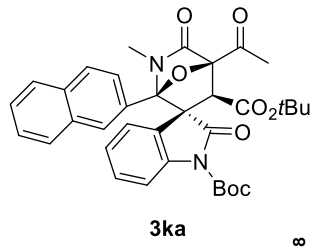

| Parameter                | Value                     |
|--------------------------|---------------------------|
| 1 Title                  | wangxx-20210313-155.2.fid |
| 2 Solvent                | CDCl3                     |
| 3 Temperature            | 294.7                     |
| 4 Number of Scans        | 512                       |
| 5 Spectrometer Frequency | 100.62                    |
| 6 Nucleus                | 13C                       |

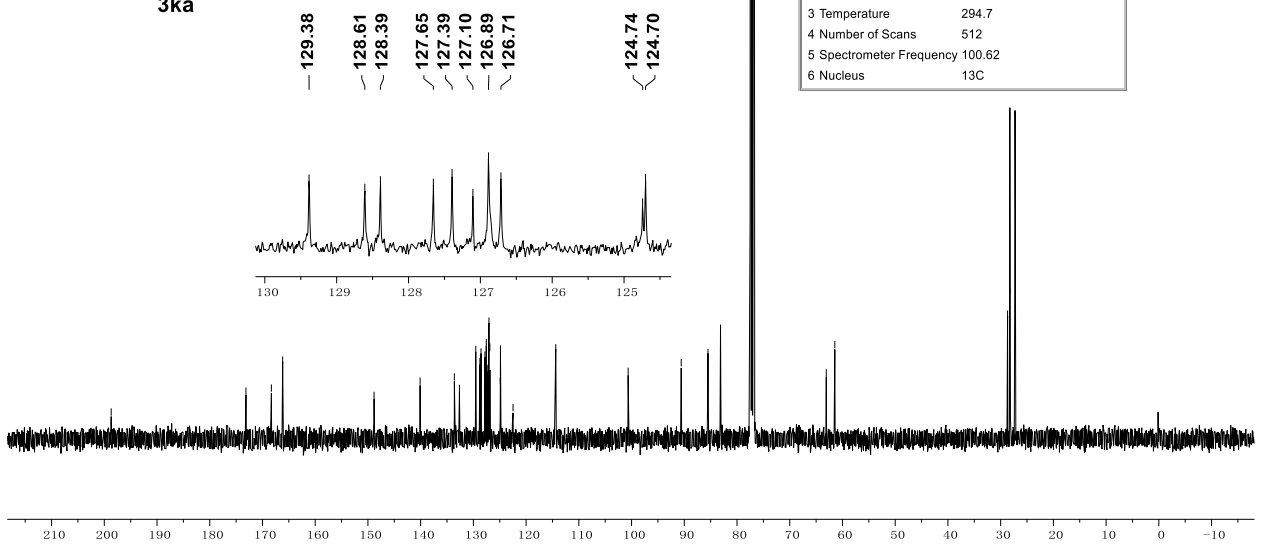

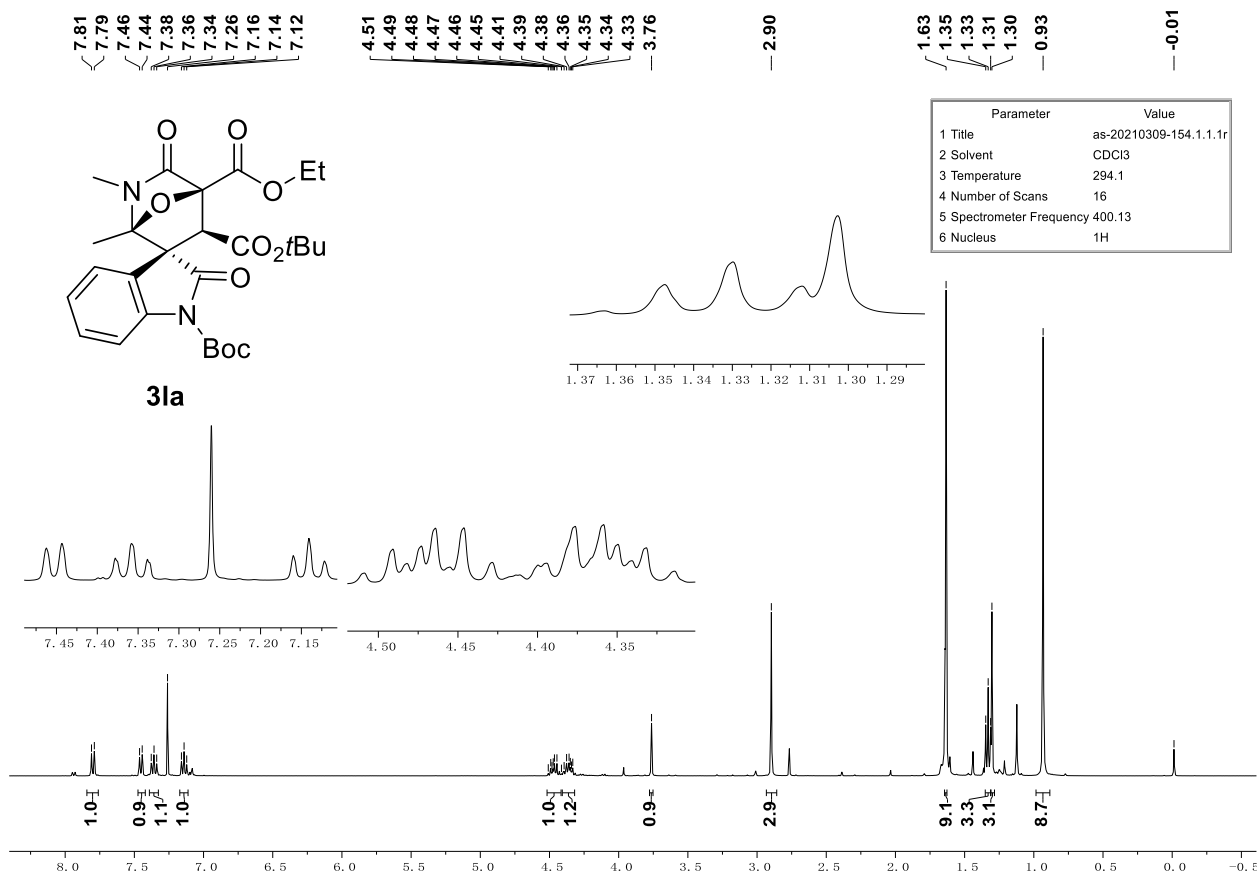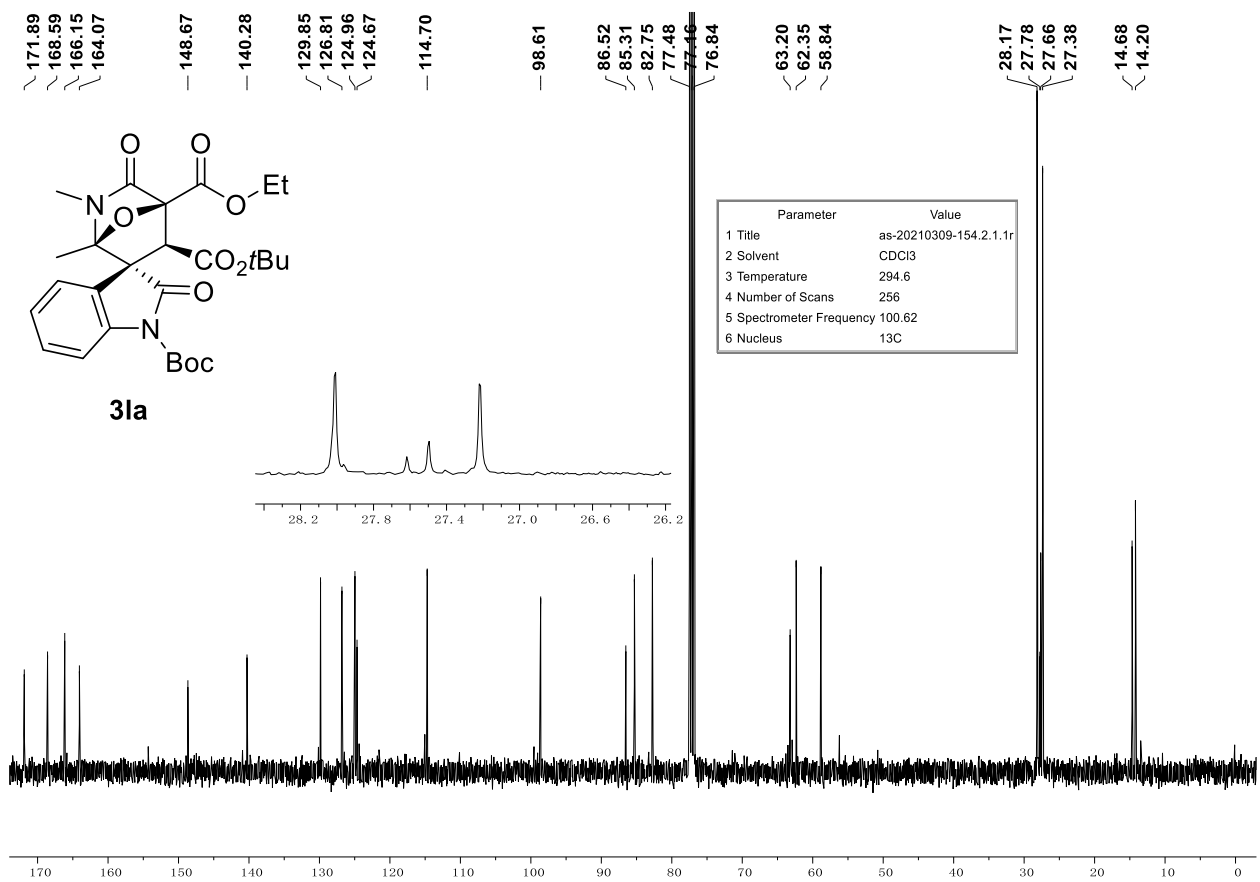

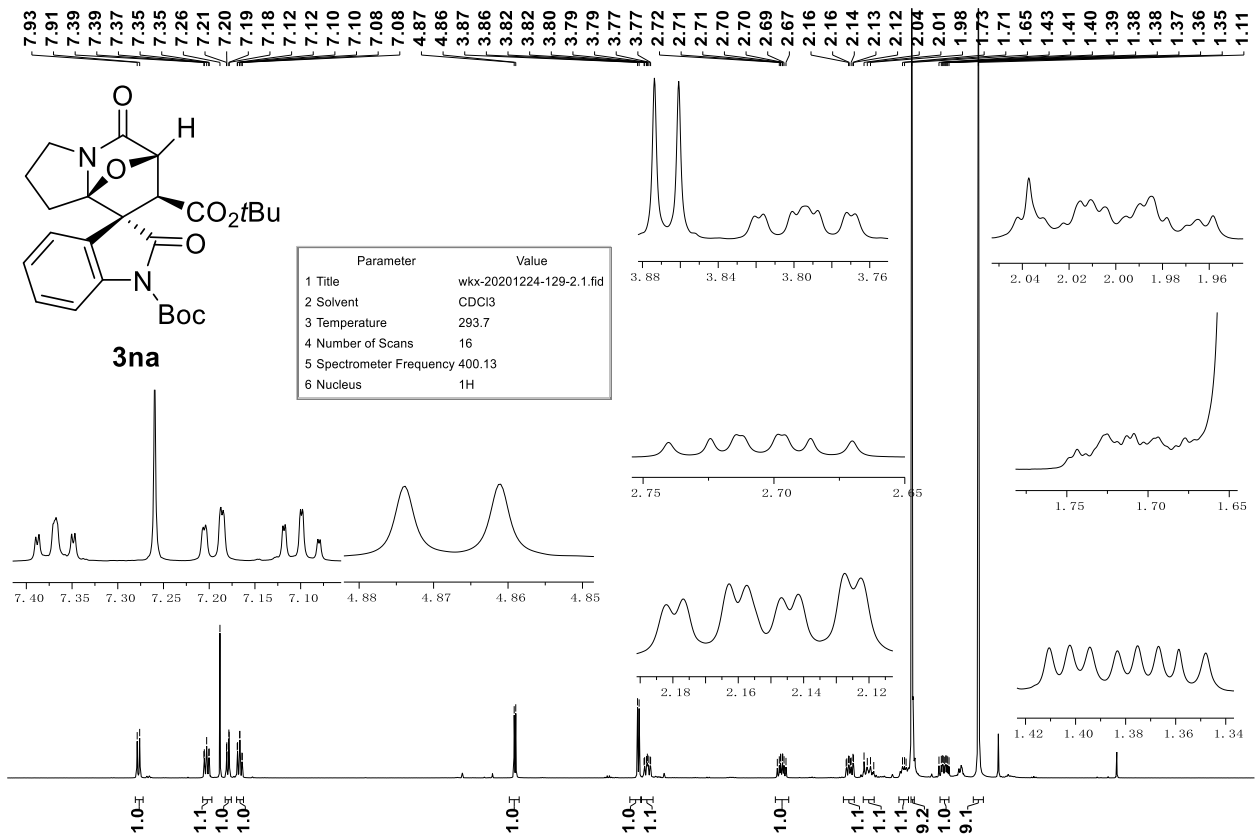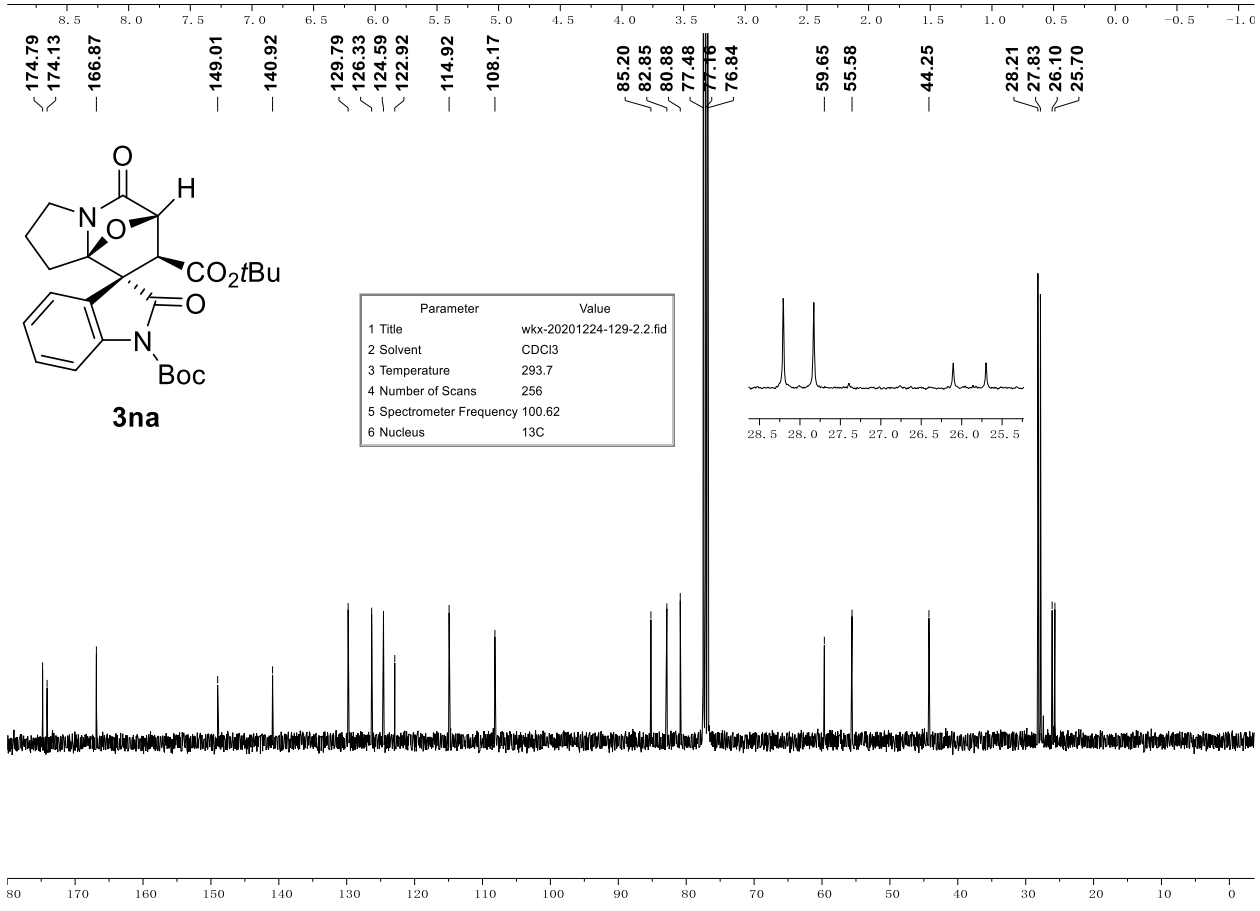



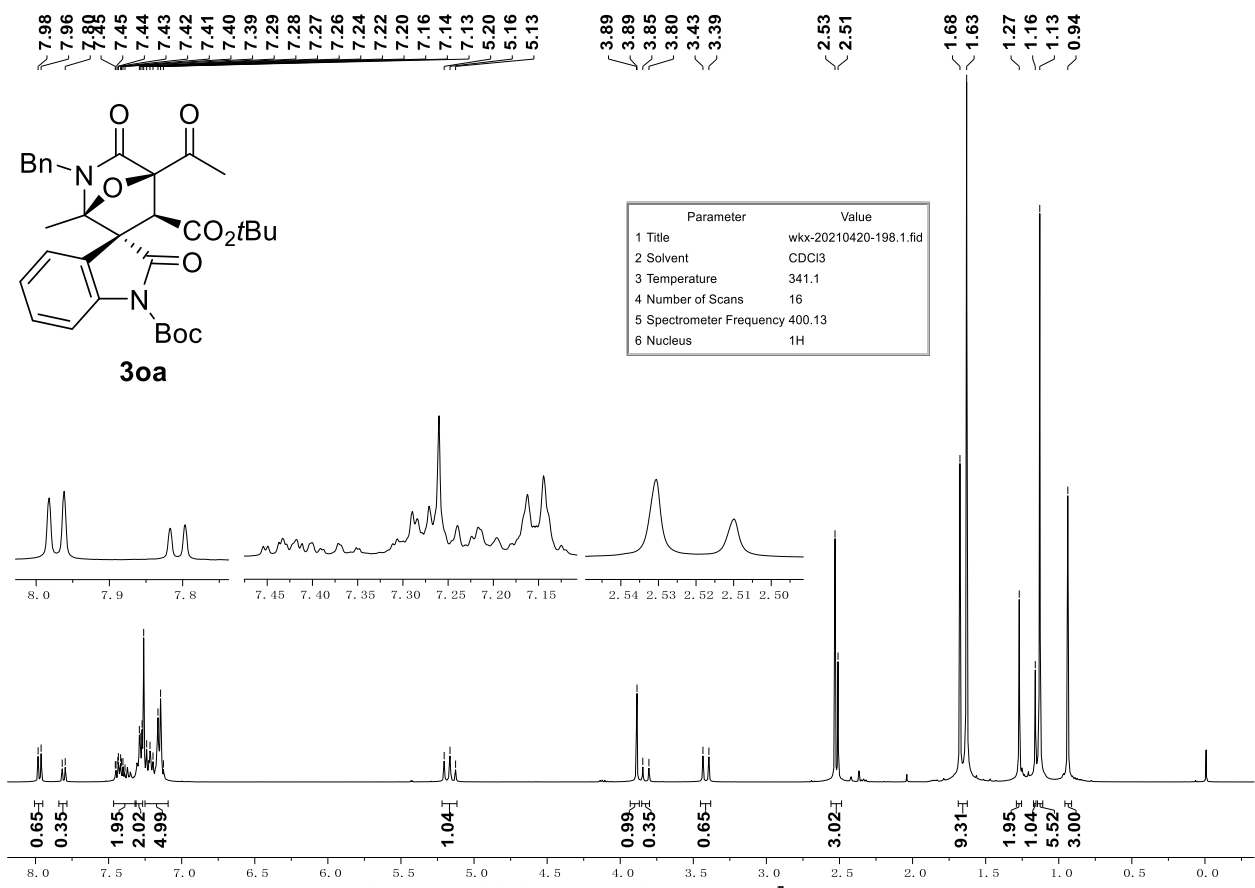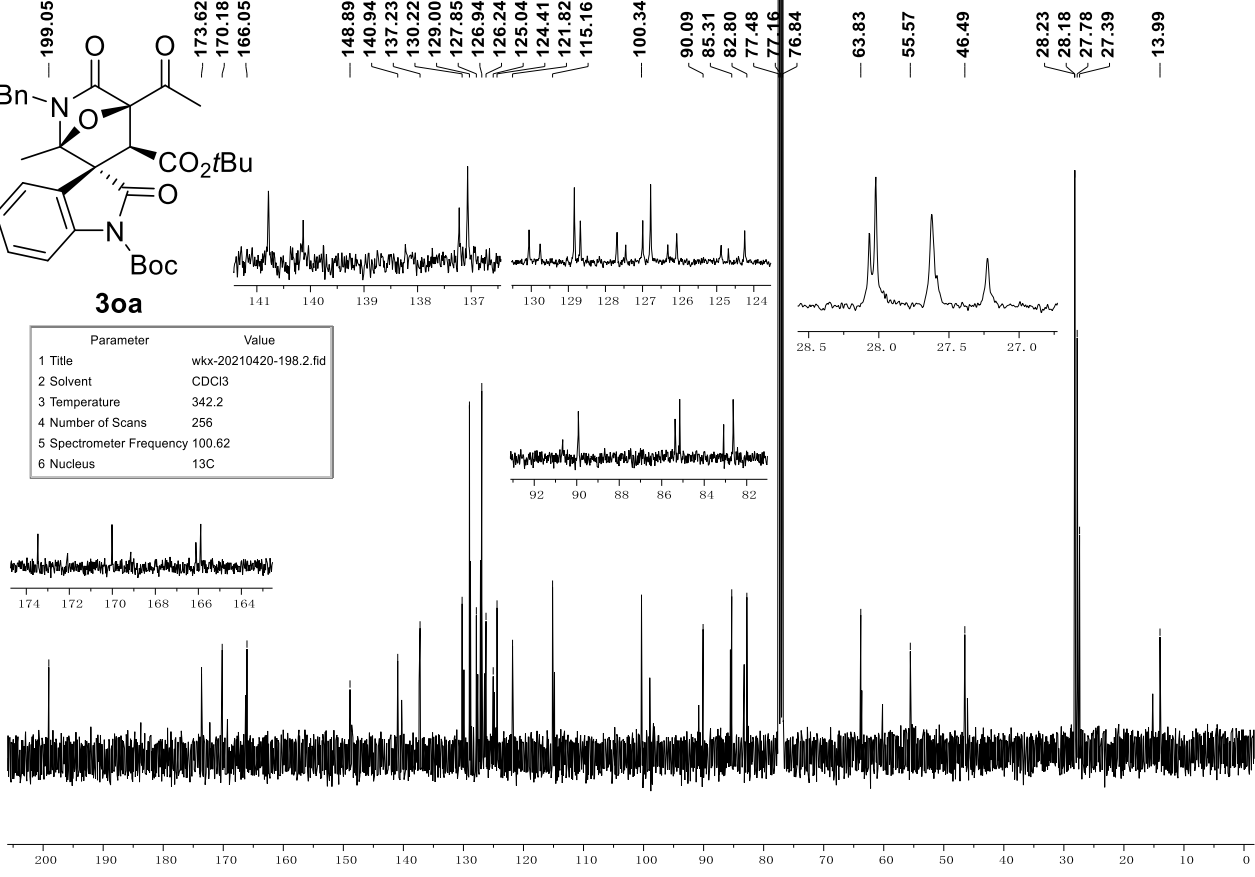

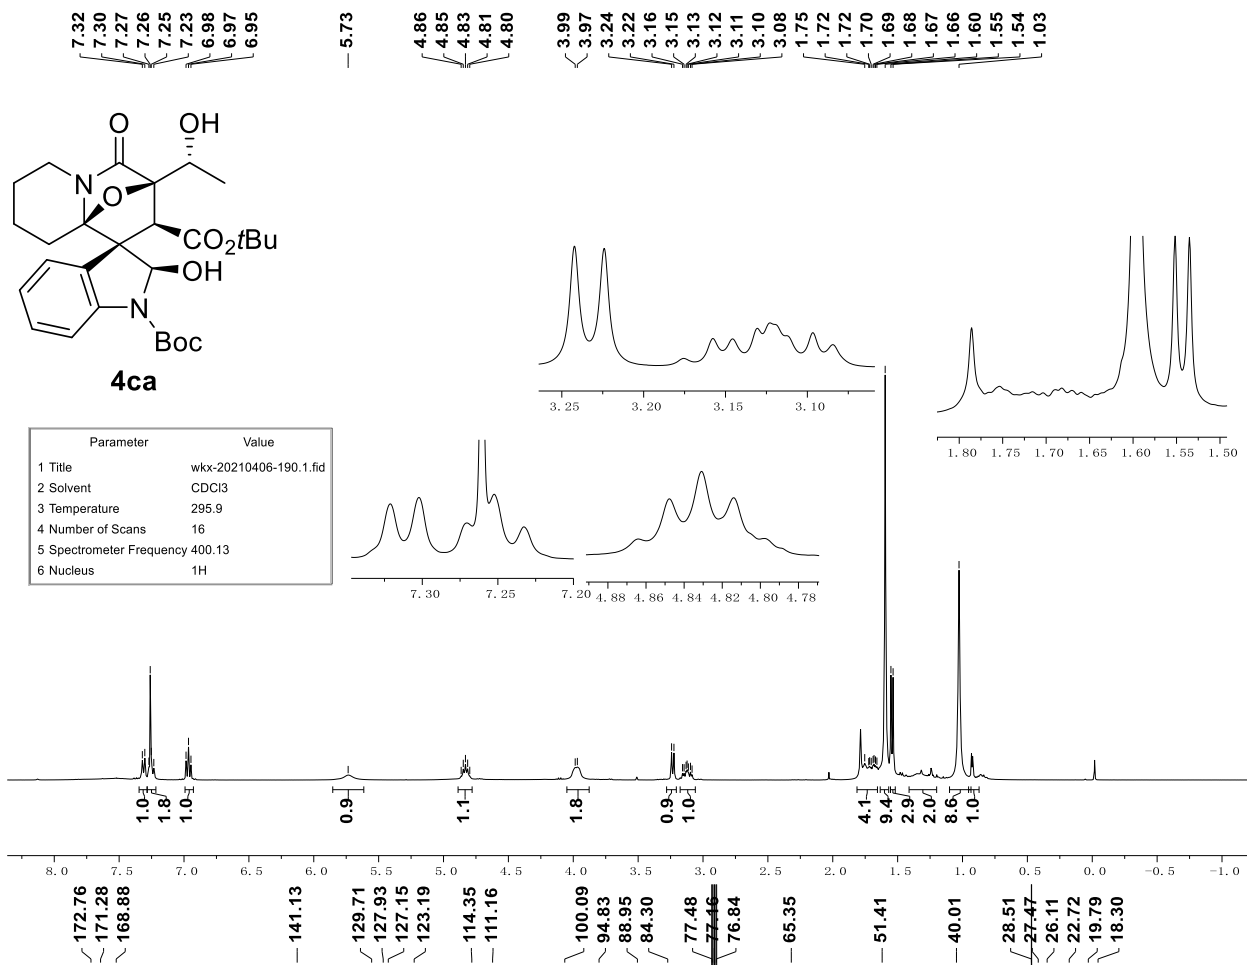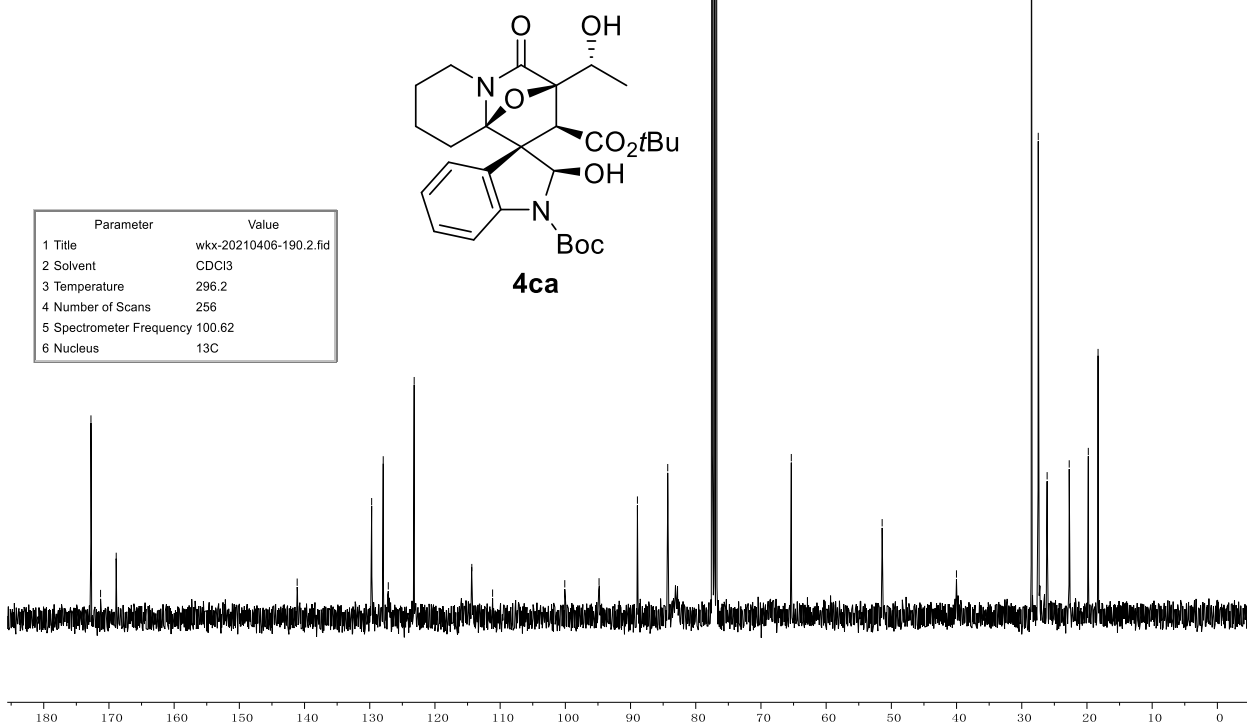

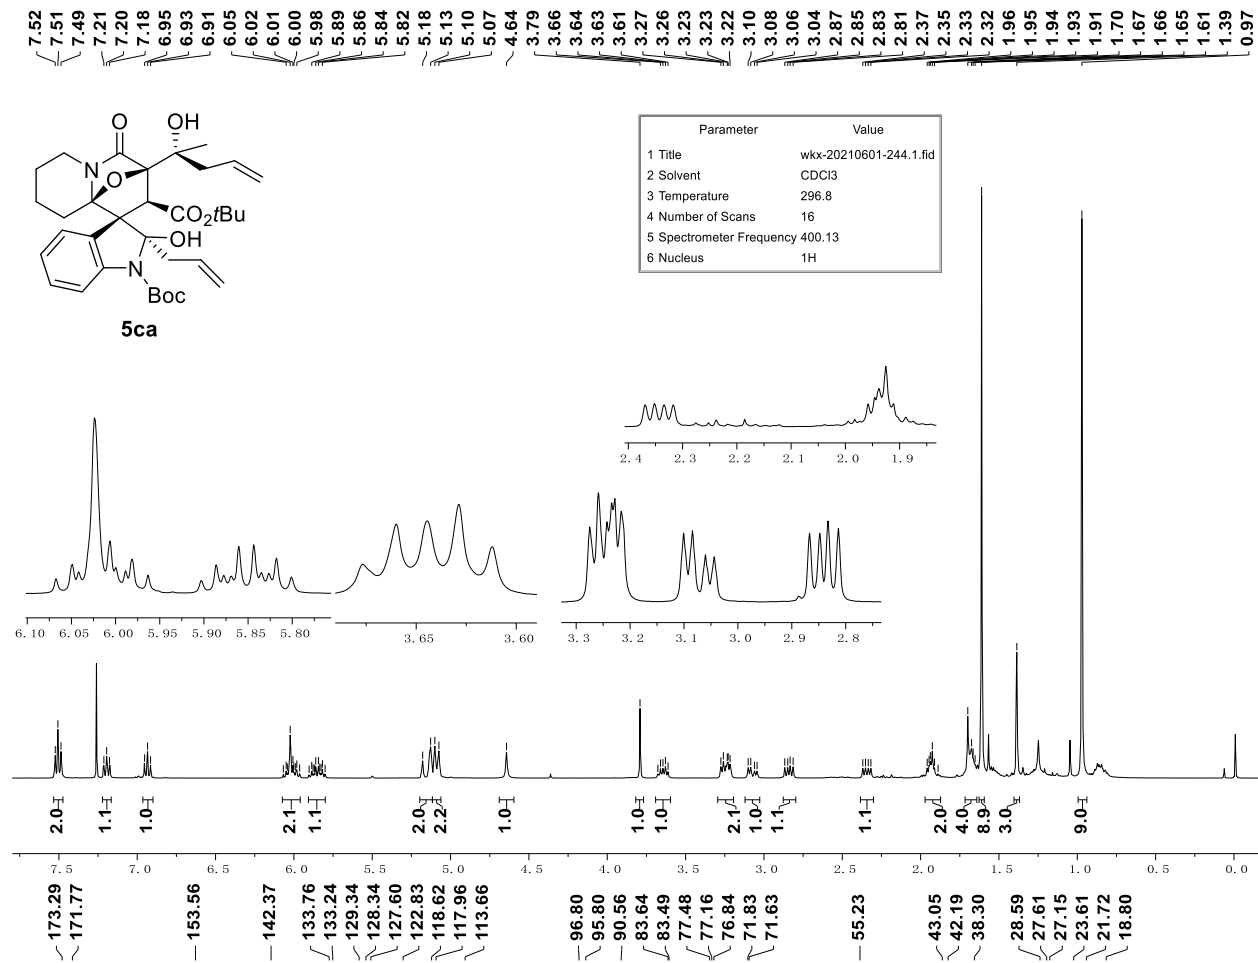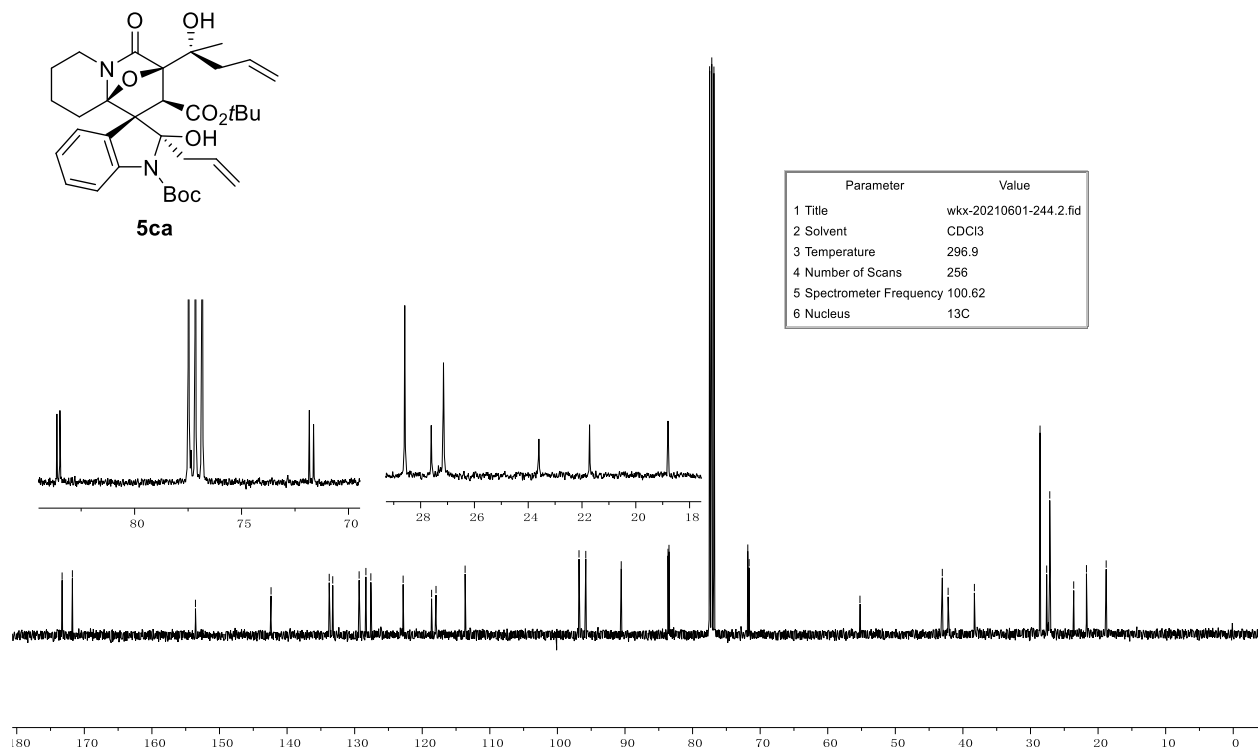

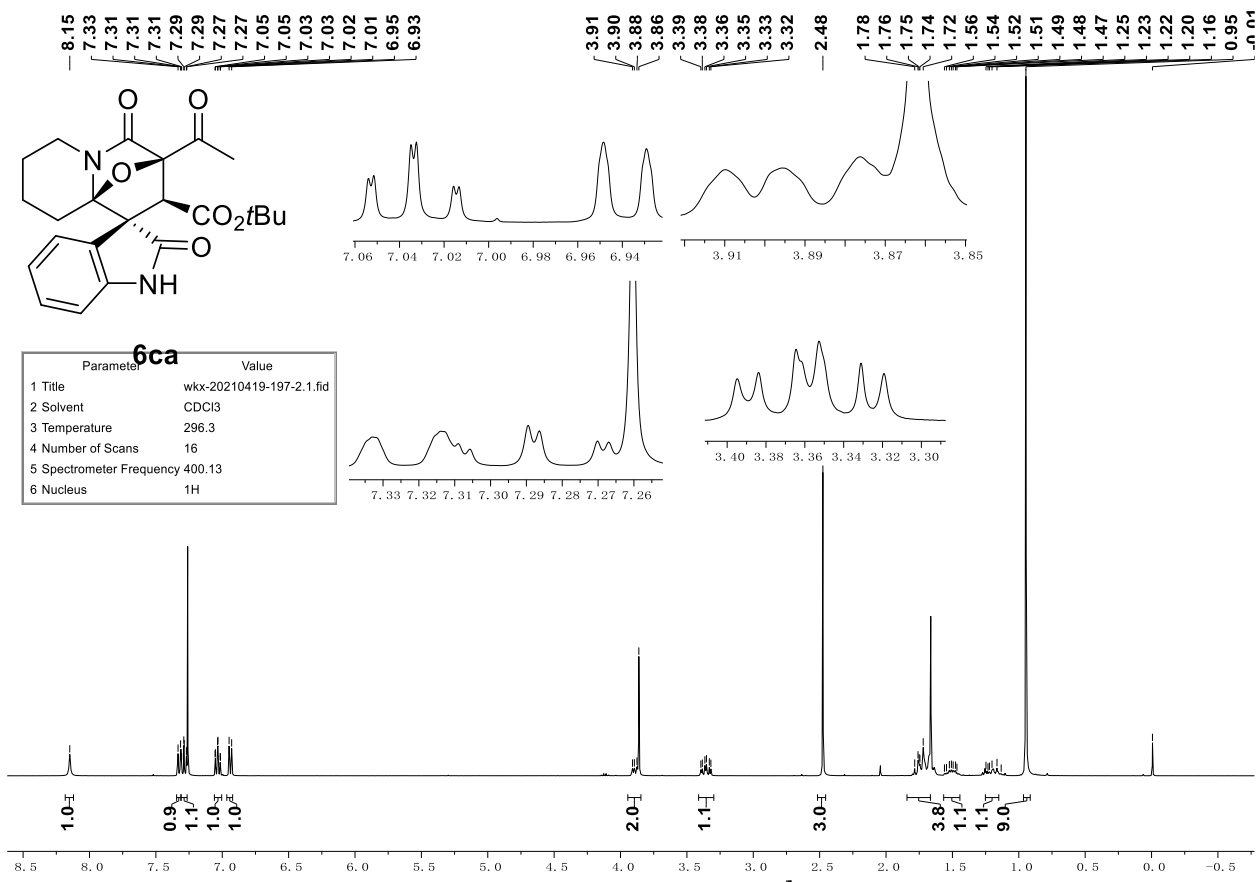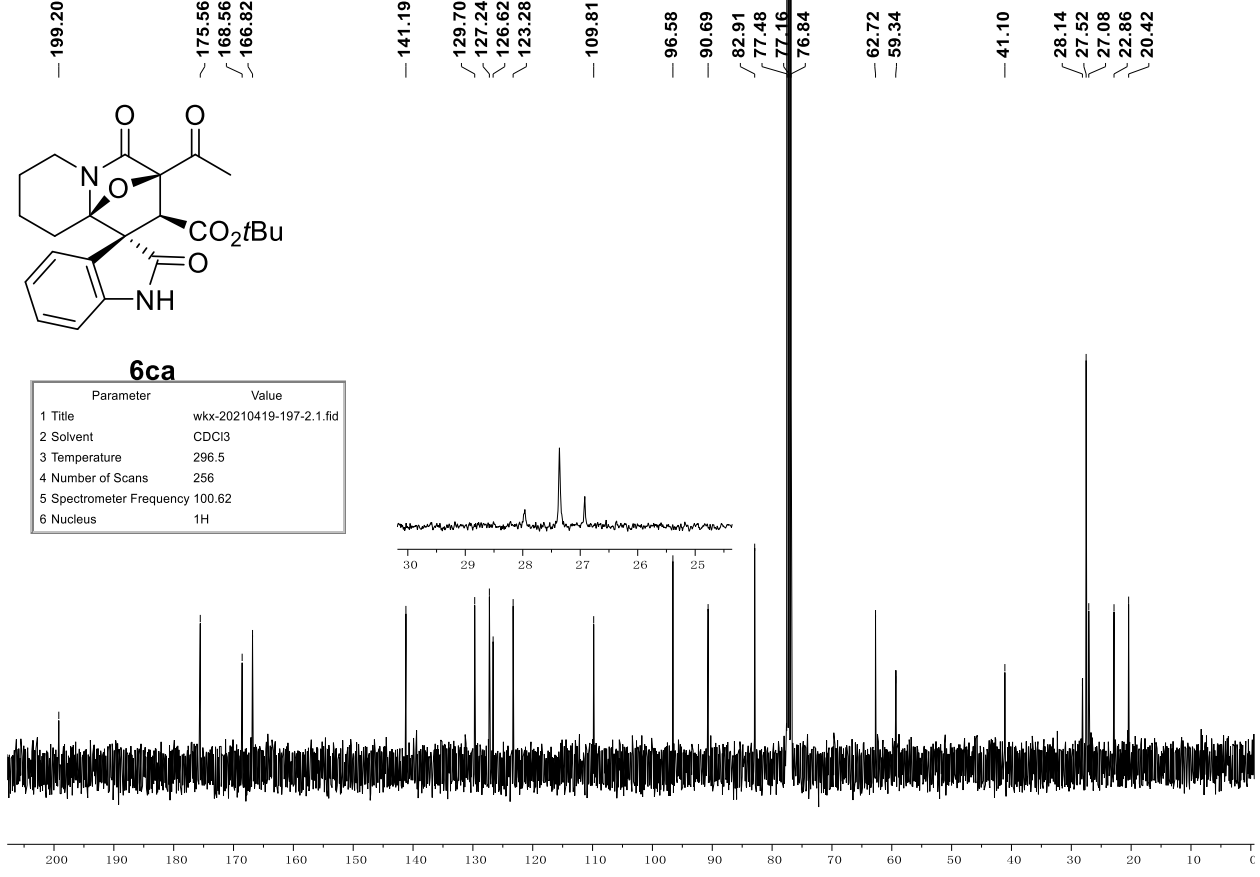

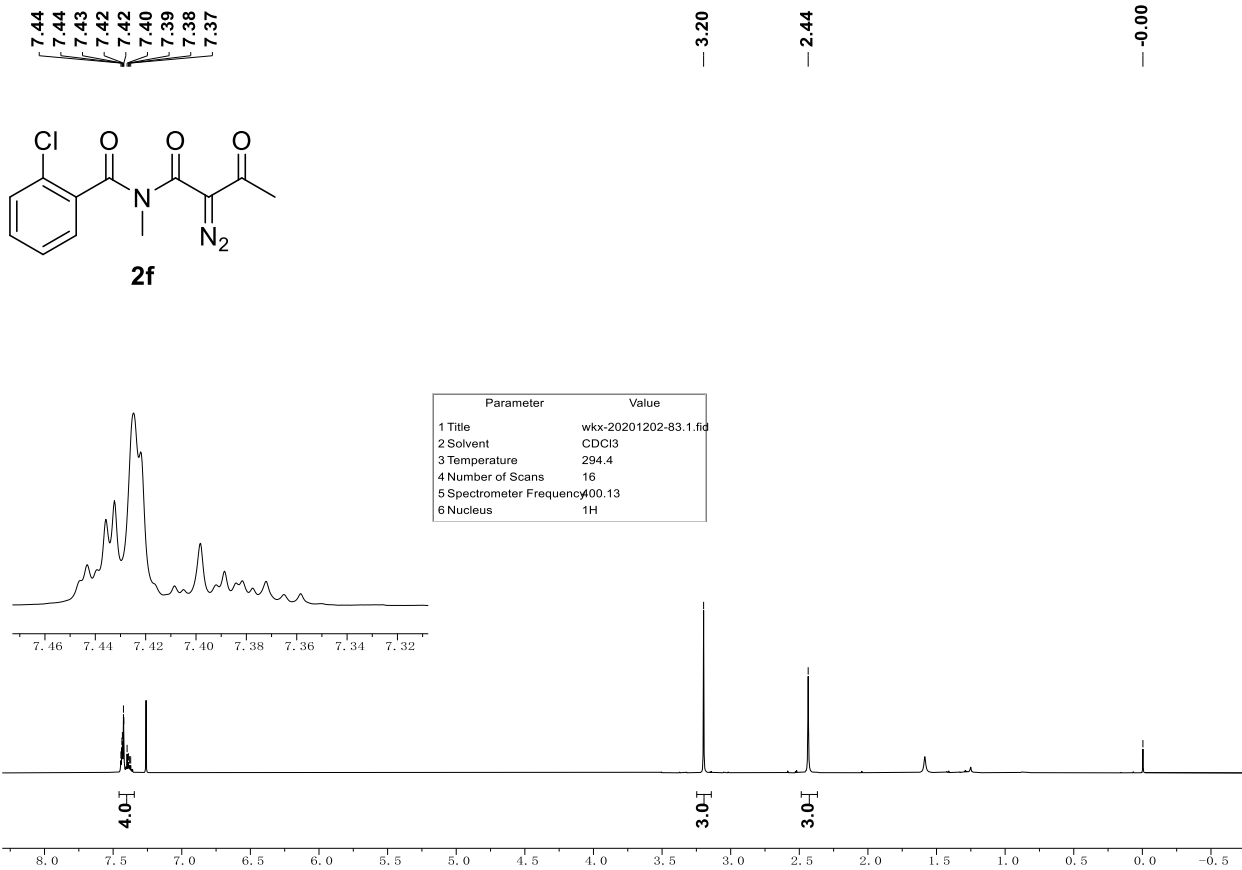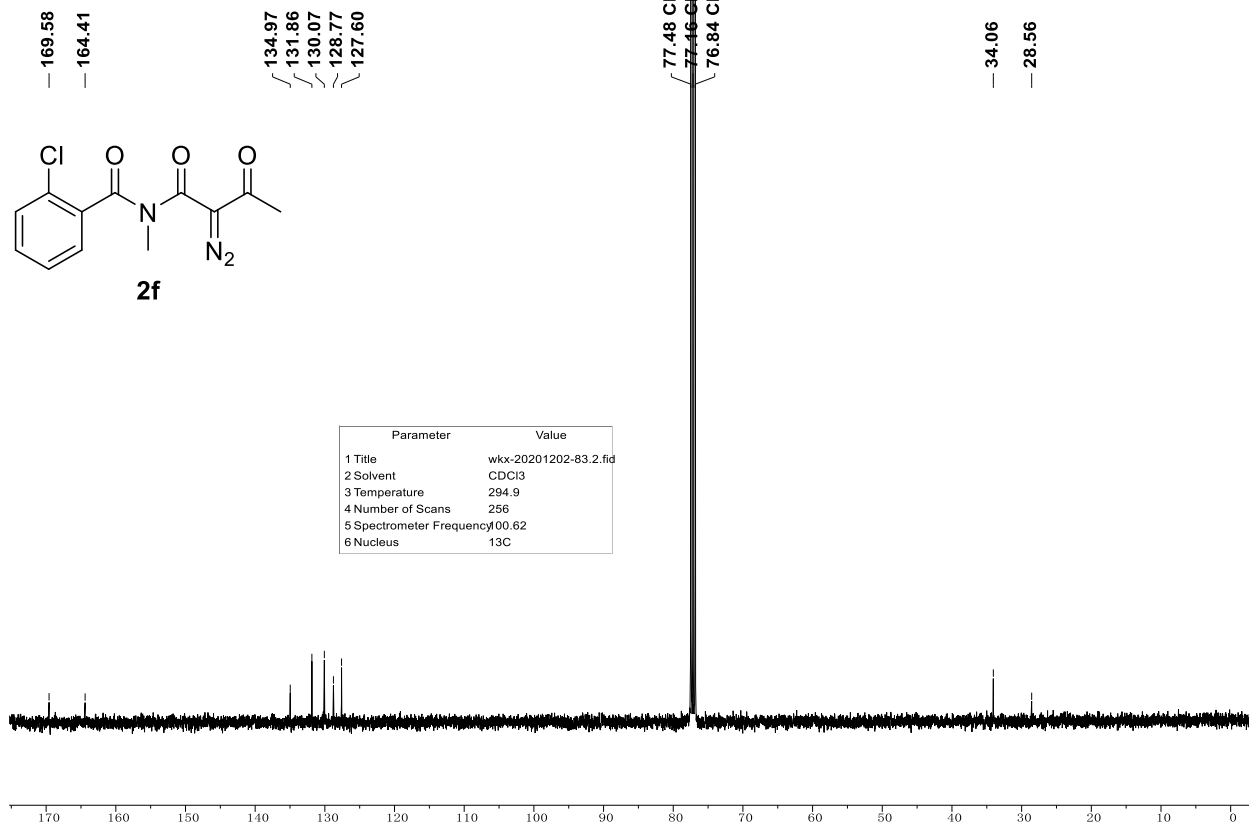

7.47  
7.37  
7.36  
7.35  
7.35  
7.26  
7.26  
7.24  
7.23

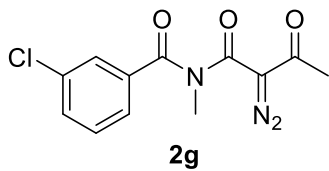

3.16

2.10

| Parameter                | Value                      |
|--------------------------|----------------------------|
| 1 Title                  | wangkx-22052021-219.1.1.1r |
| 2 Solvent                | CDCl3                      |
| 3 Temperature            | 294.1                      |
| 4 Number of Scans        | 16                         |
| 5 Spectrometer Frequency | 600.17                     |
| 6 Nucleus                | 1H                         |

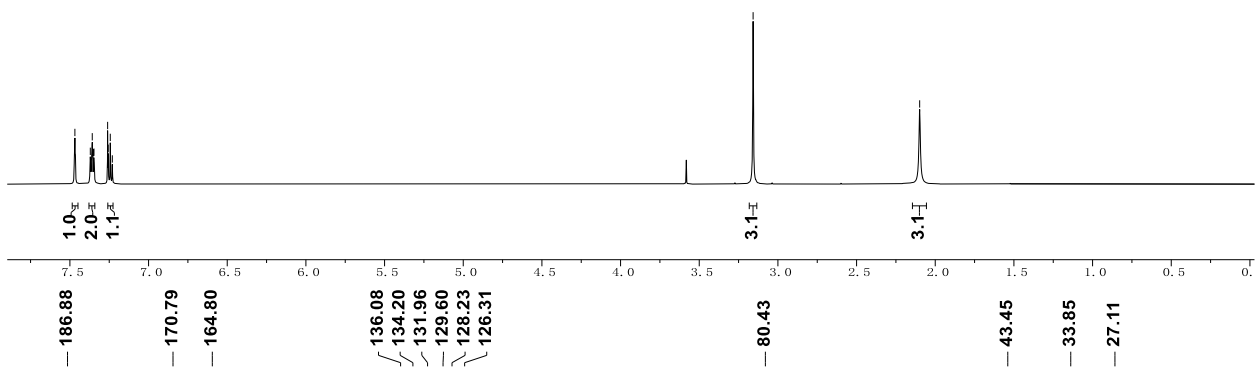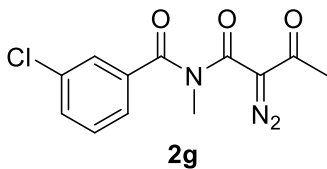

| Parameter                | Value                      |
|--------------------------|----------------------------|
| 1 Title                  | wangkx-22052021-219.2.1.1r |
| 2 Solvent                | CDCl3                      |
| 3 Temperature            | 295.0                      |
| 4 Number of Scans        | 256                        |
| 5 Spectrometer Frequency | 150.91                     |
| 6 Nucleus                | 13C                        |

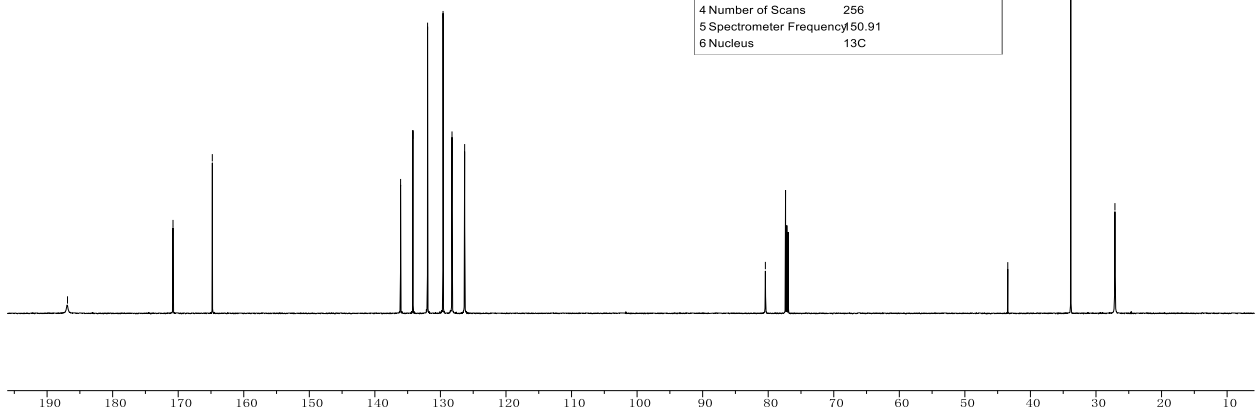

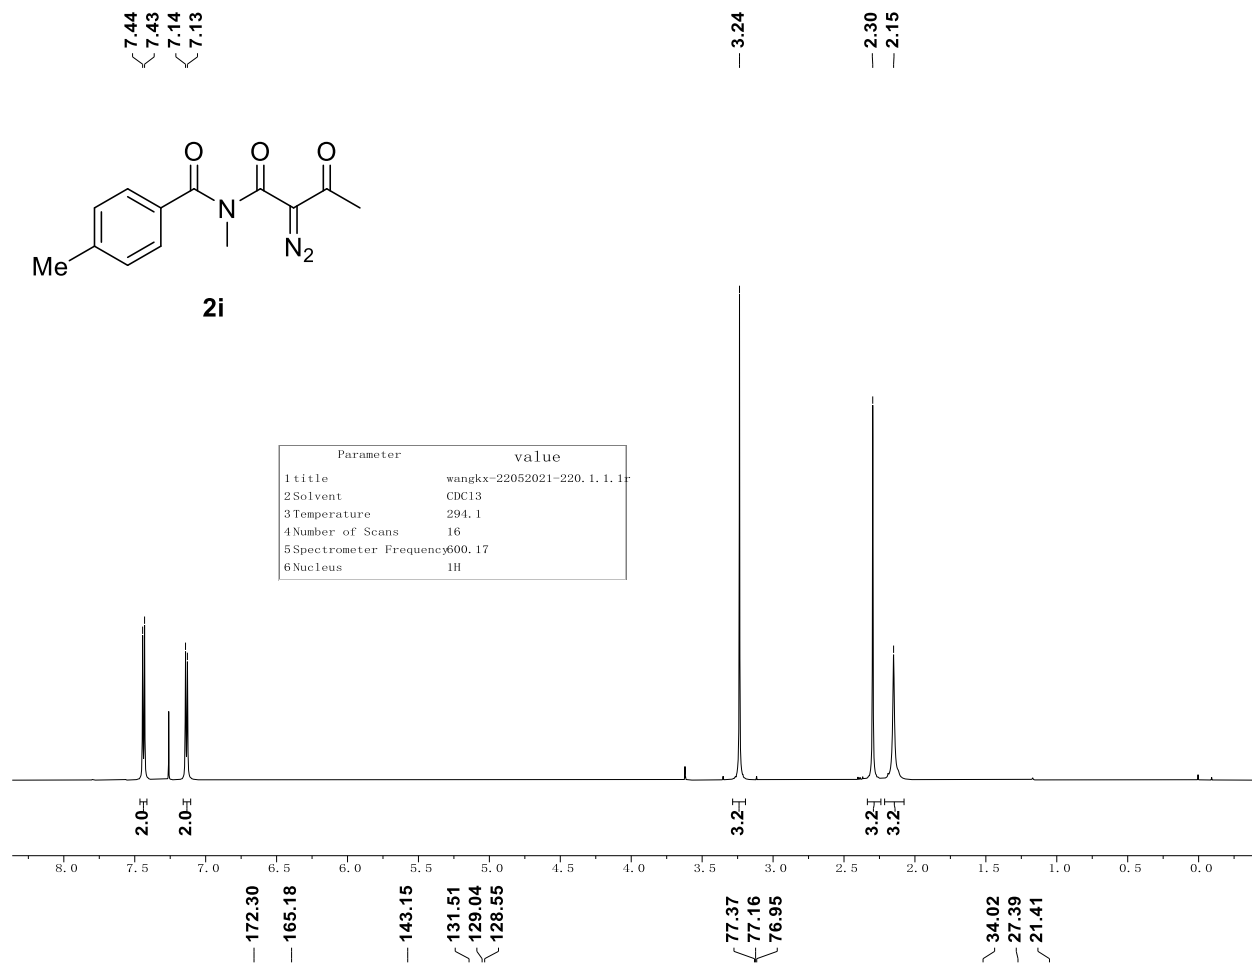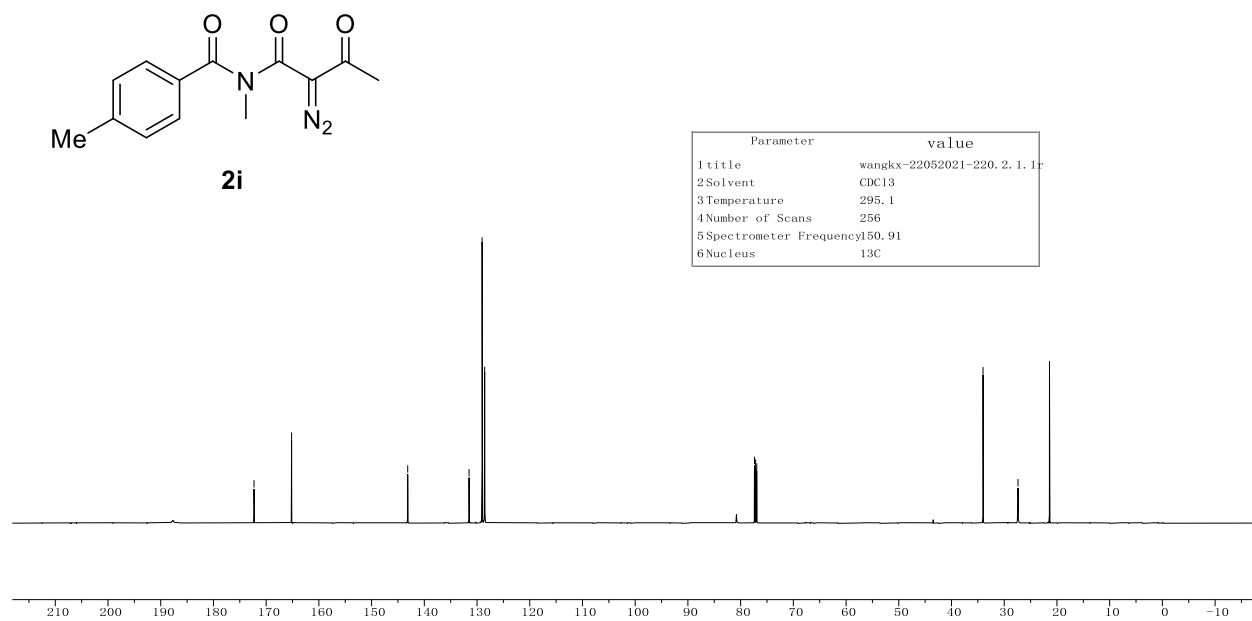

8.15  
7.89  
7.87  
7.86  
7.85  
7.84  
7.66  
7.65  
7.64  
7.64  
7.58  
7.58  
7.57  
7.57  
7.56  
7.56  
7.54  
7.54  
7.53  
7.53  
7.52  
7.51  
7.26

3.38

2.17

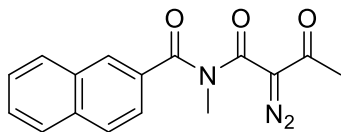

2k

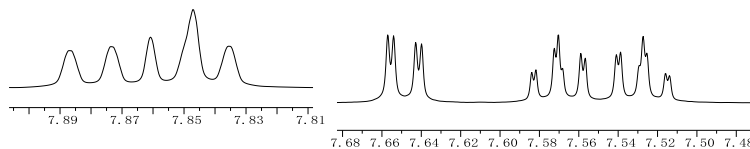

| Parameter                | Value                      |
|--------------------------|----------------------------|
| 1 Title                  | wangkx-22052021-222.1.1.1r |
| 2 Solvent                | CDCl3                      |
| 3 Temperature            | 293.9                      |
| 4 Number of Scans        | 16                         |
| 5 Spectrometer Frequency | 600.17                     |
| 6 Nucleus                | 1H                         |

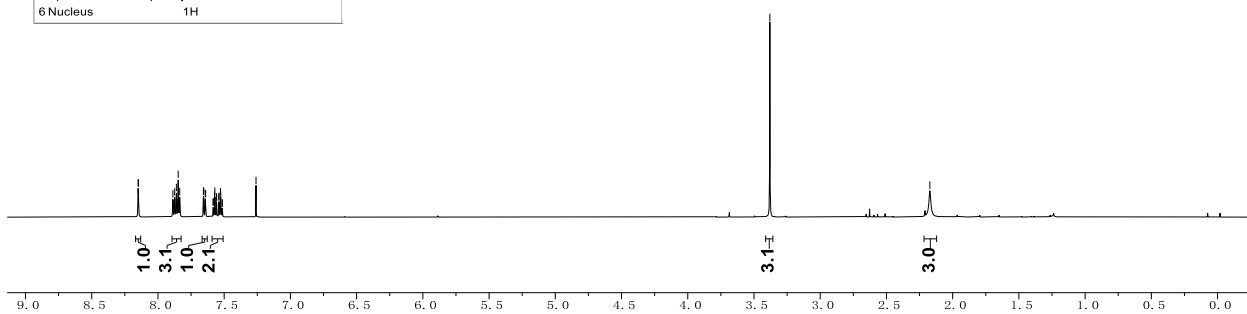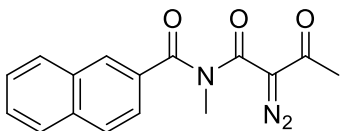

2k

| Parameter                | Value                      |
|--------------------------|----------------------------|
| 1 Title                  | wangkx-22052021-222.2.1.1r |
| 2 Solvent                | CDCl3                      |
| 3 Temperature            | 294.7                      |
| 4 Number of Scans        | 256                        |
| 5 Spectrometer Frequency | 150.91                     |
| 6 Nucleus                | 13C                        |

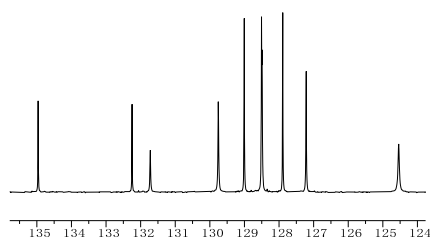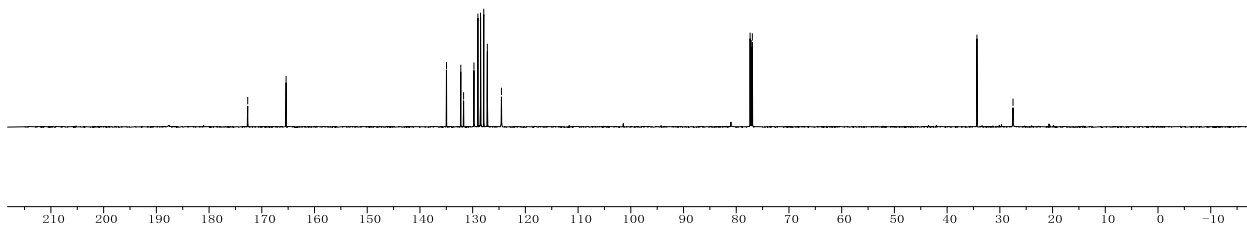



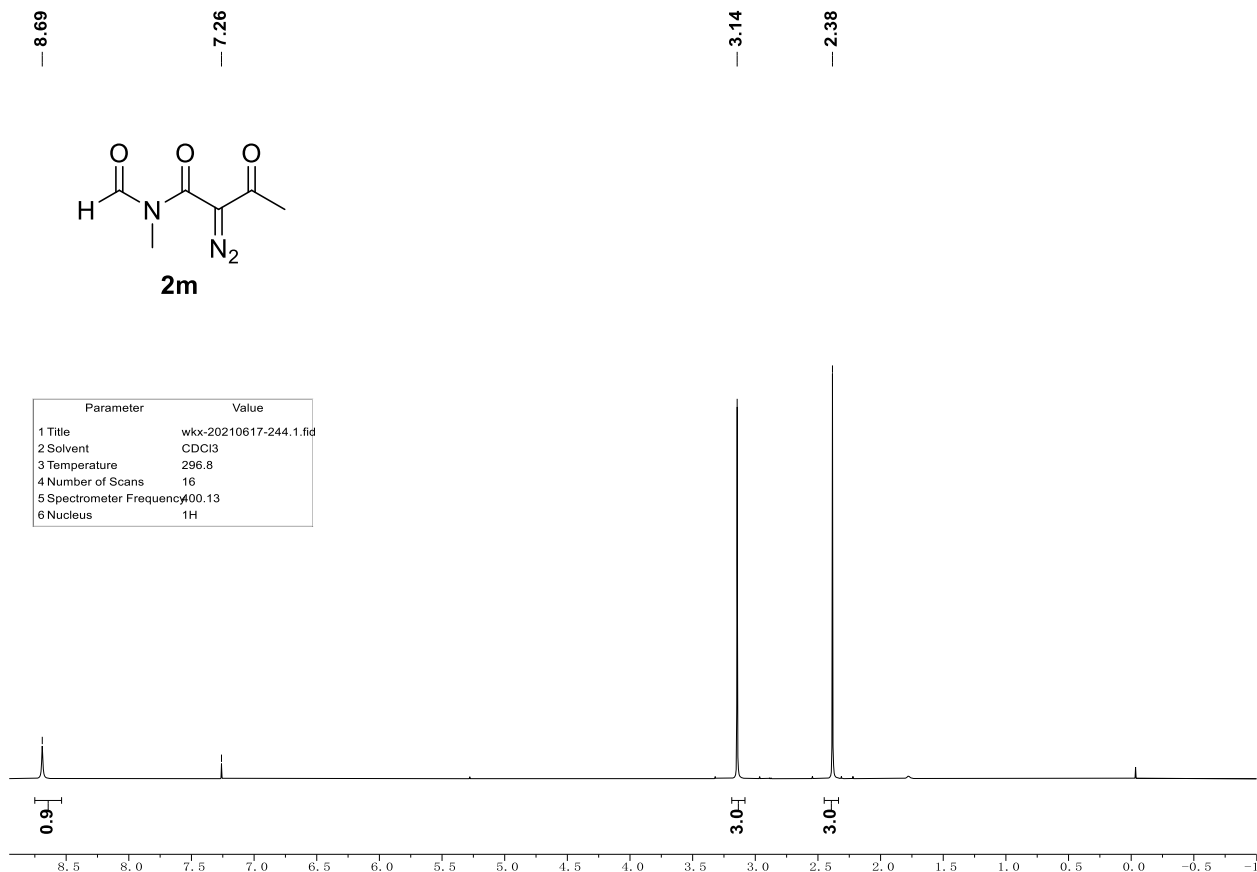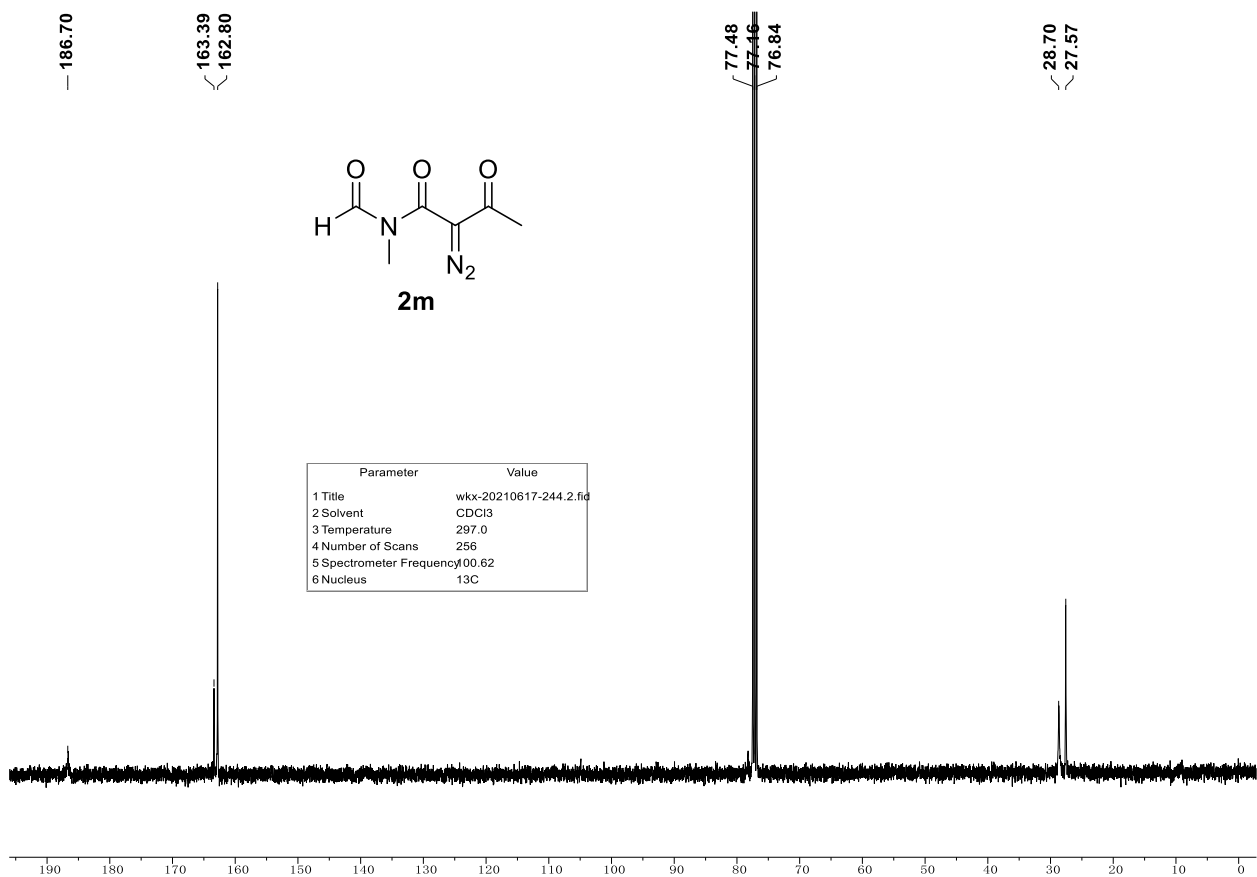

## 14. Copies of CD Spectra for the Products

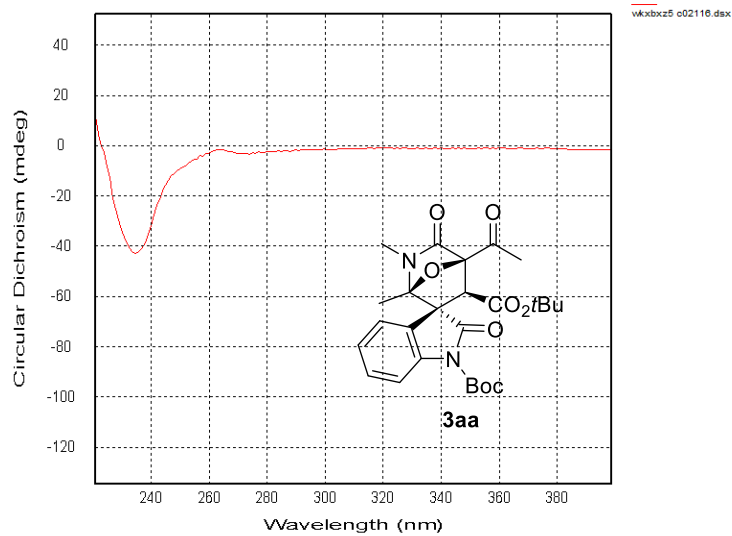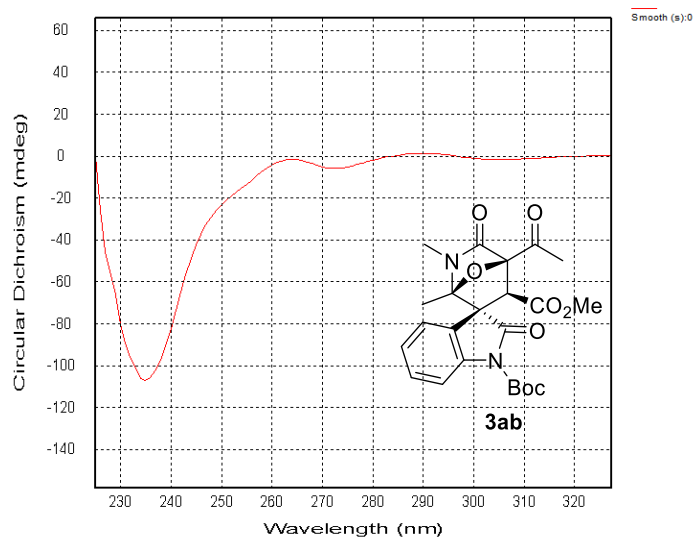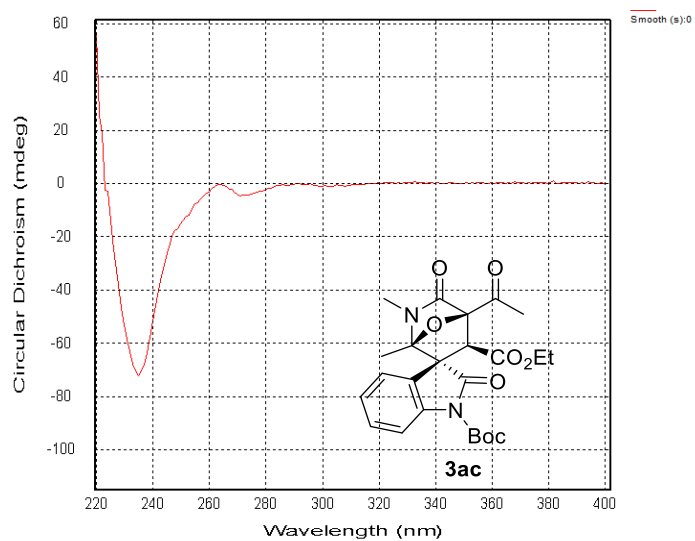

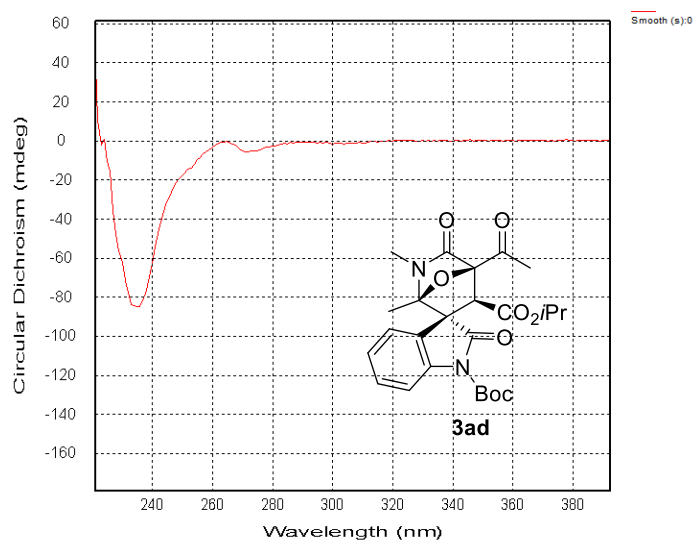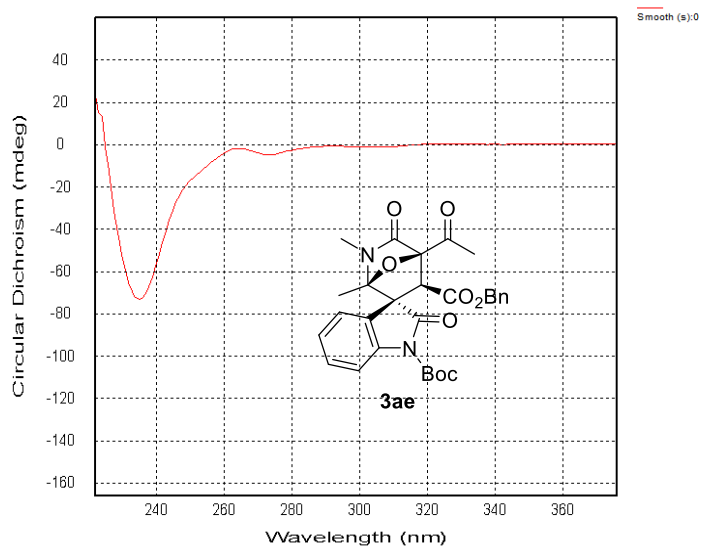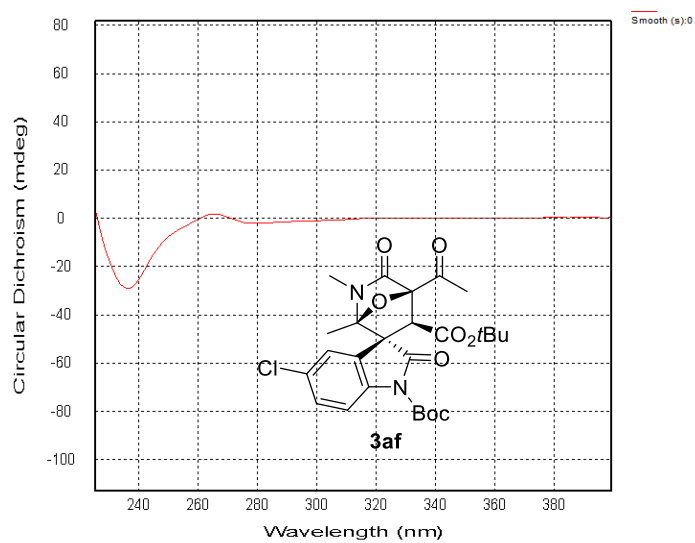

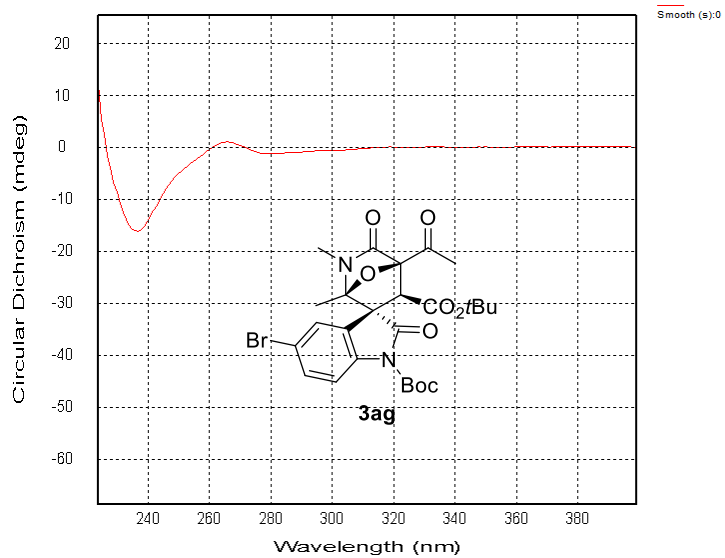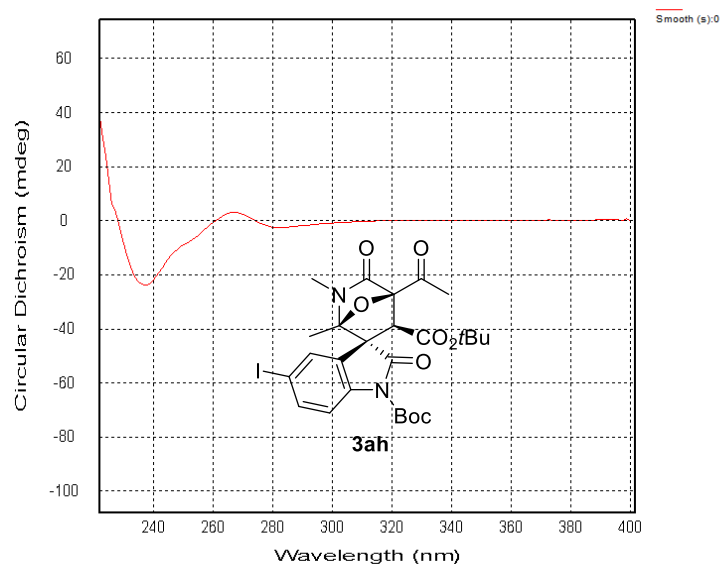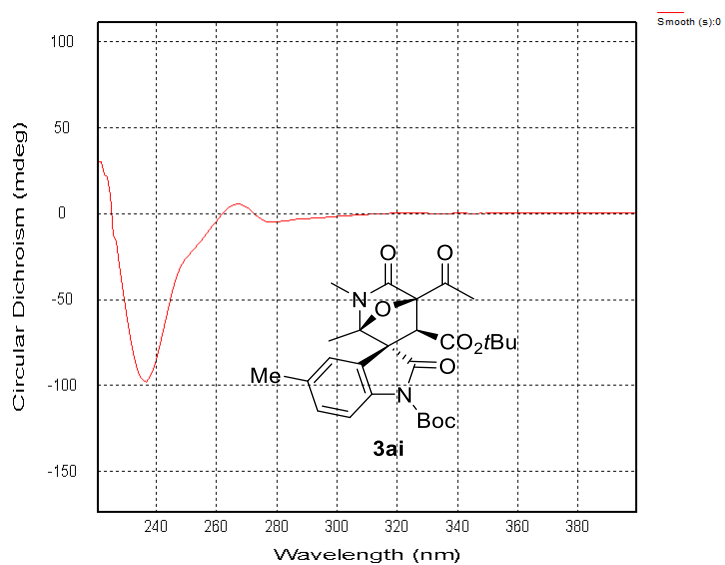

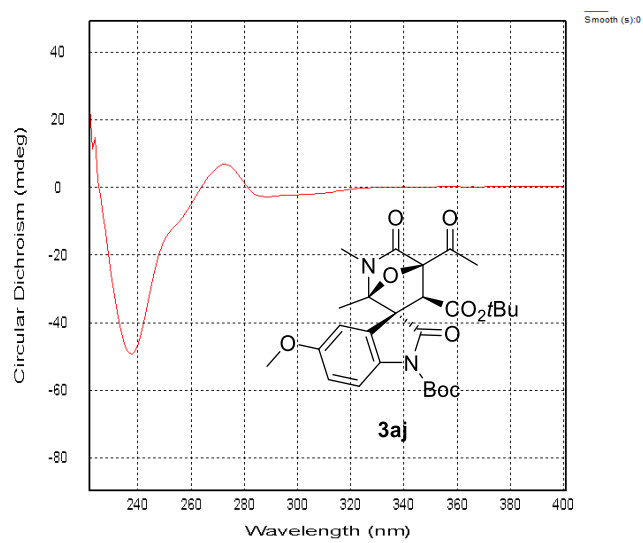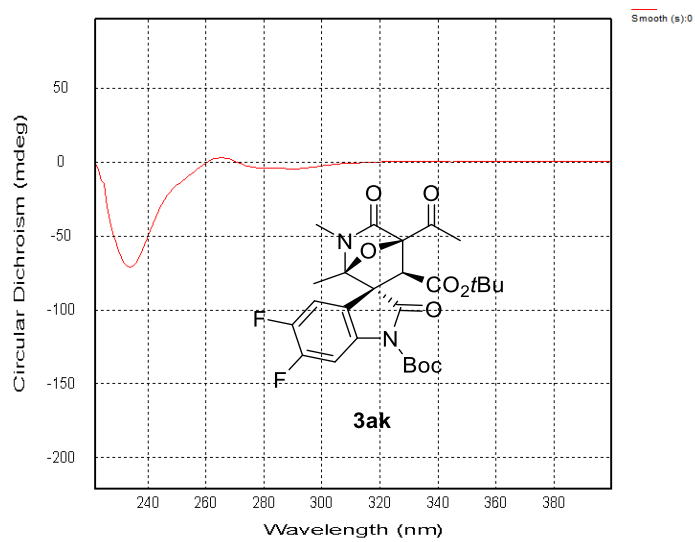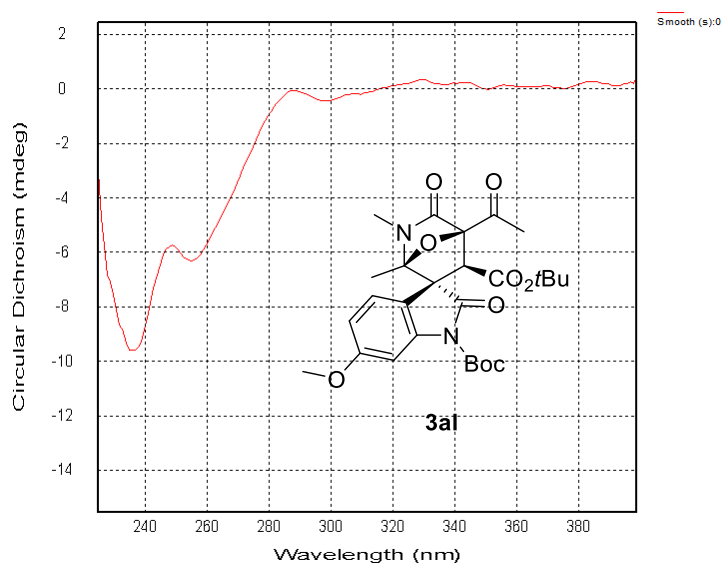

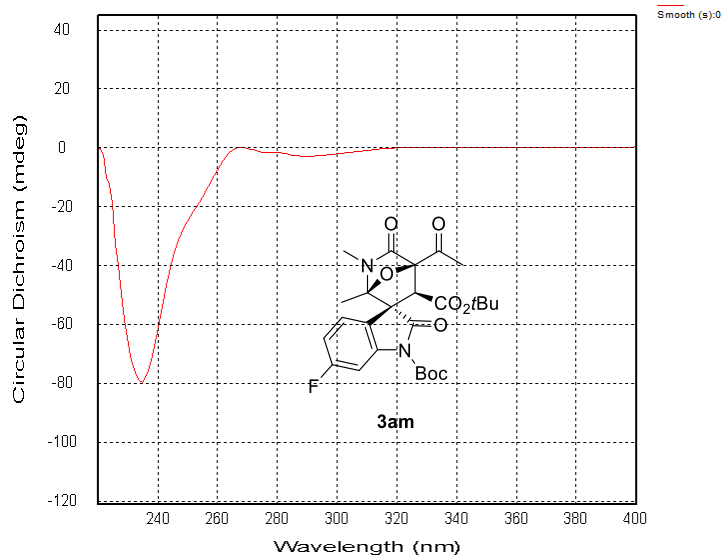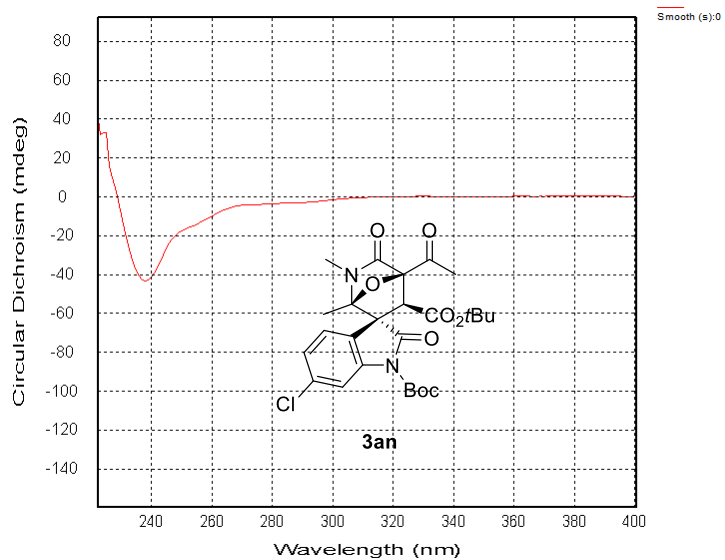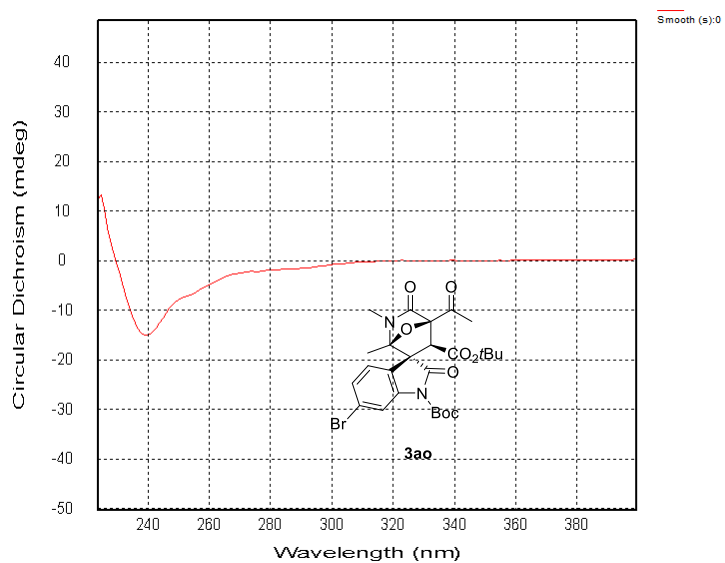

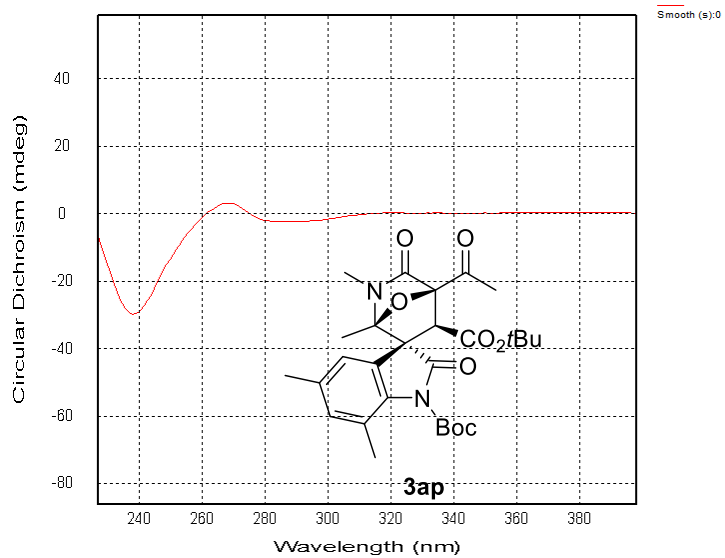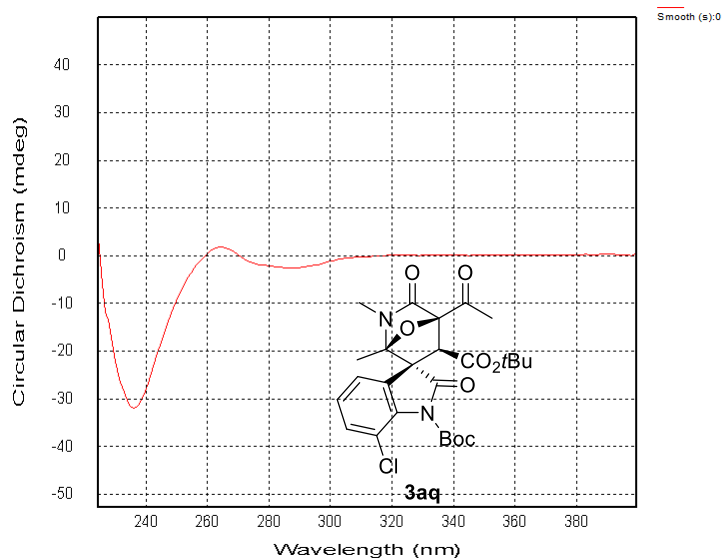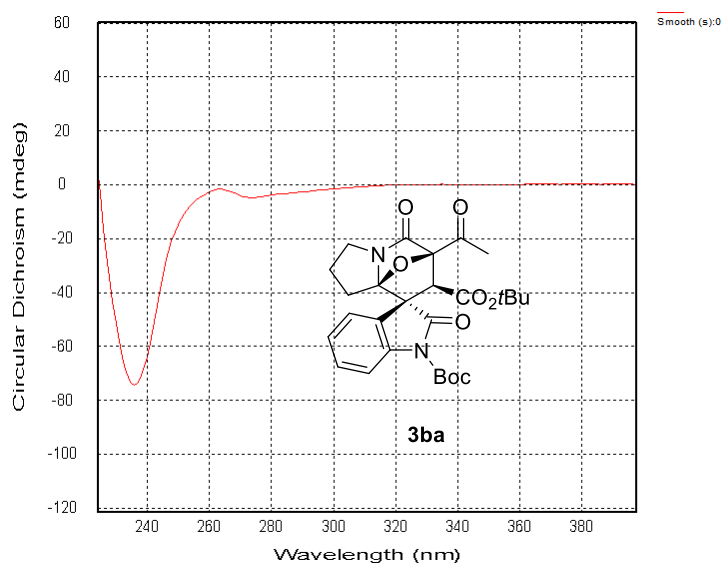

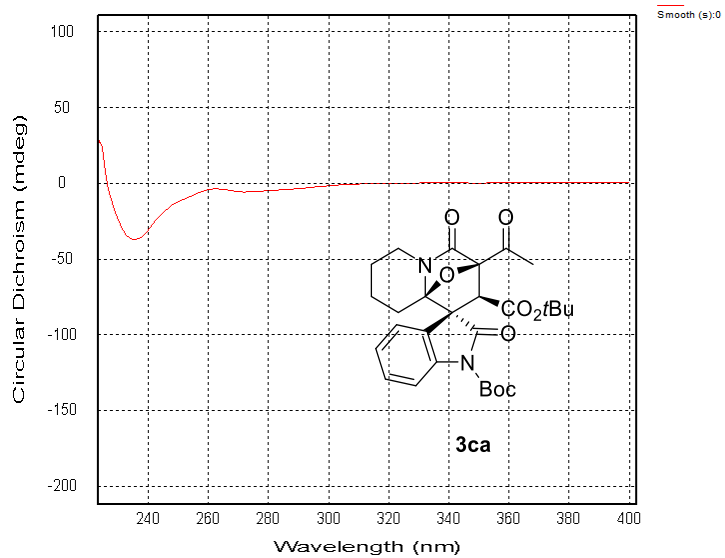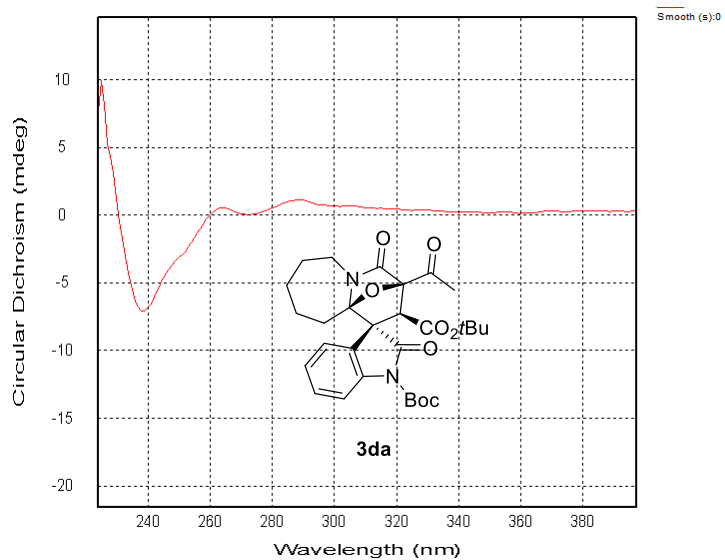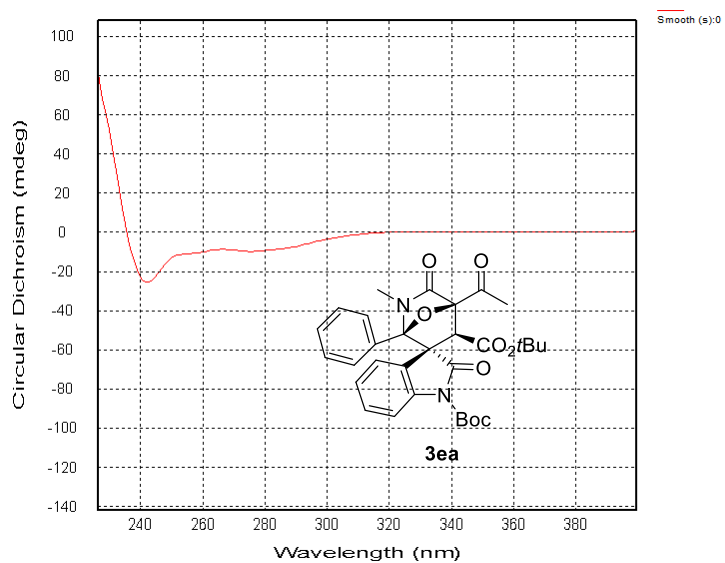



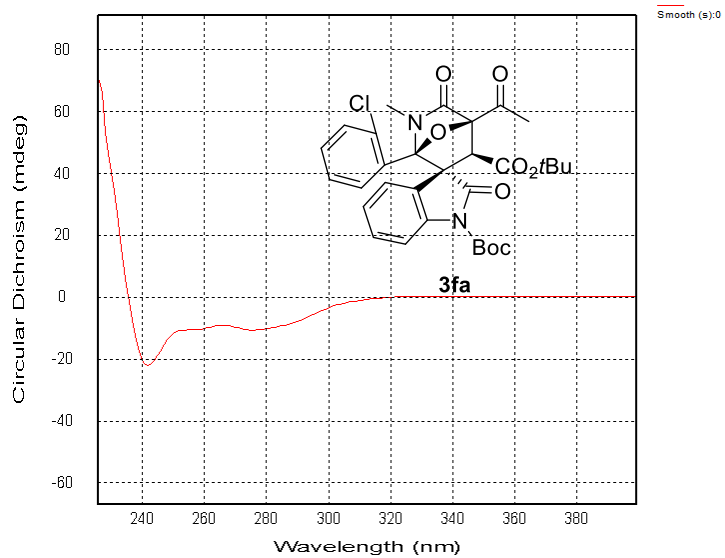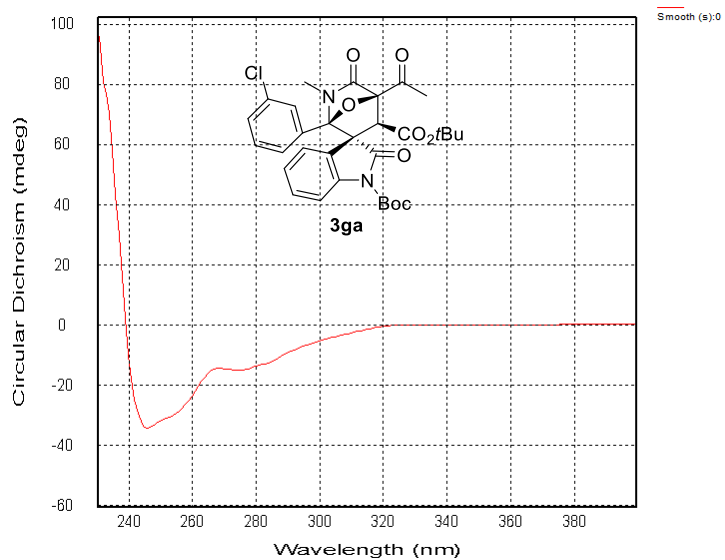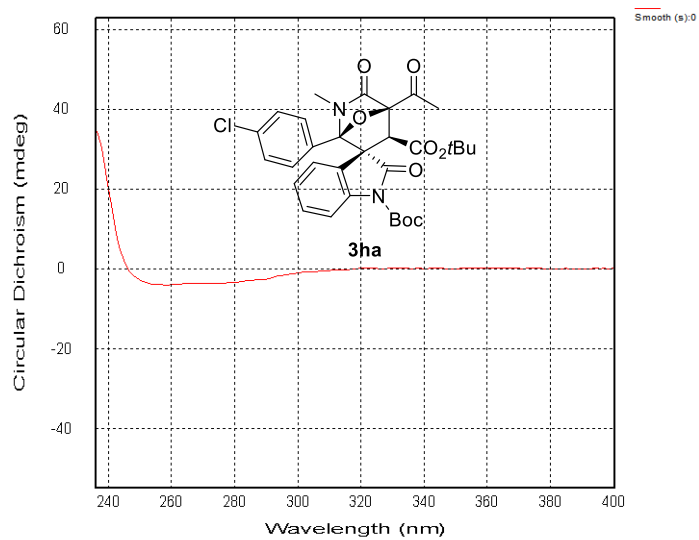

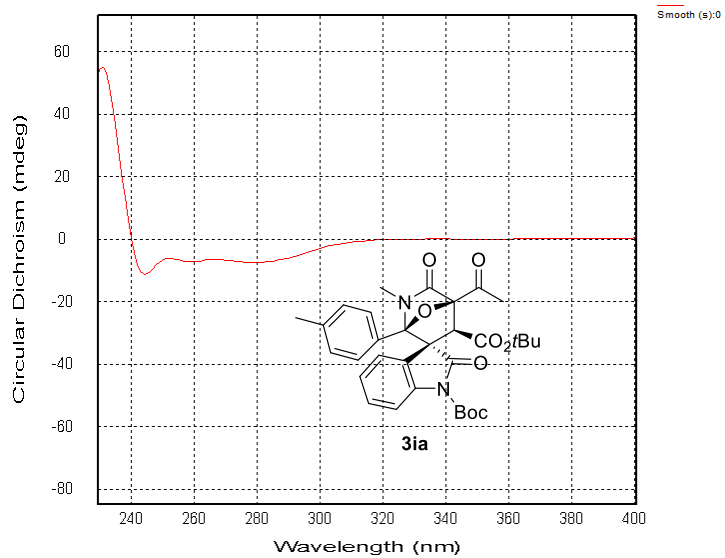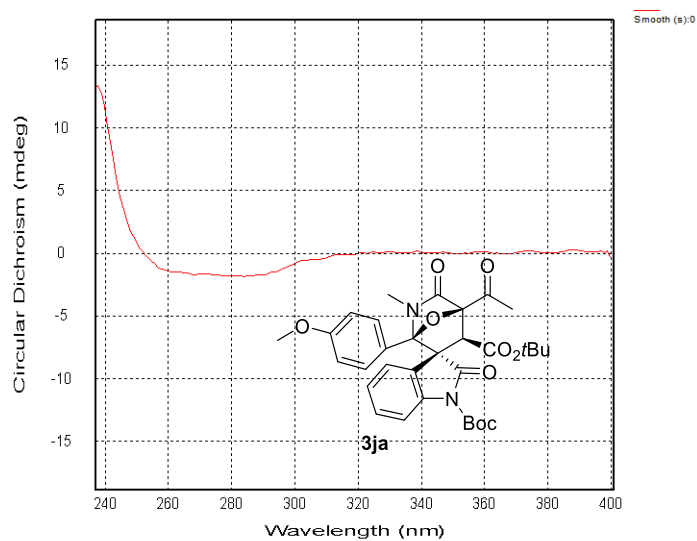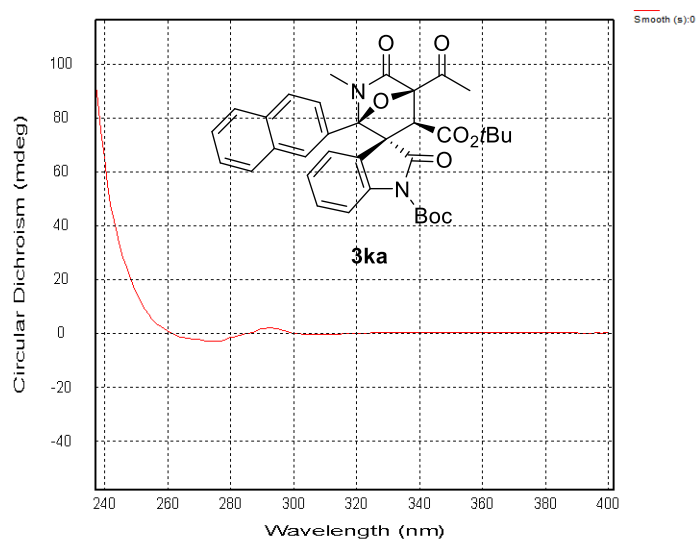

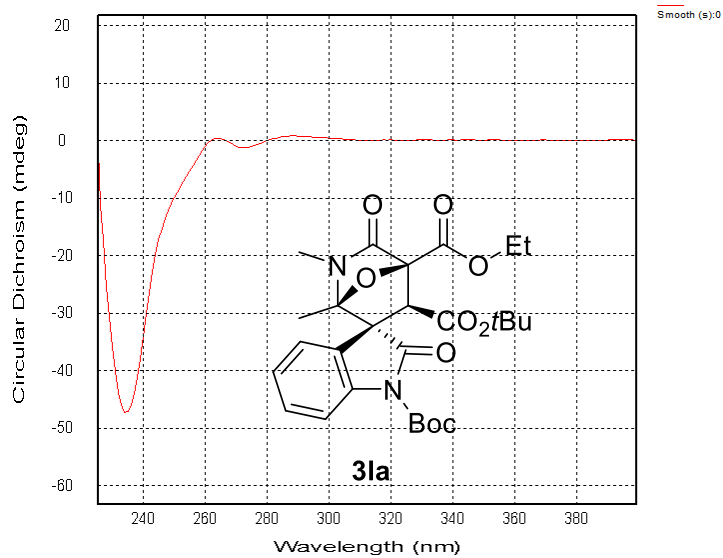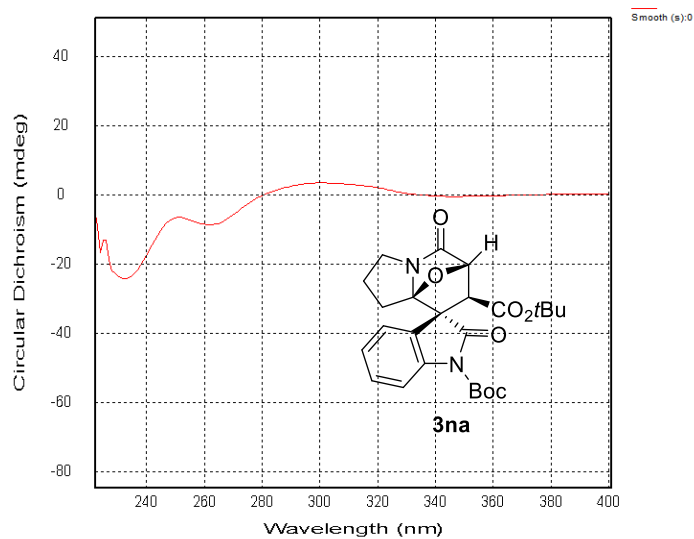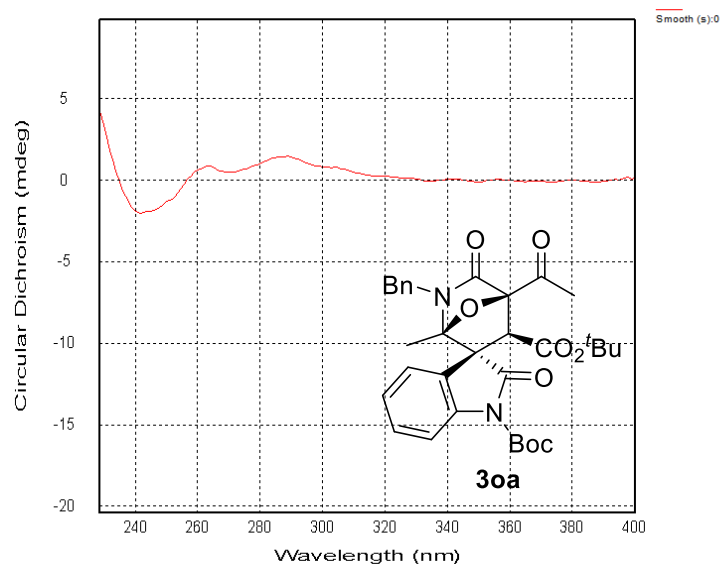

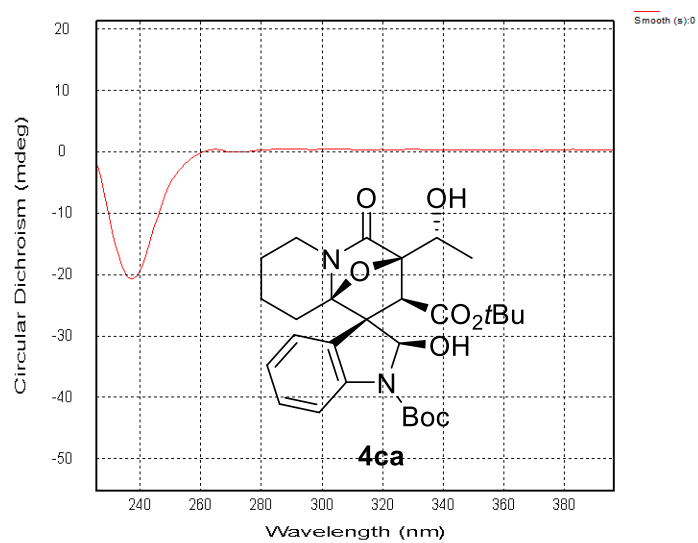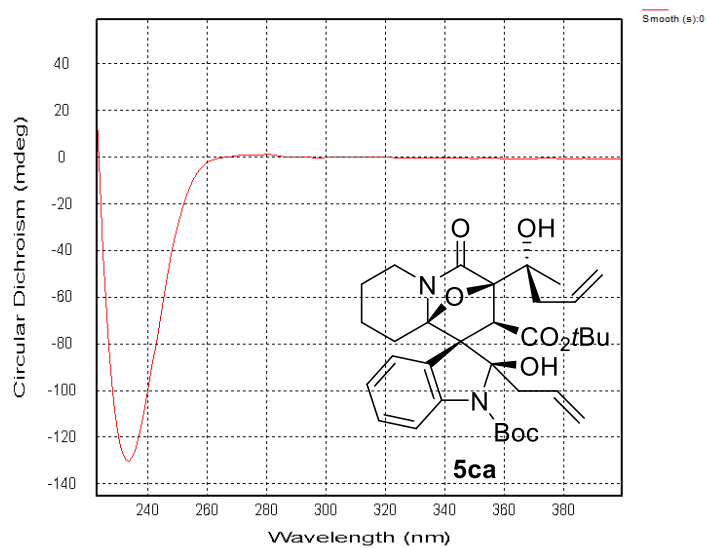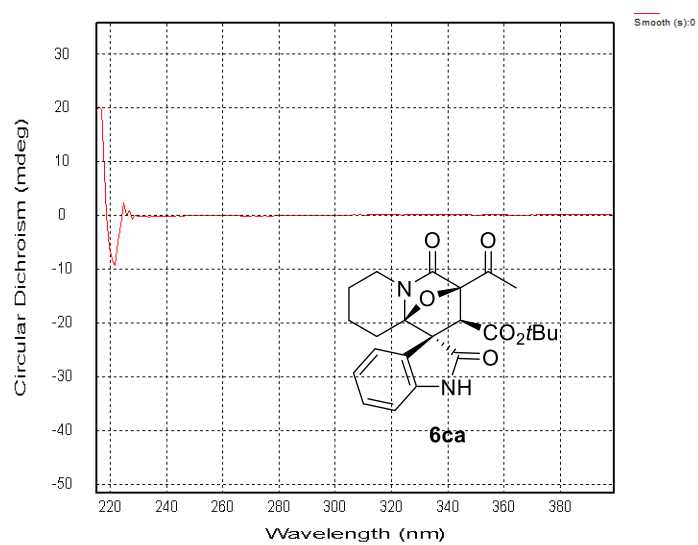

Supplement: d1cc03685h1.pdf [file d1cc03685h1.pdf]
